# Supplementary material for: Carbon emissions of Provincial Administrative Regions from the airlines in China
Source: Research Square preprint supplement (doi:10.21203/rs.3.rs-894966/v1), 2021-09-23
Supplement: Supplementary file 1 [file 41e90cd66449f0eae4ac1926.xlsx]

## Sheet: Table 1
Aircraft type	0-500km	501-1000 km	1001-1500 km	1501-2000 km	2001-2500 km	2501-3000 km	3001-3500 km	3501-4000 km
737-800	0.0148	0.0125	0.0104	0.0108	0.0094	0.01	0.0104	0.0096
321-211		0.0139	0.0131	0.012	0.0115		0.0116
330-343E		0.0341	0.0212	0.0184	0.0201	0.0228
777-300ER		0.0347	0.0316	0.0315		0.0319
321-231	0.0147	0.0141	0.0123	0.0118	0.0115	0.0112	0.0133
320-251N		0.0136	0.0107	0.0105	0.011	0.0102
330-243E		0.0288	0.026	0.0199	0.0201
787-9			0.0215	0.0234	0.0227
737-8			0.0103
350-941			0.0222	0.0195
747-8I			0.0445
320-214	0.0153	0.0123	0.0115	0.0114	0.0098	0.0091	0.0091	0.0105
330-223E		0.0232	0.0234	0.0223
787-8		0.0213	0.019	0.0208	0.0176	0.018
321-271N		0.0127	0.01	0.0091	0.0094
320-232	0.0153	0.0129	0.0109	0.011	0.0092	0.0092	0.0094
319-133	0.017	0.0134	0.0131	0.0113	0.0098	0.0093
321-232	0.019	0.0133	0.0139	0.0119	0.012
737 MAX 8	0.0118	0.0124	0.0186	0.0094	0.0096	0.0086		0.0082
320-216		0.0144	0.0136		0.0101
380-841				0.0491
330-323E		0.0248	0.0234	0.0207	0.0218
747-400				0.0406	0.0443
319-132	0.0149	0.0128	0.0101	0.0101	0.0106
737-700	0.0138	0.0109	0.0093	0.0094	0.0095		0.0109
319-115	0.013	0.0112	0.0106	0.0114	0.0107	0.01
321-213		0.0127	0.0128	0.0107	0.0109	0.0118
320-271N		0.0113	0.01	0.009	0.0093	0.0092	0.0093
319-112	0.017	0.0107	0.0116	0.0099		0.0102
757-200		0.0171		0.015
737-900			0.0134	0.0118
767-300					0.0159
E195 LR	0.0125	0.0106	0.0109	0.0103
E190 LR	0.0111	0.0119	0.01	0.0088	0.0093
CRJ900	0.009	0.0087	0.0071	0.0066
737-900ER		0.0109	0.0115	0.0107		0.01
319-131		0.0107	0.0097	0.0105	0.011
320-211		0.0095	0.0106
320-233		0.0115		0.0108
CAR J21 700		0.0091	0.01
CORPMA-60	0.0048
319-122				0.0108
Note: Data blank represents flights without corresponding distance.

## Sheet: Table 2
Aircraft type	Engine type	LTO emissions (kg)
737-800	CFM56	2816.04
321-211	V2500	2790.79
330-343E	Trent 772	6920.14
777-300ER	GE90	7562.85
321-231	V2500	2790.79
320-251N	V2500	2790.79
330-243E	Trent 772	6920.14
787-9	GEnx/Trent 1000	5340.38
737-8	CFM56	5134.8
350-941	Trent XWB	6639.68
747-8I	GEnx-2B67	10910.6
320-214	V2500	2790.79
330-223E	PW4168	6332.94
787-8	GEnx/Trent 1000	5340.38
321-271N	V2500	2790.79
320-232	V2500	2790.79
319-133	V2500	2790.79
321-232	V2500	2790.79
737 MAX 8	CFM56	5134.8
320-216	V2500	2790.79
380-841	Trent 970	6187.72
330-323E	PW4168	6332.94
747-400	CF6 80/PW4000/RB211	11193.8
319-132	V2500	2790.79
737-700	CFM56	5134.8
319-115	V2500	2790.79
321-213	V2500	2790.79
320-271N	V2500	2790.79
319-112	V2500	2790.79
757-200	RB211/PW2040	5245.42
737-900	CFM56	5134.8
767-300	CF6 80/PW4000/RB211	5596.92
E195 LR	CF34-10E	1996.3
E190 LR	CF34-10E	1996.3
CRJ900	CF34	1671.95
737-900ER	CFM56	5134.8
319-131	V2500	2790.79
320-211	V2500	2790.79
320-233	V2500	2790.79
CAR J21 700	CF34-10A	1917.37
CORPMA-60	PW-127J	1564.61
319-122	V2500	2790.79

## Sheet: Table 3
No.	Routes	Stop and city	Air China	China Southern Airlines	China Eastern Airlines	Hainan Airlines	Shanghai Airlines	Juneyao Airlines	Shenzhen Airlines	Xiamen Airlines	Chengdu Airlines	Spring Airlines	Lucky Air	Kunming Airlines	Shandong Airlines	Sichuan Airlines	Tibet Airlines	9 Air	Loong Air	West Air	Capital Airlines	China United Airlines	Colorful Guizhou Airlines	Okay Airways	Tianjin Airlines	Ruili Airlines	Qingdao Airlines	Urumqi Airlines	Hunan Airlines	Fuzhou Airlines	Jiangxi Airlines	Donghai Airlines	Hebei Airlines	China Express	Suparna Airlines	Beibu Gulf Airlines	Changan Airlines	Chongqing Airlines	Changsha Airlines	LJ Air	Joy Air	Grand China Airl
1	Beijing-Shanghai	One flight stops Luoyang，321-211（China Eastern），1688KM	737-800-1；330-343E-2；330-243E-1；787-9-4；350-941-3；747-8I-1；777-300ER-3	330-243E-1	737-800-2；321-211-4；330-343E-16；777-300ER-2；320-251N-1；	737-800-2；787-9-2；737-8-1；350-941-1	737-800-1；787-9-1	321-231-1
2	Guangzhou-Shanghai	None	330-343E-2；330-243E-1；	777-300ER-4；320-214-1；330-223E-1;330-323E-1;787-9-3；321-211-2；787-8-2；321-271N-1	321-231-1；737-800-7；321-211-1；	330-343E-1；787-9-1	330-343E-2；;737-800-6；787-9-2；	321-231-1				320-214-4
3	Shanghai-Shenzhen	One flight stops Sanming，321-231（Juneyao），1265KM；One flight stops Nanchang，319-133（Shenzhen），1397KM；One flight stops Quanzhou，320-216（Shenzhen），1477KM；One flight stops Jingdezhen，320-232（Shenzhen），1344KM	321-232-1	321-231-5；330-343E-5；320-232-2	321-231-5；330-343E-3；737-800-2；320-232-1；321-211-4	737 MAX 8-1	737-800-1；787-9-1	321-231-4；321-211-1；787-9-1	330-343E-2；320-232-2；737-900-2；319-133-1；320-214-2；319-115-1；320-216-1	737-800-3		320-214-5
4	Guangzhou-Beijing	None	787-9-1；330-343E-2；777-300ER-4；747-400-1；350-941-1	787-9-3；380-841-2；787-8-1；330-223E-2；777-300ER-1；330-323E-2；321-231-1；330-243E-2	330-343E-1	787-9-1；787-8-2；330-343E-1；350-941-1
5	Chengdu-Beijing	None	330-343E-6；350-941-2；330-243E-2；321-213-1；777-300er-2；320-232-1；319-115-1；321-232-1	330-343E-1；330-323E-3；330-243E-1	737-800-1	330-343E-3			737-800-1							330-343E-1；350-941-2；321-231-1；321-271N-2；320-232-1；320-214-1；321-211-1
6	Beijing-Shenzhen	有（One flight stops Yichun，320-214（Shenzhen，3-31），2295KM；One flight stops Ganzhou，321-231（China Southern，3-26），1973KM）	787-9-2；330-343E-2；777-300ER-3；737-800-1；747-400-1	321-231-4；330-243E-1；330-343E-4；320-232-1；330-323E-1		330-243E-2；330-343E-1；787-8-3			320-214-1；330-343E-4；737-800-1；737 MAX 8-1	787-9-1；737-800-1
7	Chengdu-Shanghai	One flight stops Chizhou，320-214（Juneyao ，2-51），2067KM	321-213-2；321-232-2；330-243E-2；320-214-1；330-343E-2	321-211-1；737-800-2	320-232-3；321-211-4；330-243E-1；321-231-1；319-115-1		787-9-1；737 MAX8 -1	320-214-1；321-231-2			320-214-1	320-214-1				321-231-1；330-343E-1；321-271N-1	330-243E-2
8	Chongqing-Shanghai	One flight stops Huangshan，737-800（Shanghai，2-27）， 1515	737-800-4		320-214-1；321-231-3；320-232-1；737-800-2	787-9-1	737-800-2；737MAX8-1；321-211-1	320-214-1；321-231-1；321-211-1		737-800-1		320-214-3			737-800-2	321-231-1；330-243E-1				320-214-1																		320-214-1；320-232-1
9	Guangzhou-Chengdu	None	321-213-5；320-271N-1；321-232-1	737-800-2；330-223E-1；320-271N-1；319-115-1；321-271N-3；330-323E-1	320-232-1	737max8-1			737-800-2；320-214-1		320-214-1					320-271N-1；321-231-1；330-343E-1；321-271N-1					321-231-1
10	Chengdu-Shenzhen	One flight stops Zunyi，320-214（Chengdu），1324	320-214-1；321-213-3；319-115-1；321-232-1	330-343E-2；321-231-2	319-133-1	787-8-1；330-243E-1			330-343E-2；737-800-1；320-232-3		320-214-2					320-232-1；320-271N-2	319-115-1
11	Hangzhou-Beijing	None	321-213-7；330-243E-1；320-232-1；321-232-2；330-343E-3		330-243E-1；321-211-3	737-800-1；330-243E-1；330-343E-1	737-800-2			787-9-1									320-251N-1		321-231-1
12	Guangzhou-Hangzhou	None	321-232-3	737-800-2；321-211-1；321-271N-5；321-231-1；319-112-1	320-214-1；321-211-2	737-800-3	737-800-1		320-214-1	737-800-1						320-214-1			320-214-1；320-251N-1		320-251N-1
13	Shanghai-Xi'an	One flight stops Yancheng，320-214(China Eastern)， 1333KM	320-232-1		320-214-3；321-231-6；321-211-3；330-343E-3；320-232-1	737-800-2	737 MAX 8-2	320-214-4；321-231-2				320-214-2
14	Chongqing-Shenzhen	None	737-800-2；737MAX8-1	321-231-2		737-800-1；787-9-3			737-800-4；320-214-1；737MAX8-1	737-800-1		320-214-1				320-232-1；320-214-1；321-231-1	319-115-1			320-214-1												737-800-1						320-232-1；319-132-1
15	Xishuangbanna-Kunming	None		737-700-2	737-700-11；320-214-1；319-132-1		737-700-1				320-214-1		737-700-1；319-115-1；320-214-4	737-700-3		320-232-2				320-232-1	320-214-1			737-800-1		737-700-2
16	Chongqing-Beijing	One flight stops Taiyuan,1651km，737-800（China Eastern）；One flight stops Zhongwei；319-133（Sichuan），2162	330-243E-1；737-800-9；787-9-1；330-343E-1	330-243E-1；321-231-1	737-800-1；320-214-1	787-9-1									737-800-1	330-243E-1；321-231-2；319-133-1																						320-232-1；320-214-1
17	Beijing-Xi'an	None	737-800-3；321-213-4；321-232-1	330-243E-1；320-232-1	321-211-6；321-231-1；330-343E-1；320-214-1；320-232-2	330-243E-2；737-800-1
18	Guangzhou-Chongqing	None	737-800-2；737-700-2	319-115-1；737-800-1；320-251N-2		737-800-1；787-9-2			737-800-1							321-231-1；321-211-1				320-232-2；320-214-1																		320-232-4；320-251N-2
19	Shanghai-Qingdao	None		320-214-1	320-232-3;320-214-1；321-211-4；321-231-2		737-700-1；737-800-2	321-231-2；320-214-2;321-231-1				320-214-2			737-800-2;737-800-7；737 MAX 8-1
20	Shanghai-Xiamen	None			320-214-1；320-232-1；321-231-1；		737-700-1；737-800-3;737-800-3	320-214-2		737-700-1；737-800-7；757-200-1		320-214-4			737-800-1
21	Kunming-Beijing	One flight stops Luzhou，737-800（China Eastern），2370KM；One flight stops Qianjiang：737-700（China Eastern）， 2131KM；One flight stops Wanzhou：320-232（Sichuan），2517KM；One flight stops Dazhou，737-700（Air China），2165KM；One flight stops Taiyuan，737-700（China Eastern），2284KM	320-214-2；737-700-1；330-343E-1	330-243E-3	737-800-9；330-243E-1；737-700-3；737MAX8-1	737-800-1；787-8-1										320-232-2
22	Hangzhou-Shenzhen	None	321-232-2；320-232-1	321-231-4；321-211-1；320-232-2		737-800-2			737-800-3；320-232-1；737-900-2	737-800-3									320-251N-1
23	Kunming-Shanghai	One flight stops Hefei，320-214（China Eastern）， 2207； One flight stops Xingyi，737-800（China Eastern）， 2005KM；One flight stops Liupanshui，737-700（China Eastern），2162； One flight stops Nanchong，319-115（China Eastern）， 2179； One flight stops Fuzhou，320-232（China Eastern）， 2637； One flight stops Changsha，737-800（Shanghai）， 2080； One flight stops Nanchang，321-211（China Eastern）， 2101； One flight stops …	320-232-1	320-214-1；321-211-1	737-800-6；330-243E-1；320-214-1；737-700-6；319-115-2； 320-232-1；321-211-2；321-231-1		737-800-2；737-700-6；767-300-1	320-214-3；321-231-1				320-214-2	737-800-2	737-800-2
24	Beijing-Sanya	None	777-300ER-1；321-213-2	321-231-4		330-343E-1										320-214-1					330-343E-1																					737-800-1
25	Chengdu-Kunming	None	320-214-2；319-115-1		737-800-6；737-700-1						320-214-1		737-800-1；737-700-1	737-800-1		320-214-1；320-232-2										737-800-1			320-214-1
26	Dalian-Shanghai	One flight stops Weihai，E195 LR(Tianjin), 1347KM；One flight stops Weifang，737-800（Hainan）， 1129KM； One flight stops Rizhao，737-800（Shanghai）， 970KM	737-800-1	321-231-6；320-214-1	321-231-1；320-214-4；320-232-2；319-115-1	737-800-1	737-800-2	321-231-1；320-214-1		737-800-1		320-214-3													E195 LR-1
27	Guangzhou-Xi'an	None		737-800-6；737-700-1；321-271N-1	321-211-1；320-214-2；321-231-1	737-800-4			320-214-3									737-800-1
28	Harbin-Beijing	None	321-232-1；737-800-3；320-214-1；321-213-1；	321-231-2；320-214-3；320-232-1	737-800-1；320-232-1；321-211-1	737-800-1																																				737-800-2
29	Guangzhou-Nanjing	None		737-800-2；321-231-1；321-271N-3；319-132-1；320-251N-1	320-214-1；320-251N-1	737-800-2；737MAX8-1（			737-800-7									737-800-1
30	Shanghai-Shenyang	None		320-214-3；321-231-3	320-214-3		737-800-2；737-700-1；737 MAX8-1	320-214-3；321-231-1；321-211-1	320-214-1			320-214-2
31	Changsha-Beijing	None	321-213-2；330-343E-1；321-232-1	321-231-5；320-214-1；320-232-1		787-9-1；737-800-1；787-8-1；330-243E-1				737-800-1
32	Shanghai-Sanya	One flight stops Wenzhou，737-800（Shanghai），2220		321-231-1；321-211-2	321-231-1；320-214-1		737-800-3	321-231-2；321-211-2				320-214-2																							787-8-1
33	Guangzhou-Haikou	None		321-271N-2；320-232-2；;321-231-1；321-211-2；;320-214-3		737-800-6			320-216-1									737-800-1
34	Beijing-Xiamen	One flight stops Zhoushan，737-800（Xiamen），2188KM；One flight stops Rizhao，737-800（Shandong），1785KM；One flight stops Hefei，320-214（China Eastern），1859KM；One flight stops Jinan，737-800（Shandong），1812KM	737-800-4；321-213-1；321-232-1		320-214-1	737-800-2				737-800-2；757-200-2；787-8-1；787-9-1					737-800-3						320-232-1
35	Nanjing-Shenzhen	None		320-232-1；321-231-3	321-211-1；320-214-2	737-800-1；737 MAX 8-1；787-9-1			320-232-1；737-800-2；320-214-1；737 MAX 8-2；330-343E-1											320-214-1												737-800-1
36	Dalian-Beijing	None	737-800-8	321-231-6；320-232-1	737-800-1	737-800-1
37	Beijing-Urumqi	One flight stops Zhongwei，320-232（Sichuan）， 2906KM	737-800-1；737max8-5	737-800-2；737max8-1；320-232-1；321-231-3；787-8-1		330-343E-1；737-800-2										320-232-1					321-231-1
38	Harbin-Shanghai	One flight stops Qingdao，321-231（China Eastern），1804KM；One flight stops Tianjin，320-214（China Eastern）， 2323KM； One flight stops Yingkou，320-232（China Eastern），1694KM；	321-231-1	321-231-1；320-214-1	320-232-1；321-231-2；320-214-2		737-800-1；737-700-1	321-231-2；320-214-1				320-214-3			737-800-1
39	Shenzhen-Xi'an	One flight stops Xingyi，737-800（Donghai），2508KM；One flight stops Zhanjiang，320-232（China Southern），1935KM；One flight stops Jinggangshan，320-232（China Eastern），1908KM）		737-800-2；320-232-3	320-214-1；320-232-1	737-800-1；330-343E-1；737 MAX 8-1			320-214-1；320-232-2；330-343E-1；737-900-1			320-214-1				320-232-1																737-800-1
40	ShanghaiPudong-Wuhan	None		737-800-4	737-800-5；319-115-1			320-214-1
41	ShanghaiHongqiao-Wuhan	None			737-800-7		737-800-1；737-700-1
42	Chengdu-Hangzhou	One flight stops Changsha，320-214（Chengdu），1745KM；One flight stops Fuyang；320-214（Sichuan），1679KM；	330-243E-1；320-232-1；330-343E-1；321-232-1		320-214-2；319-133-1					737-800-2	320-214-1					320-214-1；320-232-1；321-231-1			320-214-1；320-251N-1		330-243E-1
43	Guangzhou-Kunming	None		320-214-1；320-271N-5；319-112-1；319-132-1	737-800-9；321-231-1				320-214-1；319-133-1				737-800-1	737-800-1		320-214-1
44	Changchun-Shanghai	One flight stops Qingdao，321-231 (Juneyao)，1744	320-232-1；321-231-1	320-232-4；321-231-1	321-231-1		737-800-4	320-214-3；321-231-1				320-214-2
45	Shanghai-Tianjin	None	737-800-4		320-214-1；320-232-1；320-251N-1		737-800-3；737-MAX 8-2	321-231-1				320-214-1										737-800-2			320-214-1
46	Changsha-Shanghai	None		321-231-1；320-214-1；321-211-1	737-800-1；319-115-1；320-214-1； 319-115-1	737-800	737-800-4；737 MAX8 -1	321-231-2；320-214-1				320-214-1
47	Chongqing-Hangzhou	One flight stops Xiangyang，320-214（China Express），1485KM	737-800-2；320-232-1；319-131-1			737-800-1				737-800-3						320-232-1；319-133-2			320-251N-1	320-232-1	320-232-1													320-214-1				320-232-2
48	Beijing-Wuhan	One flight stops Linfen，320-214（Air China），1268KM	321-213-2；320-214-4	737-800-3；321-231-2	737-800-4	737-800-1									737-800-1
49	Beijing-Qingdao	None	321-213-1；737-800-4		321-211-2；320-214-1；320-232-2										737-800-3						330-243E-1
50	Chongqing-Kunming	One flight stops Zhaotong，737-700（China Eastern），756KM		320-251N-1；321-231-1；737-800-1	320-214-1；737-700-1；320-232-3								737-800-1	737-800-2；37-700-1		320-214-1；320-232-2				320-232-1												737-800-1						320-232-1
51	Urumqi-Xi'an	None		737-800-2；319-133-1	320-232-2；320-214-1；737-800-1	737-800-3						320-214-1				319-133-1								737-800-1	321-231-1			737-800-1			737-800-1
52	Zhengzhou-Kunming	None		737-700-2；737-800-3	320-232-1；737-800-2		737-800-1						737-800-4	737-800-1		320-232-1
53	Guiyang-Shanghai	None	320-214-1	737-800-4	321-231-1		737-800-2；321-211-1	321-231-2；321-211-1				320-214-1																							737-800-1
54	Kunming-Dehong	None			737-700-9								737-700-2	737-700-2												737-700-7
55	Kashgar-Urumqi	None	737MAX8-1	E190 LR-4；737-800-5	320-232-1	737-800-2									737-800-1	321-271N-1									320-232-2			737-800-2
56	Haikou-Beijing	One flight stops Meizhou，319-132（Capital），2509KM；One flight stops Anqing，737-800（Hainan），2391KM	321-232-1；321-213-1	321-231-1；321-211-2	321-211-1	330-343E-1；737-800-5															319-132-1
57	Chengdu-Lhasa	One flight stops Yushu，319-133（China Eastern），2371KM	319-115-4；330-243E-1		319-133-2						319-115-1		737-700-1			319-133-3；330-343E-1	319-115-1；330-243E-3
58	Kunming-Shenzhen	None		321-231-2；320-232-2	737-800-3	737-800-1			737-800-3				330-343E-1	737-800-1
59	Hangzhou-Xi'an	One flight stops Tianshui，CRJ900（China Express）,1717KM；One flight stops Shiyan，320-214（LoongAir）,1230km）One flights stop Enshi，320-232（Capital）and 320-251N（LoongAir），1516KM	320-232-3		320-214-1；321-231-3	737-800-3				737-800-2									320-214-1；320-251N-1		320-214-1；320-232-1													CRJ900-1
60	Guangzhou-Tianjin	One flight stops Wuhan，737-800（China Southern），1955KM	737-800-3；737-700-1	737-800-3；319-132-1；E190LR-1		737-800-1				737-800-1								737-800-1			321-231-1			737-900ER-1	320-232-1
61	Haikou-Shenzhen	None		321-211-1；320-232-2；320-214-1；321-231-1		737-800-5			737-800-2															737-800-1
62	Kunming-Nanjing	One flight stops Nanchang，320-214（Juneyao），2040KM；One flight stops Zunyi，737-800（Kunming），1743KM；One flight stops Baoshan，737-700（Kunming），2438KM			320-214-5；320-232-2；319-132-1；330-243E-1；320-251N-1			320-214-1	320-214-1				737-800-1	737-800-1；737-700-2	737-800-1	320-214-1													320-214-1
63	Zhengzhou-Shenzhen	None			737-800-5	737-800-1；737MAX8-1			320-214-2；320-232-1											320-214-1												737-800-1			737-800-1
64	Kunming-Xi'an	None		320-214-2	321-231-1；320-214-2；320-232-1；737 MAX8 -1	737-800-1								737-800-1		320-232-1									320-214-1；320-232-1	737-800-1
65	Guangzhou-Zhengzhou	None		737-800-8		737-800-2												B737-800-1；737-800-1			321-231-1
66	Guiyang-Beijing	None	320-214-2；737-800-2；737max8-1	737-800-5		737-800-1；330-243E-1
67	Chengdu-Nanjing	None	321-213-1		321-211-3；330-243E-1				737-800-2		320-214-1					321-231-2；320-271N-1
68	ShanghaiPudong-Zhuhai	One flight stops Jieyang，737-800（Shanghai），1410KM		737-800-3	320-232-1		737-800-1																												737-800-1
69	ShanghaiHongqiao-Zhuhai	None			321-211-1		737 MAX8-1；737-800-1	321-231-2				320-214-1
70	Chongqing-Nanjing	None	737-800-1；737-700-1		320-232-1；320-251N-2				320-232-2							320-232-1；321-231-1				320-214-1	320-214-1																	320-232-1
71	Changchun-Beijing	None	737-800-2；321-213-1；330-343E-1；330-243E-1	320-232-3；319-132-1；321-231-1；330-323E-1		737-800-1
72	Zhengzhou-Shanghai	None		737-800-2；737-700-1	320-251N-1；320-232-1		737-800-7；737-700-1	320-214-1
73	Fuzhou-Beijing	None	737-800-3			737-800-2				737-800-3；757-200-1；787-8-2
74	Yulin-Xi'an	None		321-231-1	320-214-1；320-232-5；319-115-2					737-700-1						319-133-1									E190 LR-3；E195 LR-2
75	Zhengzhou-Haikou	One flight stops Liuzhou，320-214（Chengdu），1708KM；One flight stops Changde，E190 LR（Beibu Gulf），1657KM		320-214-1；737-800-1		737-800-4			737-800-1		320-214-1				737-800-1																					E190 LR-1
76	Guangzhou-Ningbo	None	737-800-1	321-211-1；737-800-1；321-271N-1；737 MAX 8-1	737-800-1；320-214-1	737-800-2			737-800-1									737-800-1
77	Hangzhou-Guiyang	One flight stops Yichang，320-251N（Capital），1677KM	320-232-1	737-800-3				321-231-1		737-800-3						320-214-1			320-251N-1；320-214-1		320-251N-1
78	Kunming-Wuhan	One flight stops Yibin，737-700（China Eastern），1465KM		737-800-1；320-232-1；737-700-2	737-800-3；737-700-1								737-800-1；320-214-2
79	Nanchang-Beijing	None	737-800-4；321-213-1		320-214-2；320-232-1	737-800-2																									737-800-1
80	Yinchuan-Xi'an	None	319-131-1	321-231-1	320-214-4；321-231-3	737-800-1			320-214-2	737-800-1														737-800-1													737-800-1
81	Zhengzhou-Chengdu	None	321-232-1；319-115-1；	737-800-3；320-232-1							320-214-2		330-343E-1			321-271N-1
82	Shanghai-Taiyuan	None			737-800-6	737-800-1	737 MAX 8-1	320-214-1				320-214-1
83	Guangzhou-Wenzhou	None	737-700-1	737-800-5	737-800-1	737-800-1			737-800-1；320-214-1									737-800-1
84	Chengdu-Wuhan	None	320-214-1；321-213-1	737-800-1；737-700-1	737-800-4						320-214-1					320-271N-1
85	Guangzhou-Wuhan	None	320-214-1	737-800-5；330-223E-1；330-323E-1；787-8-1	737-800-2
86	Chengdu-Sanya	None	321-213-1								320-214-1		737-800-1			321-231-1	320-214-1
87	Chengdu-Urumqi	One flight stops Lanzhou，319-133（Sichuan），2698KM	320-271N-2；319-115-1	737max8-3		737-800-1							737-700-1			320-271N-1；320-214-1；319-133-1					321-231-1							737-800-1
88	Guangzhou-Wuxi	None		737-800-1；321-211-1	320-214-1；321-211-2				737-800-5									B737-800-1；737-800-1
89	Nanning-Shanghai	One flight stops Wuyishan，320-214（China Eastern），1740KM	320-232-1	737-800-2	320-214-1		737-800-3；737-700-1；737 MAX 8-1	321-211-1；321-231-1				320-214-1
90	Nanjing-Xi'an	One flight stops Tianshui，CRJ900（China Express）,1546KM			320-232-1；320-214-2；321-211-1；320-251N-1	737-800-2		321-211-1	320-214-1	737-800-1															320-214-1									CRJ900-1
91	Hangzhou-Kunming	One flight stops Ganzhou，737-800（Lucky），2029KM；One flight stops Wuhan，737-800（China Southern），2020KM；One flight stops Guiyang，320-214（LoongAir），1987KM；One flight stops Liuzhou，320-214（China Eastern），1943KM；One flight stops Bijie， 320-214（Juneyao ），2131KM	319-131-2	737-800-1	320-214-4			320-214-1		737-800-1			320-214-1；737-800-1	737-800-1		320-232-1			320-214-2		320-214-1
92	Fuzhou-Shanghai	None			777-300 ER-1；320-214-1；321-231-1；319-133-1；319-115-1		737-800-1	320-214-1		737-800-4																				737-800-1
93	Beijing-Lanzhou	None	320-214-1；737-800-2；319-131-1；319-115-1		320-214-3；737-800-1	737-800-1																										737-800-1
94	Harbin-Qingdao	None		737-800-2；320-232-1	321-211-1；320-232-1	737-800-1			737-800-1	737-800-2																	320-214-3
95	Nanjing-Beijing	None	737-800-3；321-213-1；321-271N-1		320-232-2；320-211-1；321-211-1；330--243E-1；320-214-2
96	Guiyang-Nanjing	One flight stops Wanzhou，E190 LR-1（Colorful Guizhou），1491KM		737-800-3；320-214-1	320-214-1			321-211-1；320-214-1	737-800-2									737-800-1		320-232-1			E190 LR-1
97	Hotan-Urumqi	None		737-700-1；737-800-6			737-800-1								737-800-1										320-214-1；320-232-2			737-800-1
98	ShanghaiHongqiao-Urumqi	One flight stops Xi'an，320-214（Spring），3657		737-800-3；737 MAX 8-2	320-214-1	737-800-1	737-800-1	320-214-2				320-214-2
99	ShanghaiPudong-Urumqi	One flight stops Hohhot，737-800（Hainan）， 3802；One flight stops Lanzhou，737-800（Shanghai），3648		737-700-1	320-214-1	737-800-1	737-800-1
100	Kunming-Lijiang	None		320-232-1；319-132-1	737-700-5				320-232-1				737-700-3；319-112-1	737-700-2		319-133-1					320-214-1					737-700-1
101	Haikou-Changsha	One flight stops Wugang，737-800（9 Air），1063KM		320-232-2	737-800-1	737-800-2;787-9-1									737-800-1			737-800-1			321-231-1									737-800-1		737-800-1
102	Zhengzhou-Urumqi	None		737-800-1；320-214-1；321-231-1	321-231-1；319-115-1	737-800-1				737-800-1	320-214-1													737-900ER-1
103	Changsha-Xi'an	None		321-231-2；737-800-1	321-231-1；320-232-1	737-800-1；330-243E-1				737-800-1	320-214-1													737-800-1
104	Hohhot-Beijing	None	737-800-7
105	Urumqi-Lanzhou	None		737-800-1；320-214-1；320-271N-1		737-800-1	737-800-1						737-800-1；737-700-1		737-800-1	320-214-1				320-214-1							320-214-1	737-800-3
106	Nanning-Beijing	None	737-800-2；321-271N-1；321-213-1	737-800-3		737-800-1；330-343E-1			737-800-1
107	Chongqing-Changsha	One flight stops Wugang，CRJ900（China Express），807KM	737-800-1	320-214-1；737-800-1		737-800-1				737-800-1						320-232-1；321-231-1				320-214-2				737-800-1										CRJ900-1				320-233-1
108	Chongqing-Xi'an	One flight stops Tianshui，CRJ900（China Express）, 810KM			320-214-1；320-232-1	330-243E-1										320-214-1；319-133-1；320-232-1				320-214-1	320-214-1				320-271N-1									CRJ900-1
109	Shenzhen-Wuxi	None		320-232-1	320-211-1				737-800-8																							737-800-1
110	Chongqing-Sanya	One flight stops Yongzhou，CRJ900LR（China Express）, 1534KM		321-231-1；320-214-1												320-232-1；320-214-1				320-232-1；320-214-1														CRJ900LR-1				319-132-1				737-800-1
111	Shenzhen-Tianjin	One flight stops Huaihua，737-800（Donghai），2367KM；One flight stops Yancheng，320-214（Spring），2037KM	737-800-4						737-800-2	737-800-2		320-214-1												737-800-2								737-800-1
112	Beijing-Shenyang	None	737 MAX8-1；737-800-2；319-115-2	321-231-3；320-214-2
113	Guangzhou-Sanya	None		320-251N-1；320-214-2；321-211-2；320-232-2；737-800-1；321-231-2		737-800-1
114	Chengdu-Tianjin	None	321-213-1；737-800-1；								320-214-1					321-231-1；321-271N-1	320-214-1							737-900 ER-1	330-343E-1
115	Chengdu-Changsha	None	321-213-1；321-232-1	320-214-1							CAR J21 700-1；320-214-2			737-800-1		320-271N-1								737-900 ER-1
116	Xi'an-Xining	None		737-800-1；320-232-1	319-115-4；320-214-1	737-800-3		320-214-1	320-232-1						737-800-1	319-133-1																					737-800-1
117	Haikou-Shanghai	One flight stops Jinggangshan，737-800（Shanghai），1760KM	321-232-1	321-231-1；321-211-1		737-800-1；737 MAX 8-1	737-800-3；737-800-1	320-214-1
118	Chongqing-Haikou	One flight stops Liuzhou，CRJ900LR（China Express）, 1127KM		320-232-1		737-800-3；737max8-1										320-232-1				320-214-1					320-214-1；320-232-1									CRJ900LR-1
119	Guangzhou-Jinan	None		321-271N-2；737-800-1	320-232-1				320-214-2；737-800-1						737 MAX 8-2
120	Kunming-Xiamen	None			737-800-2					737-800-1；737 MAX 8-1				737-800-1	737-800-2	320-232-2
121	Beijing-Yantai	None	737-800-2；319-131-1		320-214-2										737-800-3
122	Chengdu-Jinan	None	321-213-1		320-232-1						320-214-1		330-343E-1		737-800-1	321-231-1；321-271N-1			320-214-1
123	Nanjing-Xiamen	None			320-251N-2；319-132-1			320-214-1		737-800-3					737-700-1；737-800-1																		737-800-1
124	Zhengzhou-Xiamen	None	737-800-1			737-800-2				737-800-3					737-800-3
125	Changsha-Kunming	One flight stops Diqing，737-700（Kunming），1884KM		320-232-1；320-214-1	737-800-2	737-800-1	737-800-1							737-800-1；737-700-1		320-232-1								737-800-1
126	Yinchuan-Beijing	One flight stops Ulanqab，737-800（Shandong）， 972KM	737-800-4；321-232-1	320-214-1	321-231-1；320-232-1										737-800-1																											737-800-1
127	Beijing-Zhuhai	One flight stops Wenzhou，320-251N-1（LoongAir）.2632KM	321-232-1；737-800-1；321-213-2	737-800-4											737-800-1				320-251N-1
128	Chongqing-Tianjin	One flight stops Jining，CRJ900-1（China Express）;1651KM	737-800-1	320-232-1						737-800-1						321-231-1	319-115-1			320-214-1					330-243E-1；320-232-1；320-232-1									CRJ900-1
129	Hefei-Shenzhen	None	737-800-1	320-232-1；321-231-1					737-800-3；319-133-1											320-232-1												737-800-1			737-800-1
130	Shanghai-Lanzhou	One flight stops Zhengzhou，737-700（Spring ），1911KM；One flight stops Zhengzhou，737-700（Shanghai），1911KM	320-232-1		320-214-2；320-232-1；321-231-1		737-800-2；737-700-1	320-214-1				320-214-2；737-700-1
131	Chongqing-Xiamen	One flight stops Bijie，320-214（China Express）， 1760；One flight stopss Changsha，320-214（West Air）and 321-231（Sichuan），1568KM	737-800-1							737-800-3；737-700-1					737-800-1	321-231-1	319-115-1			320-214-2														320-214-1				319-115-1
132	Chongqing-Jinan	One flight stops Nanyang，CRJ 900 LR（China Express）, 1300KM			320-232-1										737-800-4	321-231-1				320-232-2														CRJ 900 LR-1
133	Dalian-Nanjing	None	737-800-1	737-800-1；320-232-1；320-214-1	320-214-4	737-800-1		320-214-2		737-800-1
134	Guilin-Shanghai	One flight stops Anqing，320-232（China Eastern），1583	321-232-1	737-800-1	320-232-1		737-700-1；737-800-3	321-211-1				320-214-1																							737-800-1
135	Zhengzhou-Chongqing	None	737-700-1	737-700-2；737-800-3												321-231-1				320-232-1					320-232-1
136	Changsha-Tianjin	One flight stops Zhangjiajie，CRJ 900 LR-1（China Express），1860KM	737-800-1	320-214-1		737-800-1				737-800-1														737-900ER-2；737-800-2										CRJ 900 LR-1
137	Chengdu-Qingdao	None	321-232-1		320-232-1										737-800-1	321-271N-1；321-211-1					320-232-1						320-214-1
138	Changsha-Xiamen	None								737-800-4					737-800-1	319-133-1				320-214-1				737-800-1	E 190 LR-1
139	Urumqi-Yining	One flight stops Tuscaloosa，E190 LR（China Southern）， 793KM	737-800-1	737-800-3；E190 LR-3；737 MAX8-1	320-214-1																				E195 LR-2
140	Tianjin-Xi'an	One flight stops Ulanqab，CRJ900（China Express）, 1259KM	737-800-1							737-800-1														737-800-1	320-271N-1；320-214-2；E195 LR-1；E190 LR-1									CRJ 900-1
141	ShanghaiPudong-Shijiangzhuang	None										320-214-1										737-800-2											737-800-1
142	ShanghaiHongqiao-Shijiangzhuang	None										320-214-2										737-800-1											737-800-1
143	ShanghaiHongqiao-Yantai	None			320-214-2		737-700-1；737-800-1								737-800-3
144	ShanghaiPudong-Yantai	None			320-214-2；737-800-1
145	Zhengzhou-Hangzhou	None		737-800-1；737-700-2		737-800-1	737-800-1			737-800-1						320-214-1			320-214-1		320-251N-1
146	Nanchang-Xi'an	None			320-214-1；320-232-1	737-800-1																		737-900 ER-1	320-214-1；E195 LR-1					737-800-1	737-800-1						737-800-1
147	Shenzhen-Jinan	None				737MAX 8-1			737-800-2；737-900-1						737-800-3					320-232-1															737-800-1
148	Guangzhou-Urumqi	One flight stops Kunming，737-800（China Eastern）， 4277KM	737-800-1	737-800-4；737 MAX 8-2	737-800-1	737-800-1
149	Guiyang-Xi'an	One flight stops Liupanshui，E190 LR（Tianjin）, 1157KM			320-232-1	737-800-1									737-800-3						319-112-1				E190 LR-1；320-271N-1；320-214-1												737-800-1
150	Shenzhen-Wuhan	None	320-214-1	320-232-2；737-800-2	737-800-2				737-800-1
151	Zhengzhou-Shenyang	None		320-232-1；737-800-1					320-232-1；737-800-2		320-214-1							737-800-1；B737-800-1		320-214-1
152	Kunming-Tianjin	One flight stops Enshi，737-700（Ruili），2082KM;One flight stops Xiangyang，737-800（Ruili），2299KM；One flights stop Xi'an， 320-232（Tianjin；Tianjin）， 2221KM	737-800-2		737-800-2											319-133-1								737-800-1	320-232-2；321-231-1	737-800-1；737-700-1
153	Ningbo-Beijing	One flight stops Weifang，737-800（Hainan），1575KM	737-800-3		321-211-1；320-214-3	737-800-1
154	Kunming-Jinan	One flight stops Nanchang，320-232（China Eastern）， 2861KM；One flight stops Chongqing，320-214（China Eastern）， 1949KM			320-232-1；320-214-1						320-214-1		320-214-1	737-800-2	737-800-3	320-232-1
155	Changsha-Sanya	None		321-211-1；321-231-1	321-211-1；320-232-1	737-800-1				737-800-1	320-214-1										321-231-2
156	Aksu-Urumqi	None	737 MAX 8-1	737-800-4；E190 LR-1；737-700-1																					320-232-2；E195 LR-1
157	Hangzhou-Taiyuan	None	320-232-1		320-214-1；737-800-2	737-800-1				737-700-1						320-214-1			320-214-1
158	Hangzhou-Qingdao	None			320-214-1；320-232-1					737-800-1					737-800-3						330-343E-1；319-132-1				320-232-1
159	Wuhan-Xiamen	None	320-214-1	737-800-2	737-800-1					737-800-2；737MAX8-1					737-800-1
160	Haikou-Hangzhou	One flight stops Hengyang，737-800（Hainan），1634KM		320-232-1		737-800-3					320-214-1										320-232-1
161	Zhengzhou-Sanya	One flight stops Jieyang，737-800（China Southern），2430KM；One flight stops Zunyi，320-214（Chengdu），2132KM		737-800-1；320-214-1；321-231-1		737-800-2					320-214-1		737-800-1			320-232-1					321-231-1
162	Chongqing-Urumqi	One flight stops Lanzhou，320-232（West Air），2875KM‘	737-800-1	320-214-1；737-800-3												320-214-3				320-232-1；320-214-1					320-214-1
163	Guilin-Xi'an	None	321-213-1	737-800-1	320-214-1	737-800-1										319-133-1					319-132-1			737-900 ER-1	320-271N-1
164	Guiyang-Wenzhou	None	321-232-1	737-800-2				321-211-1			320-214-2							737-800-1
165	Jinan-Xi'an	None		737-800-1	320-214-2				320-232-1						737-800-2	320-232-1					320-214-1				E190 LR-1	737-800-1
166	Shanghai-Jieyang	One flight stops Zhoushan，320-214(China Eastern)， 1062KM		737-800-1；737-800-1	320-214-2；737-800-1		737-800-3					320-214-1
167	Chongqing-Lhasa	None	319-115-1	319-115-1						737-700-1						319-133-2	319-115-1			319-133-2																		319-115-2
168	Nanning-Xi'an	One flight stops Bijie，E190 LR（Beibu Gulf ）, 1453KM		737-800-1					319-115-1												321-231-1			737-800-2	E190 LR-1											E190 LR-2
169	Qingdao-Xi'an	None			320-214-2；320-232-1	737-800-1									737-800-4	319-133-1
170	Tianjin-Xiamen	One flight stops Fuyang，E195 LR（Tianjin）, 1708KM; One flight stops Shanghai，737-800-1（Shanghai），2011KM	737-800-1				737-800-1			737-800-3					737-800-1										E195 LR-2
171	Guangzhou-Xiamen	None		321-271N-1；737-800-1；737 MAX 8-1；321-271N-1						737-800-3；737-700-1					737-800-1
172	Kunming-Tengchong	None			737-700-6				319-133-1				737-700-3	737-700-2
173	Guangzhou-Qingdao	One flight stops Nanchang，737-800（Shenzhen），1984KM；One flight stops Wuyishan，737-800（Shandong），1780KM；One flight stops Yichun，320-214（Shenzhen）， 1550KM		737-800-3；321-271N-1	321-211-1	737-800-1			737-800-1；320-214-1						737-800-1；737 MAX8 -1
174	Haikou-Nanchang	One flight stops Ganzhou，737-800（Lucky），1112KM		320-232-1		737-800-2			737-800-2				737-800-1								319-112-1；319-132-1；320-232-1										737-800-1
175	Hangzhou-Nanning	One flight stops Changsha，737-800（Hainan）， 1661KM	319-131-1	320-232-1；737-800-1		737-800-1									737-800-1	320-214-1			320-251N-1		320-214-1
176	Beijing-Wenzhou	One flight stops Taiyuan，737-800（China Eastern）， 2151KM	321-213-1；319-131-1；320-232-1；330-343E-1		737-800-2	737-800-1													320-251N-1
177	Chifeng-Hohhot	None	737-700-1																320-214-1						E195 LR-2； E190 LR-6；									CRJ 900 LR-2	737-800-1
178	Guangzhou-Hefei	None		737-800-1；E 190 LR-1	320-214-2	737-800-1			737-800-1；319-133-1
179	Quanzhou-Shanghai	None							320-214-2	737-800-3		320-214-1								320-214-1												737-800-1
180	Harbin-Nanjing	None		737-800-1	320-214-1	737-800-1		321-231-1	737-800-1							321-231-1		737-800-1
181	Xi'an-Xiamen	One flight stops Nanchang，E195 LR（Tianjin）, 1620KM;One flight stops Anqing，320-232（Tianjin），1595KM；One flight stops Changzhou，320-232（China Eastern）， 2077KM；One flight stops Wuyishan，737-800（Shandong）， 1635KM；One flight stops Tongren， 737-800（Changan）， 1685KM； One flight stops Hefei，319-112（Capital）， 1860KM;One flight stops Wanzhou，737-800（Xiamen）， 1842KM			320-232-2；320-214-1；321-231-1					737-800-2；737 MAX 8-2					737-800-1						320-214-1；319-112-1				E195 LR-1；320-232-1												737-800-1
182	Shenyang-Qingdao	None		320-271N-1；320-214-1；320-232-1；321-231-1	320-214-1		737-700-1			737 MAX 8-1					737-800-1									737-800-1			320-214-1
183	Sanya-Xi'an	One flight stops Yibin，319-133（Sichuan）， 2094KM;One flight stops Huaihua，737-800（Changan）， 1801KM;One flight stops Zunyi，320-232（Tianjin），1836KM;One flight stops Yichun，319-112（Capital）， 2521KM；One flight stops Hengyang，320-214（China Eastern）， 1922KM		320-232-1	320-214-1	737-800-2										319-133-1					321-231-1;319-112-1				321-231-1;320-232-1												737-800-2
184	Beijing-Xining	None	320-214-2	320-232-2	320-214-2	737-800-1															319-133-1
185	Hangzhou-Xiamen	None			321-211-1;320-214-1					737-800-3					737-800-4
186	Sanya-Shenzhen	None		321-211-1；320-232-2		330-343E-1			737-800-1；320-232-1
187	Chengdu-Xiamen	One flight stops Jinggangshan，320-214（Chengdu）， 1556KM; One flight stops Guilin，737-800（Shandong）， 1856KM; One flight stops Ganzhou，319-133（Sichuan）， 1591KM; One flight stops Jingdezhen，737-800（Shandong）， 1824KM	321-213-1							737-800-2；787-8-1	320-214-1				737-800-2	321-271N-1；319-133-1
188	Hangzhou-Harbin	One flight stops Yantai，737-800（Hainan）， 2088KM; One flight stops Chifeng，320-251N（LoongAir）， 2038KM； One flight stops Weihai， 319-131（Air China）， 1889KM; One flight stops Tongliao， 320-214（LoongAir）， 1920KM	319-131-1	737-800-1；320-214-1；321-211-1	320-214-1	737-800-1		321-231-1		737-800-2						320-214-1			320-251N-1；320-214-1					737-800-1
189	Hangzhou-Shenyang	None		321-231-1；320-271N-2		737-800-1				737-800-2		320-214-1							320-214-1
190	Hangzhou-Sanya	None		320-271N-1；321-231-1		737-800-2															330-343E-1；321-231-1			737-800-1
191	Zhengzhou-Guiyang	One flight stops Tongren， CRJ 900LR（China Express）, 1163KM		737-800-1							320-214-1		737-800-1		737-800-1					320-214-1			E190 LR-1		320-232-1									CRJ 900 LR-1
192	Haikou-Wuhan	One flight stops Nanning， 737-700（China Southern）， 1510KM; One flight stops Jieyang，737-800（China Eastern）， 1807KM	320-214-1	737-800-1；321-211-1； 737-700-1；	737-800-1	737-800-2															319-112-1
193	Changchun-Nanjing	None		321-211-1；319-132-1；320-232-1；737-700-1	320-232-1				737-800-1	737-800-1								737-800-1														737-800-1
194	Sanya-Wuhan	One flight stops Liuzhou，737-800（China Eastern）， 1543KM		321-231-1	737-800-2	737-800-2															321-231-1				320-232-1
195	Hohhot-Hailar	One flight stops Shenyang， E 195 LR（Tianjin）, 1881KM; One flight stops Zhalantun，CRJ900（China Express）, 1440KM					737-800-1						737-800-1		737-800-1	321-211-1									E 195 LR-1；E190 LR-1		320-214-1			737-800-1			E190 LR-1	CRJ 900-2	737-800-1
196	Qingdao-Wuhan	None	320-214-1	737-800-1	737-800-2	737-800-1							320-214-1		737-800-2
197	Zhengzhou-Nanning	One flight stops Chongqing，737-700（China Southern）， 1838KM		737-700-1					320-232-1； 737-800-4				737-800-1							320-214-1																E 190 LR-2
198	Nanchang-Shenzhen	None		320-232-1；321-231-1	320-214-1	737-800-1			737-800-1；320--232-1；319-133-1			320-214-1																				737-800-1
199	Harbin-Jinan	None		320-232-1							COMACARJ 21 700-1			737-800-1	737-800-2	321-211-2；320-232-1																				320-214-1
200	Dalian-Hangzhou	One flight stops Dongying，CRJ 900 LR（China Express）, 1113KM；One flight stops Yantai，E 195 LR（Tianjin），1235		319-133-1		737-800-1				737-800-2	320-214-1				737-800-1				320-214-1						E 195 LR									CRJ 900 LR-1
201	Chengdu-Nanning	None	321-213-1	737-800-1					737-800-1		320-214-1；COMACAR J21 700-1					320-232-1																				320-214-1
202	Chengdu-Lanzhou	None	319-115-1		737-800-1；320-232-1						320-214-1					320-214-1；319-133-1	320-214-1
203	Zhengzhou-Dalian	None				737-800-2			737-800-1	737-800-1			737-800-1												320-232-1；E190 LR-1							737-800-1
204	Dalian-Xi'an	One flight stops Dongying， E 195 LR（Tianjin），1453KM	737-800-1	320-232-2； 319-133-1	320-232-1	737-800-1																			320-214-1；E 195 LR-1												737-800-1
205	Kunming-Taiyuan	One flight stops Changsha，737-800（Kunming），2290KM			737-800-2；737-700-1	737-800-1							320-214-1；737-700-1	737-800-2		320-232-1										737-800-2
206	Baoshan-Kunming	None			737-700-6									737-700-2															320-214-1
207	Haikou-Kunming	None		321-211-1		737-800-1							320-214-1；737-800-1																	737-800-1
208	Dalian-Tianjin	None	737-800-1	320-232-1		737-800-1				737-800-1															E190 LR-2； E195 LR-1									CRJ 900 LR-1
209	Dalian-Jinan	None	737-800-1	319-133-1		737-800-1				737-800-1					737-800-3；737-700-1	321-231-1									E195 LR-1
210	Guangzhou-Taiyuan	One flight stops Nanchang，E190 LR,（China Southern） 1719KM		737-800-2；E190 LR-1；737-700-1	737-800-2	737-800-2
211	Nanjing-Shenyang	None		320-214-2；737-800-1	320-232-1；320-214-1			321-211-1	320-232-1；320-271N-1	737 MAX 8-1
212	Guangzhou-Shenyang	One flight stops Zhengzhou，B737-800（9 Air）, 2728KM; One flight stops Weifang，737-800（Hainan）， 2763KM; One flight stops Changzhou， 737-800（Shenzhen）， 2760KM； One flight stops Qingdao，320-214（China Southern）， 2588KM		321-231-1；320-214-4；320-251N-1		737-800-1			737-800-2									B737-800-1
213	Hangzhou-Tianjin	One flight stops Rizhao，E190LR（Tianjin）, 1034KM	737-800-1； 319-131-1							737-800-1						320-232-1								737-800-1；737 MAX8-1	E190LR-2
214	Guiyang-Shenzhen	None	321-213-1	321-231-1；737-800-2		737-800-1
215	Baotou-Beijing	None	737-800-3			737-800-1															319-133-1
216	Nanjing-Nanning	None		737-800-1	320-232-1			320-214-1	737-800-3									737-800-1
217	Haikou-Nanjing	One flight stops Yichun，320-232（Shenzhen），1580KM		321-211-1；319-133-1		737-800-2			320-232-1									737-800-1			320-214-1
218	Harbin-Tianjin	None	737-800-1	320-214-1	320-251N-1	737-800-1										321-211-1									320-232-1					737-800-1
219	Hefei-Kunming	None			320-214-4								737-800-1											737-800-1
220	Changsha-Nanjing	None		320-214-1	320-214-2	737-700-1				737-800-1	320-214-1													737-800-1
221	Chongqing-Hefei	None			320-214-2										737-800-1					320-214-1； 320-232-2
222	Guiyang-Xiamen	None		737-800-1						737-800-3					737-800-2
223	Chengdu-Guiyang	None	321-232-1；320-214-1	737-800-1							320-214-1					320-232-1	319-115-1						E190 LR-1
224	Kunming-Wenzhou	One flight stops Wuhan，737-800（China Eastern）， 2114KM	319-131-1；320-232-1		737-800-3		737-800-1						737-800-1	737-800-1
225	Haikou-Guiyang	One flight stops Jieyang，E190LR（Tianjin）, 1987KM； One flight stops Libo， CRJ900LR（China Express）, 1176KM; One flight stops Beihai（Colorful Guizhou）， E190LR, 812KM	320-214-2	320-232-1		737-800-1															320-214-2；319-132-2		E190LR-1		E190LR-1								737-800-1	CRJ900LR-1
226	Shenyang-Wuhan	One flight stops Yancheng，737-800（China Eastern）， 1595KM	320-214-1	737-800-1；320-271N-1	737-800-1	737-800-1			737-800-1												319-122-1					737-800-1
227	Hangzhou-Shijiangzhuang	None				737-800-1						320-214-1									321-231-1												E190 LR-1；737-800-2
228	Zhengzhou-Fuzhou	None				737-800-1；737-700-1			320-232-1	737-800-2										320-214-1					320-232-1					737-800-1
229	Guangzhou-Harbin	One flight stops Wenzhou，737-800（9 Air）， 3279KM; One flight stops Zhengzhou， 321-231（Capital）， 3051KM； One flight stops Qingdao， 737-800（Hainan）， 2978KM； One flight stops Rizhao，320-232（China Southern）， 2740KM		320-214-2；320-232-2		737-800-1			737-800-1；320-232-1							320-232-1		737-800-1	320-214-1		321-231-1
230	Chengdu-Wenzhou	One flight stops Hefei， 320-214（Chengdu）， 2137KM; One flight stops Zunyi，320-214（Chengdu）， 1826KM	321-232-2		737-800-1						320-214-2					321-211-2	320-214-1
231	Shanghai-Wenzhou	None	321-232-1		737-800-1		737-800-5
232	Zhengzhou-Harbin	None		321-231-1；320-214-1					737-800-1	737-800-1						320-232-1； 321-211-1					321-231-1										737-800-1							320-214-1
233	Chongqing-Wuhan	One flight stops Shiyan，CRJ900LR（China Express）, 888KM	737-800-1	737-700-2	737-800-1											321-231-1				320-214-1														CRJ900LR,-1				320-232-1
234	Hangzhou-Zhuhai	None		737-800-2		737-800-2				737-800-1						320-232-1																737-800-1
235	Harbin-Yantai	None		321-231-1		737-800-1	737-800-1								737-800-1	321-211-1			320-214-1					737-800-1			320-214-2
236	Changchun-Qingdao	None		320-232-1；320-214-1；737-800-1；321-231-2				320-214-1		737-800-1					737-800-1
237	Sanya-Tianjin	One flight stops Wuhan，320-232（Tianjin）. 2782KM； One flight stops Guilin， 737-800（Hainan）， 2645KM; One flight stops Nantong；737-800（Okay Airways）， 2919KM； One flight stops Changsha，737-800（Xiamen）， 2751KM	737-800-1			737-800-1				737-800-1											321-231-1			737-800-1	320-232-2
238	Shenyang-Xi'an	One flight stops Rizhao，E190LR（Tianjin）, 1753KM；One flight stops Xinzhou，319-132（Capital）， 1553KM； One flight stops Shijiangzhuang，737-800（Changan）， 1571KM； One flight stops Linyi，320-232（Shenzhen）， 1756KM		320-214-3；319-115-1	319-115-1；737 MAX8 -1				320-214-1；320-232-1			320-214-1									319-132-1				E190LR-1
239	Xi'an-Zhuhai	None		737-800-1	320-232-1	737-800-2																			320-232-1												737-800-1
240	Chengdu-Shenyang	One flight stops Lianyungang，320-214（Chengdu）， 2370KM； One flight stops Ordos，319-133（Sichuan）， 2374KM； One flight stops Zhengzhou，320-214（Chengdu）， 2378KM； One flight stops Yinchuan，319-133（China Eastern）， 2736KM	321-213-1	320-214-1；320-271N-2	320-232-1；319-133-1						320-214-2					319-133-1	320-214-1
241	Hangzhou-Lanzhou	One flight stops Mianyang，320-214（LoongAir）， 2001KM	320-232-1；319-131-1		320-214-1	737-800-1				737-800-1						320-214-1	320-214-1		320-214-2
242	Shenyang-Shenzhen	One flight stops Qingdao，320-271N（China Southern）， 2770KM； One flight stops Yangzhou，320-232（Shenzhen）， 2800KM； One flight stops Hangzhou，737-800（Hainan）， 3028KM； One flight stops Shanghai，320-232（China Southern）， 2791KM		320-271N-3；320-232-1；321-231-1		737-800-1			320-271N-1；737-800-2；320-232-1
243	Shenzhen-Qingdao	One flight stops Ningbo，737-800（Hainan）， 2101KM； One flight stops Shangrao，737-800（Shandong）， 1666KM；One flight stops Nantong，737-800（Shenzhen）， 1932KM；One flight stops Ningbo，321-211（China Eastern）， 2101KM		321-231-2；320-271N-1	321-211-1	737-800-1			737-800-4						737-800-2
244	Lhasa-Xi'an	One flight stops Xining，319-133（Sichuan）， 1981KM；One flight stops Xiahe，319-133（Sichuan），2074KM			319-115-3											319-133-3	319-115-1；330-243E-2
245	Zhengzhou-Zhuhai	None		737-800-2		737-800-1									737-800-1					320-214-1												737-800-1
246	Guangzhou-Fuzhou	None		737-800-2；737-700-2						737-800-3；737-700-1
247	Nanning-Wuhan	None		737-700-1；737-800-1					737-800-1	737-800-1	320-214-1				737-800-1	321-211-1；320-232-1
248	Nanchang-Kunming	None			320-214-2；320-232-1；320-251N-1			320-214-1								320-214-1
249	Chongqing-Lijiang	None		737-700-2	737-700-1								737-700-1			320-232-1				320-214-1	320-214-1
250	Chengdu-Hefei	None	321-213-1		320-214-1； 320-232-2；319-133-1						320-214-1					321-271N-1
251	Nanjing-Taiyuan	None			737-800-1；320-214-1	737-800-1		320-214-1	320-232-1；320-214-1
252	Chongqing-Nanning	One flight stops Tongren， CRJ 900LR（China Express）, 1237KM		737-800-2					737-800-1							319-133-1																	737-800-1	CRJ 900LR-1		320-214-1
253	Changsha-Qingdao	None		321-231-1										737-800-1	737-800-1；737 MAX 8-1									737-800-1			320-214-1
254	Fuzhou-Xi'an	One flight stops Huaian，737-800（Changan）， 1829KM; One flight stops Nanchang，737-800（Fuzhou）， 1515KM			319-115-2					737-800-2；737-700-1																				737-800-2							737-800-1
255	Hangzhou-Guilin	None		737-700-1		737-800-1				737-800-1					737-800-2						321-231-1；320-232-1
256	Chongqing-Zhuhai	One flight stops Liuzhou，CRJ900LR（China Express）, 1116KM	737-800-1；737-700-1	737-800-1											737-800-1					320-214-1												737-800-1		CRJ900LR-1				320-232-1
257	Urumqi-Wuhan	One flight stops Xi'an，737-800（China Eastern）， 3041KM； One flight stops Yinchuan，737-800（China Eastern）， 2889KM		320-232-1；737-800-1；737-700-1	737-800-2	737-800-2																			320-214-1			737-800-1
258	Hohhot-Shanghai	One flight stops Taiyuan，737-800（China Eastern）， 1589KM	321-232-2		737-800-1；319-115-1；320-251N-1	737-800-1	737-800-1	321-211-1
259	Chongqing-Fuzhou	One flight stops Wuhan，320-214（West Air）， 1581KM；One flight stops Hengyang，320-232-1（Chongqing），1376KM；One flight stops Ganzhou，737-800（Xiamen），1786	737-800-1			737-800-1				737-800-3										320-214-1																		320-232-1
260	Xishuangbanna-Lijiang	None									319-115-1		319-115-1； 320-214-1						320-214-1							737-700-1
261	Changsha-Jinan	None	737-800-1	320-214-1		737-800-2			737-800-1	737-800-1					737-800-2
262	Guangzhou-Changchun	One flight stops Weihai，737-800（China Eastern）， 2872KM； One flight stops Nanjing（9 Air），737-800， 2788KM; One flight stops Yangzhou，320-214（Shenzhen）， 2772KM		320-214-1；320-232-4	737-800-1				320-214-1；320-232-1									737-800-1
263	Haikou-Nanning	None		737-800-1	319-115-1	737-800-2															320-214-1			737-800-1								737-800-1				320-214-1
264	Hangzhou-Wuhan	None		737-800-3						737-800-2									320-214-1
265	Chengdu-Wuxi	None			321-211-1				737-800-3							321-211-1
266	Chengdu-Taiyuan	None	319-115-1		737-800-1； 320-232-1				320-214-1		320-214-1					320-214-1
267	Hefei-Xiamen	None		321-231-1	320-214-2	737-800-1				737-800-1					737-800-2						320-232-1
268	Fuzhou-Guiyang	One flight stops Liupanshui，E190 LR（Tianjin）, 1676KM								737-800-2	320-214-1												E190 LR-1		E190 LR-1		320-214-1			737-800-1
269	Chengdu-Haikou	None	321-213-1			330-343E-1；737 MAX8-1							737-800-1			321-211-1
270	Korla-Urumqi	None		737 MAX8-3； 321-231-1； 737-700-1；E190 LR-1																					E195 LR-2
271	Hohhot-Xi'an	One flight stops Bayan Zhuoer，E190 LR（Tianjin）, 1361KM； One flight stops Alxa Zuoqi，CRJ 900 LR（China Express）, 1197KM		320-232-1	319-115-1；320-232-1														320-214-1						E190 LR-4					737-800-1				CRJ 900 LR-2
272	Ningbo-Shenzhen	None		321-231-3	321-211-1	737-800-1
273	Nanjing-Sanya	Two flights stop Changsha，320-214（Chengdu；China Eastern）， 2197KM		321-211-1	320-232-1；320-214-1	737-800-2					320-214-1										321-231-1
274	Chongqing-Taiyuan	One flight stops Changzhi，CRJ900 LR（China Express）, 1162KM			737-800-2	737-800-1									737-800-1	321-231-1				320-232-1														CRJ900 LR-1
275	Haikou-Xi'an	One flight stops Zhuhai，737 MAX8（Hainan）, 2237KM； One flight stops Nanning， 319-115（China Eastern）, 2243KM； One flight stops Anshun，E190 LR（Tianjin）, 1795KM; One flight stops Liuzhou，319-115（China Eastern）， 1624KM; One flight stops Zunyi，321-211（Juneyao ）， 1735KM; One flight stops Guiyang，319-132（Capital）， 1843KM; One flight stops Chongqing，320-232（Sichuan）， 1856KM			319-115-2	737 MAX8-1；737-800-1		321-211-1								320-232-1		737-800-1			319-132-1				E190 LR-1												737-800-1
276	Zhengzhou-Wenzhou	None		737-700-1	320-214-1	737-800-1	737-800-1													320-214-1					320-214-1
277	Chongqing-Qingdao	One flight stops Nanjing，320-232（China Eastern）， 1857KM			320-232-1										737-800-4	320-232-1				320-214-1																		320-233-1
278	Chongqing-Wenzhou	One flight stops Changsha，320-232（Sichuan）， 1505KM	319-131-1			737-800-1										320-232-1									320-232-1													320-232-2
279	Guangzhou-Guiyang	None		737-800-4；319-132-1														737-800-1
280	Jinan-Xiamen	None								737 MAX8 -2					737-800-5
281	Dalian-Qingdao	None	737-800-1	320-232-1	737-800-1										737-800-3；737-700-1
282	Harbin-Shenzhen	One flight stops Hangzhou，321-211（China Southern）， 3270KM； One flight stops Huaian，320-214（Spring ）， 2861KM；One flight stops Handan，737-800（Donghai），3051；One flight stops Ulanqab，320-214（LoongAir）； One flight stops Nanjing，737-800（Hainan）， 3282KM; One flight stops Ningbo，321-231（China Southern）， 3272KM； One flight stops Fuzhou，737-800（Xiamen）， 3237KM		320-232-2；321-211-1； 321-231-1		737-800-1			320-214-1；737-800-1；320-271N-1	737-800-1		320-214-1							320-214-1													737-800-1
283	Kunming-Puer	None			737-700-6								737-700-2	737-700-1
284	Guangzhou-Shijiangzhuang	One flight stops Tongren，737-800（Hainan）， 2041KM		737-800-1		737-800-2						320-214-2																					737-800-1
285	Zhengzhou-Quanzhou	None								737-800-2			737-800-1							320-214-2												737-800-1
286	Fuzhou-Nanjing	None	737-800-1			737-800-1			320-214-1	737 MAX8-1；737-800-3																							E 190 LR-1
287	Wenzhou-Xi'an	One flight stops Yichang， 737-800（Changan）, 1710KM; One flight stops Fuyang，E190 LR（Tianjin）, 1653KM	319-131-1		737-800-1；320-214-1；319-115-1	737-800-1																			E190 LR-1												737-800-1
288	Ningbo-Qingdao	None			320-232-1； 321-211-1	737-800-1									737-800-3
289	Guangzhou-Lanzhou	None		737-800-1	320-214-1	737-800-1												737-800-2
290	Hohhot-Tongliao	None	737-700-1	737-700-1																					E190 LR-2									CRJ 900 LR-5
291	Changsha-Ningbo	None		737-800-1		737-800-1					320-214-1								320-214-1	320-214-1
292	Wenzhou-Wuhan	None		737-800-1	737-800-2	737-800-1					320-214-1
293	Guangzhou-Yiwu	None		737-800-5
294	Chengdu-Shijiangzhuang	One flight stops Ordos，737-800（China United）， 1651KM									320-214-1	320-214-1				320-232-1；321-231-1						737-800-1											737-800-1
295	Nanchang-Shanghai	None			321-211-2；320-214-1		737-800-1		319-115-1
296	Tianjin-Wuhan	None	320-214-1	737-800-1						737-800-1															320-214-1；320-271N-1
297	Sanya-Jinan	One flight stops Zhuhai，737-800（Hainan）， 2319KM				737-800-1									737-800-1	321-231-1				320-232-1	321-231-1
298	Chengdu-Xining		320-232-1	319-133-1； 320-214-2							319-115-1					320-214-1
299	Qingdao-Xiamen	One flight stops Zhoushan，737-800（Shandong）， 1526KM		320-232-1						737-800-2；787-9-1					737-800-3
300	Yinchuan-Shanghai	One flight stops Qingyang，320-214（Spring）， 1746KM； One flight stops Linfen，737-800（Shanghai）， 1656KM	321-232-2		321-231-2		737-800-1	320-214-1				320-214-1
301	Ordos-Beijing	None	737-800-2
302	Kunming-Shijiangzhuang	One flight stops Chengdu，320-232（Sichuan）， 2068KM										320-214-1		737-800-1		320-232-1						737-800-1											737-800-2
303	Zhengzhou-Ningbo	None		737-700-2	320-214-1														320-214-1
304	Chongqing-Nanchang	None	737-800-1						320-214-1							320-232-1				320-214-1
305	Chongqing-Ningbo	One flight stops Changsha，320-214（West Air）， 1525KM; One flight stops Qianjiang，320-214（LoongAir）， 1493KM	737-700-1		320-214-1											321-231-1			320-214-1	320-214-1																		320-232-1
306	Changchun-Jinan	None		320-232-1	320-232-1										737-800-2	321-231-1																			737-800-1
307	Chongqing-Shijiangzhuang	None										320-214-1								320-214-1													737-800-2
308	Zhengzhou-Hohhot	None	737-800-1	737-700-1		737-800-2															320-232-1；321-231-1															E190 LR-1
309	Chengdu-Lijiang	None	320-214-1；319-115-1								319-115-1		737-700-1			320-214-1											320-214-1
310	Changchun-Tianjin	None		320-232-1						737-800-1						320-232-1	320-214-1								320-232-1		320-214-1
311	Guangzhou-Dalian	One flight stops Wuxi， 737-800（9 Air）， 2402KM； One flight stops Nantong，320-214（Shenzhen）， 2130KM; One flight stops Hefei，737-800（Hainan）， 2150KM		320-232-2；321-231-3；320-214-1		737-800-1			320-214-1									737-800-1
312	Zhengzhou-Qingdao	None		737-800-1	320-214-1										737-800-2					320-232-1
313	Chengdu-Fuzhou	One flight stops Changsha，320-271N（Sichuan）， 1683KM; One flight stops Zunyi，320-214（Chengdu）， 1712KM; One flight stops Tongren，319-115（Tibet）， 1651KM	321-232-1							737-800-2	320-214-1		737-700-1			320-271N-1	319-115-1
314	Harbin-Xi'an	One flight stops Tianjin，320-214（Tianjin）， 2183KM; One flight stops Jinan，320-232（Sichuan）， 2325KM; One flight stops Tangshan，320-232（Capital）， 1995KM; One flight stops Yulin，320-214（China Eastern）， 2168KM		321-231-1	321-231-1；320-214-1；319-115-1											321-211-1； 320-232-1					320-232-1				320-214-1；320-232-1
315	Guiyang-Sanya	One flight stops Zhanjiang，E190 LR（Tianjin）, 1057KM				737-800-1										321-231-1		737-800-1			319-112-1				E190 LR-1； 320-214-1
316	Guilin-Beijing	One flight stops Xi'an，321-213（Air China）， 2135KM	321-213-1；321-232-2	737-800-2																																						737-800-1
317	Fuzhou-Changsha	None			320-214-1					737-800-2						321-211-1														737-800-1
318	Nanjing-Qingdao	None			320-214-1										320-214-1；737-800-2						320-232-1						320-214-1
319	Fuzhou-Tianjin	One flight stops Zhoushan，737-800（Fuzhou）， 3869KM； One flight stops Nantong，737-800（Fuzhou）， 1479KM	737-800-1							737-800-2														737-900 ER-1						737-800-3
320	Shenzhen-Taiyuan	One flight stops Nanchang，321-231（China Southern）， 1807KM		321-231-1	737-800-1	737-800-1			320-232-1；320-214-1
321	Nanchang-Zhuhai	None				737-800-1									737-800-1；737-700-1									737-800-1					321-211-1
322	Dalian-Shenzhen	One flight stops Hefei，737-800（Air China）， 2236KM; One flight stops Ningbo（China Southern），321-231， 2407KM; One flight stops Yiwu，737-800（Donghai）， 2204KM; One flight stops Yangzhou，320-232（Shenzhen）， 2267KM	737-800-1	321-231-3；320-232-1		737-800-2			320-232-1；320-216-1																							737-800-1
323	Changsha-Taiyuan	None			737-800-1	737-800-2				737-800-1				737-800-1										737-900ER-1
324	Quanzhou-Kunming	One flight stops Zhuhai，737-800（Xiamen）， 1721KM			737-800-1				320-232-1；320-214-1；737-800-1	737-800-1			737-800-1
325	Hefei-Beijing	None	737-800-3		320-214-2
326	Shijiangzhuang-Shenzhen	None							737-900-1			320-214-1										737-800-1											737-800-1
327	Changchun-Hangzhou	One flight stops Tianjin，320-232（Sichuan）， 2246KM; One flight stops Weihai（LoongAir），320-214， 1549KM	321-232-1	319-132-1；321-231-1		737-800-1				737-800-1						320-232-1			320-214-1
328	Enshi-Wuhan	None		737-800-2	737-800-2																320-232-1
329	Beijing-Taiyuan	None	737-800-1		737-800-3；320-214-1；737-700-1
330	Chongqing-Quanzhou	One flight stops Wuhan，321-231（Sichuan）， 1661KM							320-232-1	737-800-2						321-231-1				320-214-1
331	Chengdu-Yinchuan	One flight stops Xiahe，319-133（Sichuan）， 1003KM	320-214-2；320-232-1		319-133-1						320-214-1					319-133-1；321-211-1； 330-343E-1
332	Chengdu-Nanchang	None	321-213-1		320-232-1				320-214-1							321-231-1
333	Zhengzhou-Yinchuan	None		737-800-1	320-232-1	737-800-1				737-800-1					737-800-1					320-214-1
334	Nanning-Xiamen	One flight stops Zhuhai，737-800（Shandong）， 1318KM		737-800-1						737-800-2					737-800-1									737-800-1
335	Fuzhou-Kunming	One flight stops Nanning，319-133（Sichuan）， 2123KM; One flight stops Beihai，737-700（Ruili）， 1919KM			319-115-1					737-800-2						319-133-1										737-700-1				737-800-1
336	Hefei-Xi'an	One flight stops Xiangyang，CORPMA-60（Joy Air）, 946KM		737-800-1	320-214-2																321-231-1																737-800-1				CORPMA-60-1
337	Guangzhou-Hohhot	None	737-800-1	737-800-1；319-132-1；737-700-1；320-214-1																	321-231-1
338	Nanning-Jinan	One flight stops Wuhan，737-800（Shandong）， 1989KM; One flight stops Changsha，737-800（Shenzhen）， 2084KM; One flight stops Ganzhou，320-214（Beibu Gulf ）， 2003KM; One flight stops Hengyang，737-800（Shandong）， 1843KM; One flight stops Huaihua，E190LR（Beibu Gulf）, 2197KM		737-800-1					737-800-1						737-800-3					320-232-1																320-214-2；E190 LR-1
339	Wuhan-Zhuhai	None	320-214-1	737-800-2		737-800-1
340	Nanchang-Qingdao	None			320-232-1				737-800-1						737-800-1						319-132-1						320-214-1				737-800-1
341	Shijiangzhuang-Xiamen	One flight stops Nanjing（Hebei），737-800， 1786KM										320-214-2																					737-800-3；E190 LR-1
342	Guangzhou-Nanchang	None		737 MAX8-1 ；E190 LR-1	320-214-1				737-800-1
343	Guilin-Nanjing	None		737-800-1				320-214-1；321-211-1							737-800-2						320-214-1			737-900ER-1
344	Zhengzhou-Xining	None		737-800-1	320-232-1			320-214-1		737-800-1					737-800-1					320-214-1									320-214-1
345	Wuhan-Xi'an	None		737-800-1	737-800-1；321-231-1；330-243E-1
346	Nanjing-Lanzhou	None			320-214-2；321-211-1			320-214-1	320-232-1												320-232-2
347	Changsha-Urumqi	Two flights stop Lanzhou，320-214 (China Southern) and737-800（Urumqi）， 3263KM； One flight stops Xi'an（Hainan）， 737-800， 3261KM； One flight stops Xining (China Southern)，320-214， 3194KM		737-800-2；320-214-2		737-800-2；737-700-1				737-800-1														737-800-1	320-232-1			737-800-1
348	Hefei-Zhuhai	None				737-800-1			320-214-1						737-800-1					320-214-1																				321-211-1
349	Kunming-Wuxi	Two flights stop Chongqing，320-232（China Eastern）320-214（China Eastern），2024KM			320-232-2； 320-214-1				737-800-2							320-232-1
350	Changsha-Lanzhou	One flight stops Shiyan，E190 LR(Beibu Gulf ), 1336KM		320-214-1	320-214-1					737-800-1																		737-800-1								E190 LR-1
351	Guangzhou-Lijiang	Two flights stop Kunming，319-132（China Southern）737-800（China Eastern）， 1717KM		319-132-1	737-800-1			320-214-1													320-214-2
352	Hohhot-Changsha	One flight stops Jinan，737-800 （Shandong），2209KM		321-231-1；737-800-2		737-800-1				737-800-1					737-800-1			737-800-1			320-214-1；321-231-1
353	Guilin-Xiamen	None								737-800-1					737-800-2						320-232-1
354	Haikou-Guilin	One flight stops Baise，E190 LR(Beibu Gulf )， 1036KM				737-800-1									737-800-1						320-214-1；319-133-1						320-214-1			737-800-1						E190 LR-2
355	Xi'an-Yantai	None			319-115-2										737-700-1										E 190 LR-1												737-800-1
356	Guiyang-Tianjin	One flight stops Luoyang，E190 LR (Colorful Guizhou), 1716KM； Two flights stop Xi'an，330-343E(Tianjin) and E190LR (Tianjin)，1926KM	737-800-2	737-800-1														737-800-1					E190 LR-1		E190 LR-1；330-343E-1；320-232-1
357	Xingyi-Guiyang	None																					E190 LR-1											CRJ 900-1；CRJ 900 LR-6
358	Kunming-Lanzhou	One flight stops Chongqing，320-214（Sichuan）1766KM			320-214-2	737-800-1							737-800-1			320-214-1										737-800-1
359	Haikou-Xiamen	None		320-214-1		737-800-1				737-800-2
360	Zhangjiajie-Shanghai	None			320-232-1		737-800-2	320-214-1				320-214-1																						320-214-1
361	Hangzhou-Jieyang	None		737-800-1	320-214-1							320-214-1												737-800-1	E190 LR-1
362	Dalian-Wuhan	One flight stops Qingdao，737-800(China Eastern)， 1375KM		320-232-2；321-231-1	737-800-1								737-800-1								320-214-1
363	Hangzhou-Changsha	None				737-800-1				737-800-3	320-214-1
364	Chengdu-Zhuhai	One flight stops Zhuhai，737-800（China Southern），1549KM； One flight stops Zunyi，320-214(Chengdu)，1356KM	320-271N NEO-1	737-800-2							320-214-1					321-271N-1
365	Dali-Kunming	None		319-133-1	737-700-2								319-115-1																									319-132-1
366	Changsha-Jieyang	None		737-800-1	320-214-1																												737-800-1					320-233-1	737-800-1
367	Changchun-Shijiangzhuang	None				737-800-1					320-214-1	320-214-1		737-800-1							319-132-1
368	Kunming-Sanya	None		321-231-1	737-800-1								330-343E-1
369	Fuzhou-Nanning	None								737-800-1						320-214-1																				E190 LR-1；320-214-1
370	Nanchang-Taiyuan	None		321-231-1；E190 LR-1	320-214-1				320-232-1																						737-800-1
371	Wuhan-Lanzhou	None		320-232-1	737-800-1					737-800-1																737-800-1
372	Beijing-Weihai	None	737-800-2												737-800-1
373	Chongqing-Yinchuan	One flight stops Guyuan，CRJ900 LR(China Express), 1261KM	737-800-1	321-231-1	321-231-1											321-211-1																		CRJ900 LR-1
374	Ningbo-Xi'an	One flight stops Jingdezhen，737-800（Changan），1402KM			320-214-2	737-800-1																			320-232-1												737-800-1
375	Guiyang-Jinan	One flight stops Nanchang，320-214 (Chengdu)， 2332KM； One flight stops Xiangyang，737-800（Suparna ），1510KM； One flight stops Xi'an，737-800（Shandong），1833； One flight stops Zunyi，E190LR(Colorful Guizhou), 1577KM；One flight stops Luoyang，E190 LR(Beibu Gulf ), 1554KM； One flight stops Hengyang，737-800（Shandong），1794KM									320-214-1				737-800-4；737-700-1					320-214-1			E190LR-1												737-800-1	E190LR-1
376	Hailar-Beijing	None	737-800-2			737-800-1																												737-800-1
377	Hohhot-Xilinhot	None	320-214-1																						E 190 LR-3；320-232-1
378	Lijiang-Xi'an	One flight stops Yibin，319-133(Sichuan)，1314KM； One flight stops Bijie，320-214（LoongAir）， 1364KM											320-214-1			319-133-1			320-214-1		319-112-1；319-133-1				320-232-1
379	Shijiangzhuang-Sanya	One flight stops Yichang， 737-800（Hainan）， 1443KM； One flight stops Guilin，737-800（Hebei）， 2337KM				737-800-1															321-231-2												737-800-1
380	Zhengzhou-Lanzhou	None			320-214-1		737-700-1								737-800-1																	737-800-1
381	Guangzhou-Yichang	None		737-800-1	737-800-2
382	Nanjing-Zhuhai	None		320-232-1；737-800-1	320-232-2				737-800-1
383	Hangzhou-Yantai	None	319-131-1		320-214-1	737-800-1									737-800-1				320-214-1	320-214-1					E195 LR-1
384	Chongqing-Wuxi	None		320-214-2												321-231-1
385	Shenyang-Xiamen	One flight stops Nantong，320-214（Shenzhen）， 2035KM； One flight stops Handan，320-214（Spring ）， 2451KM；One flight stops Jinan，737-800（Shandong）， 2300KM		320-214-1		737-800-1			320-214-1	737-800-2		320-214-1			737-800-1
386	Quanzhou-Wuhan	None							320-232-2	737-800-2
387	Dalian-Hefei	None	737-800-1	320-214-1		737-800-2				737-800-1
388	Nanchang-Guiyang	None									320-214-1							737-800-1					E190 LR-1								737-800-1
389	Jiamusi-Beijing	None	737-800-2			737-800-1
390	Shanghai-Zunyi	None			320-214-1			321-231-1				320-214-1
391	Guiyang-Wuhan	One flight stops Liupanshui，E190 LR(Tianjin), 1223KM； One flight stops Bijie，E190 LR(Colorful Guizhou)，1096KM	320-214-1	737-800-1；737-700-1											737-800-1								E190 LR-1		E190 LR-1
392	Zhoushan-Quanzhou	None							320-214-1	737-800-2					737-800-1
393	Haikou-Taiyuan	One flight stops Hefei，737-800（Hainan）， 2648KM； One flight stops Guilin，319-132（Capital）， 2564KM； Two flights stop Changsha，737-800( Hainan and China Eastern)， 2274KM			737-800-1	737-800-2										320-232-1					320-214-1
394	Beihai-Shanghai	None			320-214-1			321-231-1				320-214-1
395	Mianyang-Shanghai	None					737-800-1	320-214-1				320-214-1
396	Nanchang-Tianjin	None				737-800-1										320-232-1								737-800-1							737-800-2
397	Haikou-Zhuhai	None		737-800-1		737MAX8-1；737-800-1
398	Fuzhou-Qingdao	None								737-800-1					737-800-1															737-800-1
399	Shanghai Pudong-Jinan	None			320-214-1；320-232-1
400	Shanghai Hongqiao-Jinan				737-800-1										737-800-1
401	Wuxi-Xiamen	None			320-214-1				737-800-2
402	Daqing-Beijing	None	737-800-2	320-214-1
403	Jinan-Urumqi	One flight stops Lanzhou，737-800（Shandong），3331KM； One flight stops Yinchuan，737-800（Shandong），3092KM； One flight stops Hami，737-800（Urumqi）， 2702KM； One flight stops Xi'an， 737-800（China Southern）， 3206KM		737-800-2；320-232-1；		737-800-1				737-800-2					737-800-3													737-800-1
404	Shenyang-Taiyuan	None				737-800-1			320-214-1							320-214-1								737-800-1		737-700-1
405	Hohhot-Tianjin	None	737-800-1												737-800-1										E 190 LR-3
406	Shenyang-Wuxi	None			321-211-1				737-800-1									737-800-1
407	Nanchang-Jinan	None		320-232-1		737-800-1					320-214-1																				737-800-1
408	Diqing-Kunming	None			737-800-2；737-700-3								737-700-1				319-115-1
409	Haikou-Ningbo	None				737-800-1									737-800-1	320-232-1					319-132-1；320-232-1
410	Tianjin-Urumqi	One flight stops Xining，737-800(Okay Airways)， 2895KM	737-800-1	737-800-1						737-800-1														737-800-1	320-214-1；320-232-1
411	Shanghai-Zhanjiang	One flight stops Xiamen，737-700（Shanghai），1756KM			320-214-·1		737-700-2					320-214-·1
412	Dalian-Shijiangzhuang	None	737-800-1	319-132-1	320-214-1							320-214-1										737-800-1
413	Harbin-Shijiangzhuang	None		320-214-1；		737-800-1						320-214-1；	737-800-1								321-231-1
Note: 1."One flight stops Xining，737-800(Okay Airways)， 2895KM" denotes "One flight stops Xining, the aircraft type is 737-800, the airline is Okay Airways, and the flight distance is 2895KM"; 2."737-700-3" denotes three 737-700.

## Sheet: Table 4
No.	Routes	Flying distance (km)	At sea	Beijing	Tianjin	Hebei	Henan	Shandong	Shanxi	Jiangsu	Zhejiang	Shanghai	Anhui	Guangdong	Guangxi	Jiangsu	Fujian	Hubei	Hunan	Sichuan	Chongqing	Inner Mongolia	Xinjiang	Tibet	Guizhou	Yunnan	Gansu	Qinghai	Ningxia	Shaanxi	Heilongjiang	Jilin	Liaoning	Hainan
1	Beijing-Shanghai	1133		79.9	83.6	130		372.8		341.7		82.2	42.8
2	Guangzhou-Shanghai	1308									366.5	91.5		265.2		75.6	509.2
3	Shanghai-Shenzhen	1343	390.1								136.8	66.8		289.9			459.4
4	Guangzhou-Beijing	1876		37.6		293.6		605.4						235.1		456.2		248.1
5	Chengdu-Beijing	1697		70.9		324.1			461											322.8										518.2
6	Beijing-Shenzhen	2077		112.2		288.6	591.8							195.6		462.3		212.6	213.9
7	Chengdu-Shanghai	1782								223.1		144	312.4					508.3		384	210.2
8	Chongqing-Shanghai	1537								138.8		137.3	361					711.3			188.6
9	Guangzhou-Chengdu	1390												337.7	361.3					348.5					342.5
10	Chengdu-Shenzhen	1446												393.7	374.9					345.3					332.1
11	Hangzhou-Beijing	1200		104.5	43.9	160.8		373.2		405.4	112.2
12	Guangzhou-Hangzhou	1099									307.1			192.2		529.7	70
13	Shanghai-Xi'an	1351					418.9			265.6		162.5	345.7																	158.3
14	Chongqing-Shenzhen	1290												317.9	305.4						319.4				347.3
15	Xishuangbanna-Kunming	450																								450
16	Chongqing-Beijing	1640		124.2		320.4	112.4		450											126.2	216.7									290.1
17	Beijing-Xi'an	1034		123.3		268.4			435.7																					206.6
18	Guangzhou-Chongqing	1188												178	303.9						325.3				380.8
19	Shanghai-Qingdao	693	454.5					96.7		71.8		70
20	Shanghai-Xiamen	878									379.8	117.3					380.9
21	Kunming-Beijing	2266		158.5		315.7			424.1											537						416.2				414.5
22	Hangzhou-Shenzhen	1179									437.5			243.5			498
23	Kunming-Shanghai	2042								54.4	90.6	131.4	258.9			304.2			495.7						530.6	176.2
24	Beijing-Sanya	2710	82.8	162		497.2	435.9		156						453.3			294.7	431.7															196.4
25	Chengdu-Kunming	711																		214.2					121	375.8
26	Dalian-Shanghai	1051	796					142				60																					53
27	Guangzhou-Xi'an	1528												172.8	232.1			301.3	384.7		98									339.1
28	Harbin-Beijing	1010		51		145.7																442.6									75.5	239.3	55.9
29	Guangzhou-Nanjing	1255								102.7			300.2	278.3		573.8
30	Shanghai-Shenyang	1364	909.8					164.7				56.5																					233
31	Changsha-Beijing	1446		145		384.8	498.1											253.1	165
32	Shanghai-Sanya	2050									460.8	120		503.7		330.7	390.6																	244.2
33	Guangzhou-Haikou	548	202.1											228.2																				117.7
34	Beijing-Xiamen	1774		95.5	101	102.7		334		67.7			498.8			196.3	378
35	Nanjing-Shenzhen	1526								142.7			354.5	332.5		696.3
36	Dalian-Beijing	579	300.8	46.3	179.8																												52.1
37	Beijing-Urumqi	2842		102.4		189.1			168.6													1374.1	809.8				198
38	Harbin-Shanghai	1854	904.6					136.4				55.2																			73	312.8	372
39	Shenzhen-Xi'an	1415												220.7	211			256.4	349.1		97.6									280.2
40	ShanghaiPudong-Wuhan	761								247.4		77.6	290.9					145.1
41	ShanghaiHongqiao-Wuhan	681								197.4		37.6	240.9					105.1
42	Chengdu-Hangzhou	1699									215.1		54			446.7			448.1	323.2	211.9
43	Guangzhou-Kunming	1357												466.6	720.3											170.1
44	Changchun-Shanghai	1698	1041.4					141.6				54.8																				116.3	343.9
45	Shanghai-Tianjin	1133			99.7	230.3		357.2		363.8		82
46	Changsha-Shanghai	964									318.6	118.1				399.7			127.6
47	Chongqing-Hangzhou	1500									290.1					519.5			486.4		204
48	Beijing-Wuhan	1133		66.6		434.9	499.2											132.3
49	Beijing-Qingdao	646	258.8	80.4	113.6	44.7		148.5
50	Chongqing-Kunming	649																		134.2	69.6				105.9	339.3
51	Urumqi-Xi'an	2306																				526.5	619.9				850			309.6
52	Zhengzhou-Kunming	1570					366.2													328	151.6				238.2	251.4				234.6
53	Guiyang-Shanghai	1702									288.9	124.9				448.2			495.8						344.2
54	Kunming-Dehong	470																								470
55	Kashgar-Urumqi	1311																					1311
56	Haikou-Beijing	2493	88.1	132		340.5	112							174.3	474.2			360.2	472.8		126									140.5				72.4
57	Chengdu-Lhasa	1307																		487.9				819.1
58	Kunming-Shenzhen	1245												306.2	711.9					226.9
59	Hangzhou-Xi'an	1215					373.4			123	196.9		356.7																	165
60	Guangzhou-Tianjin	1910			76	454.3	431.9							246.5				247.3	454
61	Haikou-Shenzhen	603	344.3											221.7																				37
62	Kunming-Nanjing	1870								166			244.6					321.9	394						566.5	177
63	Zhengzhou-Shenzhen	1465					356.9							284.5		70		324.2	429.4
64	Kunming-Xi'an	1228																		576.3						374.3				277.4
65	Guangzhou-Zhengzhou	1389					367.6							250.7				288.2	482.5
66	Guiyang-Beijing	2039		67.3		510.4	98		365.8									311.5	128.4		93.4				304.7					159.5
67	Chengdu-Nanjing	1618								249.2			235.2					546.7		387.3	199.6
68	ShanghaiPudong-Zhuhai	1497	596.2								61.3	54		331.8			453.7
69	ShanghaiHongqiao-Zhuhai	1497									421.3	130.2		461.8			483.7
70	Chongqing-Nanjing	1305								143.4			396					564.2			201.4
71	Changchun-Beijing	933		167.3		193																363										121.1	88.6
72	Zhengzhou-Shanghai	887					218.3			272.7		47.4	348.6
73	Fuzhou-Beijing	1681		163.6		316.6		377.9		85			340.4			240.8	156.7
74	Yulin-Xi'an	480																												480
75	Zhengzhou-Haikou	1873	215.6				263							102	442.4			323.4	505.4															21.2
76	Guangzhou-Ningbo	1189									437.1			243.1			508.8
77	Hangzhou-Guiyang	1538									402.3					345			492.4						298.3
78	Kunming-Wuhan	1364																300	316.1						570.7	177.2
79	Nanchang-Beijing	1398		102.4	105.4	239.8	120.3	333.2					383.7			113.2
80	Yinchuan-Xi'an	560																									228.6		169.2	162.2
81	Zhengzhou-Chengdu	1039					317.1													398.3										323.6
82	Shanghai-Taiyuan	1099					322.1		141	290.2		45.5	300.2
83	Guangzhou-Wenzhou	1015									116.8			336.8		89	472.4
84	Chengdu-Wuhan	1047																435.3		388.6	223.1
85	Guangzhou-Wuhan	873												251.8				224.1	397.1
86	Chengdu-Sanya	1677													531.5					438.8					489.7									217
87	Chengdu-Urumqi	2258																		382.8			583.9				1291.3
88	Guangzhou-Wuxi	1365								259.1	293.7		100	86		626.2
89	Nanning-Shanghai	1750									321.4	167.5			396.1	521			344
90	Nanjing-Xi'an	1104					411.2			172.2			351.5																	169.1
91	Hangzhou-Kunming	2089									306.6					533.4			553.3						468.7	227
92	Fuzhou-Shanghai	678									404.3	127.9					145.8
93	Beijing-Lanzhou	1356		132		143			91													724					171		95
94	Harbin-Qingdao	1111						265.5																							90.7	285.4	469.4
95	Nanjing-Beijing	981		121.1		198.6		365.8		279.3			16.2
96	Guiyang-Nanjing	1550								270.4			243.8					331.1	399.1						305.6
97	Hotan-Urumqi	1341																					1341
98	ShanghaiHongqiao-Urumqi	3649					438.6			326.4		129.6	373.5										719.4				637.5	582	112.8	329.2
99	ShanghaiPudong-Urumqi	3325					352.1			326.4		62.1	373.5										719.4				607.5	512	82.8	289.2
100	Kunming-Lijiang	360																								360
101	Haikou-Changsha	1100	85.3											155.8	436.7				399.1															23.1
102	Zhengzhou-Urumqi	2747					442.6																696.7				745.1	397.1	154.9	310.6
103	Changsha-Xi'an	955																240.5	433.6		112									168.9
104	Hohhot-Beijing	444		43.4		139.3			68.1													193.2
105	Urumqi-Lanzhou	1758																					609.9				715.1	433
106	Nanning-Beijing	2250		169		434	80		366						389			250	394		86									82
107	Chongqing-Changsha	695																102	421		172
108	Chongqing-Xi'an	603																		270.2	72.9									259.9
109	Shenzhen-Wuxi	1368								148.6	396.1			386.7		358.6	78
110	Chongqing-Sanya	1517	223.9												463.8						178.2				453.6									197.5
111	Shenzhen-Tianjin	2021		141.2		417.6	518.2							224.9				169.3	549.8
112	Beijing-Shenyang	649		90.1		156.9																											402
113	Guangzhou-Sanya	747	315.5											188.9																				242.6
114	Chengdu-Tianjin	1640			129	322.1			403.5											358.9										426.5
115	Chengdu-Changsha	940																140.6	414.6	154.3	230.5
116	Xi'an-Xining	721																									417.4	115.8	120	67.8
117	Haikou-Shanghai	1762	269.1								361.7	54.9		581.4			395.6																	99.3
118	Chongqing-Haikou	1253	36.4											161.1	462.1						122.2				393.7									77.5
119	Guangzhou-Jinan	1664						306.9		36.2			491.8	251.9		577.2
120	Kunming-Xiamen	1680												492.4	535.5		232.7									419.4
121	Beijing-Yantai	575	291	49	161.9			73.1
122	Chengdu-Jinan	1419					490.2	206.2												384.4										338.2
123	Nanjing-Xiamen	929								88.9	377.5		40				422.6
124	Zhengzhou-Xiamen	1312					368						424.6			207.2	312.2
125	Changsha-Kunming	1116																	414.5						514.4	187.1
126	Yinchuan-Beijing	1107		136		128.5			62													711.4							69.1
127	Beijing-Zhuhai	2098		122.6		519.3	419.3							354.4				238.3	444.1
128	Chongqing-Tianjin	1530			59	271.7	49.1		350.3											232.4	352.3									215.2
129	Hefei-Shenzhen	1191											211.8	214.2		765
130	Shanghai-Lanzhou	1890					497.9			253.9		148.9	351.9														277.5		66.3	293.6
131	Chongqing-Xiamen	1516												346.2	264.8		298.4				145.8				460.8
132	Chongqing-Jinan	1300					460.3	152.1												260	122.4									305.2
133	Dalian-Nanjing	910	293.9					236.9		298.1			36.3																				44.8
134	Guilin-Shanghai	1389									328	148.9			137	473.5			301.6
135	Zhengzhou-Chongqing	980					161.6													335.3	85.7									397.4
136	Changsha-Tianjin	1353			131.4	354.6	448.6											231.5	186.9
137	Chengdu-Qingdao	1705					437.3	531.7												437										299
138	Changsha-Xiamen	873														420.8	247.9		204.3
139	Urumqi-Yining	551																					551
140	Tianjin-Xi'an	993			62.6	313			382																					235.4
141	ShanghaiPudong-Shijiangzhuang	1004				166.6		392.7		424		20.7
142	ShanghaiHongqiao-Shijiangzhuang	1130				166.6		392.7		424		146.7
143	ShanghaiHongqiao-Yantai	846	65.2					283.8		431.9		65.1
144	ShanghaiPudong-Yantai	711	469					134		42		66
145	Zhengzhou-Hangzhou	841					78.3			84	185.1		493.6
146	Nanchang-Xi'an	1078					200									130.9		396.8												350.3
147	Shenzhen-Jinan	1828						373.8		99.4			532	227.4		595.4
148	Guangzhou-Urumqi	3836												232.2	271.2					759			1038.5		437.9		696.2	401
149	Guiyang-Xi'an	933																		268.1	186				287.6					191.3
150	Shenzhen-Wuhan	938												204.1				215.1	518.8
151	Zhengzhou-Shenyang	1339		162		521.7	338.4																										316.9
152	Kunming-Tianjin	2210			87.7	470.3			421.7											537.7						240.6				452
153	Ningbo-Beijing	1338		141.4		225.9		354.7		467.6	148.4
154	Kunming-Jinan	2080				82	417.8	359.6												507.7						350.9				362
155	Changsha-Sanya	1398	387.3												489.6				352.6															168.5
156	Aksu-Urumqi	857																					857
157	Hangzhou-Taiyuan	1180					387.4		113.5	164.7	154.9		359.5
158	Hangzhou-Qingdao	792	408.2					94		85	92.8	112
159	Wuhan-Xiamen	910														334.5	305.3	270.2
160	Haikou-Hangzhou	1606	131.7								255.1			520.1		521.5	79.9																	97.7
161	Zhengzhou-Sanya	2120	265.8				360.1								501.3			320.3	462.9															209.6
162	Chongqing-Urumqi	2560																		570.1	115.6		729.4				704.5	440.4
163	Guilin-Xi'an	1101													104.6			147.9	482.6		142.1									223.8
164	Guiyang-Wenzhou	1480									184.2					359.9	154.4		411.4						370.1
165	Jinan-Xi'an	900				103	371.2	164.7	130.6																					130.5
166	Shanghai-Jieyang	1046									421	120.6		90.7			413.7
167	Chongqing-Lhasa	1585																		720.1	125.2			739.7
168	Nanning-Xi'an	1832													488.5						422.2				512.3					409
169	Qingdao-Xi'an	1215				82	342.9	476.5	123																					190.6
170	Tianjin-Xiamen	1729			118.1	124.4		367.4		61.5			493.4			179.1	385.1
171	Guangzhou-Xiamen	567												394.9			172.1
172	Kunming-Tengchong	431																								431
173	Guangzhou-Qingdao	1867	501.5					92			399.1			392.4			482
174	Haikou-Nanchang	1204	103.8											596.6		434.5																		69.1
175	Hangzhou-Nanning	1661									241.7				430.2	489.2			499.9
176	Beijing-Wenzhou	1596		155.8		203.7		365.5		409.4	372.6	89
177	Chifeng-Hohhot	639				363.5																275.5
178	Guangzhou-Hefei	1105											299.5	264.8		540.7
179	Quanzhou-Shanghai	828									401.6	127.4					299
180	Harbin-Nanjing	1756	275.5					335.1		320.4			73																		94	278.9	379.1
181	Xi'an-Xiamen	1932														389	362	623.9			123									434.1
182	Shenyang-Qingdao	721	208.1					183.6																									329.3
183	Sanya-Xi'an	2067	239.7												493.5					268.6	192.8				329.4					319.4				223.6
184	Beijing-Xining	1780		113		182																969.2					274.8	129.9	111.1
185	Hangzhou-Xiamen	717									320.7						396.3
186	Sanya-Shenzhen	837	80.2											529.2																				227.6
187	Chengdu-Xiamen	1911												523.9	373.7		235.2			352.6					425.6
188	Hangzhou-Harbin	2091	680.3					284			153.6	122																			132.3	351	367.8
189	Hangzhou-Shenyang	1849	592.2					248.7		465.9	144.9		101																				296.3
190	Hangzhou-Sanya	1950	309.2								358.4			450.2		562.5																		269.7
191	Zhengzhou-Guiyang	1302					335.7													264	141.8				289.5					271
192	Haikou-Wuhan	1379	24											222	315.5			232.5	495.9															89.1
193	Changchun-Nanjing	1533	323.6					192.8		360.7			82																			145	428.9
194	Sanya-Wuhan	1700	34											291.1	298.1			263.6	540.9															272.3
195	Hohhot-Hailar	1402																				1402
196	Qingdao-Wuhan	1017					555.5	329.3										132.2
197	Zhengzhou-Nanning	1557					418.4								379.1			286.7	472.8
198	Nanchang-Shenzhen	753												258.4		494.6
199	Harbin-Jinan	1425	362.1					210.2																							80.2	279.8	492.7
200	Dalian-Hangzhou	1171	544.5					287			192.8																						146.7
201	Chengdu-Nanning	1014													269.1					363.1					381.8
202	Chengdu-Lanzhou	940																		440.9							499.1
203	Zhengzhou-Dalian	988	209		92	347.3	244.7																										95
204	Dalian-Xi'an	1246	20.6		99	361.7			352.6																					364.6			47.5
205	Kunming-Taiyuan	1762							381											544.4						405.4				431.2
206	Baoshan-Kunming	373																								373
207	Haikou-Kunming	1046	90.9											166	437.1										108	170.4								73.6
208	Dalian-Tianjin	482	270.2		102.4																												109.4
209	Dalian-Jinan	670	305.3					280.4																									84.3
210	Guangzhou-Taiyuan	1722					320.5		370.5					258.6				326.2	446.2
211	Nanjing-Shenyang	1630	521.6					348.5		291.2			87.7																				381
212	Guangzhou-Shenyang	2672		156		461	487.7							246				376.9	463.3														481.1
213	Hangzhou-Tianjin	1133			48.6	121.7		386		406.2	124.5		46
214	Guiyang-Shenzhen	926												324.9	354.7										246.4
215	Baotou-Beijing	579		107.6		110.5			107.4													253.5
216	Nanjing-Nanning	1574								86.4			345.9		454.7			287.8	399.2
217	Haikou-Nanjing	1990	287.4							98.8			334.4	577.4		595.8																		96.2
218	Harbin-Tianjin	1190	86		108.9	193.8																									86	338.7	376.6
219	Hefei-Kunming	1795											166					374.7	314.8						571	368.5
220	Changsha-Nanjing	799								48.5			294.1					325.5	130.9
221	Chongqing-Hefei	1146											268.3					677.6			200.1
222	Guiyang-Xiamen	1268												487.1	382.6		169.1								229.2
223	Chengdu-Guiyang	531																		364.6					166.4
224	Kunming-Wenzhou	1926									248.8					445.9	56.8		452						479.9	242.6
225	Haikou-Guiyang	910	2.2											116.9	547.6										220.3									23
226	Shenyang-Wuhan	1859	166.5			94	490.3	469.1										225.7															413.4
227	Hangzhou-Shijiangzhuang	1076				140.3		393.8		435.5	106.4
228	Zhengzhou-Fuzhou	1192					364.2						368.8			212.8	246.2
229	Guangzhou-Harbin	3119		196		502	506.5							266.3				242	495.3			588									84.5	238.4
230	Chengdu-Wenzhou	1797									217.1					436.3			417.9	466.8	258.9
231	Shanghai-Wenzhou	418	257.1								100.9	60
232	Zhengzhou-Harbin	1662				479.5	291.3															499.4									85	306.8
233	Chongqing-Wuhan	801																603.2			197.8
234	Hangzhou-Zhuhai	1115									235.8			384		495.2
235	Harbin-Yantai	1093	236.6					75.7																							76	263.4	441.3
236	Changchun-Qingdao	1051	179.8					214.5																								162	494.7
237	Sanya-Tianjin	2514			47.5	334.6	147.8		382					123.5	405.9			312	365.9		104									82				208.8
238	Shenyang-Xi'an	1683				199.7																571.4								465.3			446.6
239	Xi'an-Zhuhai	1777												218.1	422					269	172				424.9					271
240	Chengdu-Shenyang	2346		106.7		566.7			432											387.4										422.6			430.6
241	Hangzhou-Lanzhou	1775					490.4				168.5		421.2														333.5		102	259.4
242	Shenyang-Shenzhen	2671		166		513.3	523.8							361.8		387.7		273.1	202														243.3
243	Shenzhen-Qingdao	2049	904.1					54.4			346.6			327.3			416.6
244	Lhasa-Xi'an	1980																		667.1				752.6			314.6			245.7
245	Zhengzhou-Zhuhai	1395					268.5							342.5				292.7	491.3
246	Guangzhou-Fuzhou	763												429.8			333.2
247	Nanning-Wuhan	1099													472.6			166	460.4
248	Nanchang-Kunming	1457														256.1			487.7						531.9	181.3
249	Chongqing-Lijiang	1014																		308.2	292.9				132	280.9
250	Chengdu-Hefei	1392											215					492.1		381.4	303.5
251	Nanjing-Taiyuan	974					397.8		187.5	27.6			361.1
252	Chongqing-Nanning	858													311						109.4				437.6
253	Changsha-Qingdao	1437					529.1	523										267.1	117.8
254	Fuzhou-Xi'an	1515					449				86		403			145.1	233.7													198.2
255	Hangzhou-Guilin	1230									143.1				142.3	488.2			456.4
256	Chongqing-Zhuhai	1235												274.1	349.5						227.2				384.2
257	Urumqi-Wuhan	3061																440.5				356	689				1047		142.2	386.3
258	Hohhot-Shanghai	1576					367.1		477.7	233.5		163.2	233									101.5
259	Chongqing-Fuzhou	1598														455.9	393.2		476.3		272.6
260	Xishuangbanna-Lijiang	577																								577
261	Changsha-Jinan	1228				86	493.2	225.8										248.2	174.8
262	Guangzhou-Changchun	2971		186		528.1	463.5							278				265	564.7			518.1										167.6
263	Haikou-Nanning	411	23.3											155.1	207.1																			25.5
264	Hangzhou-Wuhan	656									209.7					224.1		222.2
265	Chengdu-Wuxi	1575								161.1			328.4					494.8		382.4	208.3
266	Chengdu-Taiyuan	1173							272.1											314.3										586.6
267	Hefei-Xiamen	900											324.2			199.6	376.2
268	Fuzhou-Guiyang	1360														290.5	292.4		466.4						310.7
269	Chengdu-Haikou	1757													510.7					645.2					496.6									104.5
270	Korla-Urumqi	373																					373
271	Hohhot-Xi'an	894																				398.3								495.7
272	Ningbo-Shenzhen	1237									392.2			420.6			424.2
273	Nanjing-Sanya	2030	277.1							85			319.9	502.9		598.8																		246.3
274	Chongqing-Taiyuan	1129					102		374											284.7	86.4									281.9
275	Haikou-Xi'an	1860												183.8	490.8					242	183.1				426.7					249.1				84.5
276	Zhengzhou-Wenzhou	1245					304.6				276.3		400.1			264
277	Chongqing-Qingdao	1577					444	383.3												210	222.2									317.5
278	Chongqing-Wenzhou	1505									240.9					439.5		100.8	454.9		268.9
279	Guangzhou-Guiyang	872												169.9	370.5										331.6
280	Jinan-Xiamen	1400						270.7		60.3			494.7			190.9	383.4
281	Dalian-Qingdao	358	90.4					192.5																									75.1
282	Harbin-Shenzhen	3034		156		486.6	497.7							225.6		86		219.6	569.5			468									114.7	210.3
283	Kunming-Puer	321																								321
284	Guangzhou-Shijiangzhuang	1822				380	491.7							251.3				284.4	414.6
285	Zhengzhou-Quanzhou	1320					325						366			272.8	356.2
286	Fuzhou-Nanjing	747								127.1	426.7						193.2
287	Wenzhou-Xi'an	1601					385.9				287.6		378.2			169														380.3
288	Ningbo-Qingdao	864	614.9					43.5			141.3	64.3
289	Guangzhou-Lanzhou	2078												260.6	337.1					490.1					354.2		636
290	Hohhot-Tongliao	1090				434.4																655.6
291	Changsha-Ningbo	830									276.7		86			336			131.3
292	Wenzhou-Wuhan	750									237.4		42			282.6	44	144
293	Guangzhou-Yiwu	1107									267			332		62	446
294	Chengdu-Shijiangzhuang	1357				180			382											350.8										444.2
295	Nanchang-Shanghai	644									355.6	46.2				242.2
296	Tianjin-Wuhan	1082			43.3	474.4	449.5											114.8
297	Sanya-Jinan	2497						464.1		246			610.2	356.2		648.7																		171.8
298	Chengdu-Xining	1124																		425.4							520.3	178.3
299	Qingdao-Xiamen	1571	802.7					92.5			195.8						480
300	Yinchuan-Shanghai	2047					490.9			353.4		140.9	390.4														284.8		141.9	244.7
301	Ordos-Beijing	700		105.4		136.5			86													372.1
302	Kunming-Shijiangzhuang	2092				373.2			416.5											489.7						339.2				473.4
303	Zhengzhou-Ningbo	1060					290.9			253.2	99.5	102	314.4
304	Chongqing-Nanchang	970														220.5		43.9	475.7		229.9
305	Chongqing-Ningbo	1550									241.2		87			470.1		124	488.9		138.8
306	Changchun-Jinan	1210	353.8					310																								156.9	389.3
307	Chongqing-Shijiangzhuang	1258				110.2	89		452.2											215.7	101									289.9
308	Zhengzhou-Hohhot	695					119.6		462.3													113.1
309	Chengdu-Lijiang	734																		592.9						141.1
310	Changchun-Tianjin	1113	66		74.5	190.2																										219.7	562.6
311	Guangzhou-Dalian	2285	599.5					293.5			464.9			325.9			495.6																105.6
312	Zhengzhou-Qingdao	741					206.1	534.9
313	Chengdu-Fuzhou	1771														361.2	383.5		476.2	175.5	374.6
314	Harbin-Xi'an	2044				243.3																725.2								447.3	368	260.2
315	Guiyang-Sanya	1160	353.2												492.9										150.3									163.6
316	Guilin-Beijing	1887		184.7		405.3	455.4								108.1			292.3	441.2
317	Fuzhou-Changsha	743														392.3	227.5		123.2
318	Nanjing-Qingdao	552	17.3					166.7		270.5			97.5
319	Fuzhou-Tianjin	1622			55.4	250.2		303.3		182.9			372.3			193.5	264.4
320	Shenzhen-Taiyuan	1796					505.2		230.4					289.5				282	488.9
321	Nanchang-Zhuhai	750												305.1		444.9
322	Dalian-Shenzhen	2368	823.6					278.1			188.3			417.6			532.3																128.1
323	Changsha-Taiyuan	1174					419		289.6									291.6	173.8
324	Quanzhou-Kunming	1595												339.6	191		278.6								382.4	403.4
325	Hefei-Beijing	959		67.2		236.3		311.2		57.1			287.2
326	Shijiangzhuang-Shenzhen	1773				269.5	497.2							290				271	445.3
327	Changchun-Hangzhou	2010	919					322.9			161.2																					184.8	422.1
328	Enshi-Wuhan	479																479
329	Beijing-Taiyuan	522		185.6		225.4			111
330	Chongqing-Quanzhou	1498												429.3	296		168.3				172.4				432
331	Chengdu-Yinchuan	1207																		390.3		122					481.6		213.1
332	Chengdu-Nanchang	1240														331.8		47.5	371.9	313.9	174.9
333	Zhengzhou-Yinchuan	951					107.4		394.7													214							71.4	163.5
334	Nanning-Xiamen	1105												571.9	381.2		151.9
335	Fuzhou-Kunming	1959														396	335.3		381.5						374.9	471.3
336	Hefei-Xi'an	960					525.8						182.5																	251.7
337	Guangzhou-Hohhot	2080					319.6		489.9					257.8				326.8	472			213.9
338	Nanning-Jinan	2000					510.2	266							475.8			303.2	444.8
339	Wuhan-Zhuhai	1003												340.7				179.8	482.5
340	Nanchang-Qingdao	1319	353.1					120.6		274.8			395			175.5
341	Shijiangzhuang-Xiamen	1786				286.9		401.2					460			253.7	384.2
342	Guangzhou-Nanchang	665												287.9		377.1
343	Guilin-Nanjing	1192								94.7			282.5		150.7			254.5	409.6
344	Zhengzhou-Xining	1089					194.2																				394.8	88	132.7	279.3
345	Wuhan-Xi'an	735					223											291.7												220.3
346	Nanjing-Lanzhou	1654					479.4			212.8			325.3														238.8		122	275.7
347	Changsha-Urumqi	3261																283.6	437.3		124.1		610.2				759.9	622.4	132	291.5
348	Hefei-Zhuhai	1130											188.3	298.5		643.2
349	Kunming-Wuxi	2108								154.6			363.3					254.4	453.9						547	334.8
350	Changsha-Lanzhou	1505																227.9	322		117.9						330.8		126	380.4
351	Guangzhou-Lijiang	1717												534.08	567.8											615.12
352	Hohhot-Changsha	1487					460		468									280.1	141			137.9
353	Guilin-Xiamen	881												504	236.5		140.5
354	Haikou-Guilin	773	194.4											130.6	380.9																			67.1
355	Xi'an-Yantai	1400					499.4	566.8																						333.8
356	Guiyang-Tianjin	2030			122.4	327.6	112.8		342									345.7	182.6		137				367.9					92
357	Xingyi-Guiyang	305																							305
358	Kunming-Lanzhou	1749																		693.6						328.6	726.8
359	Haikou-Xiamen	1100	154.5											676			196.2																	73.3
360	Zhangjiajie-Shanghai	1366								299.4		148.8	353.7					297.5	266.6
361	Hangzhou-Jieyang	930									342.6			143.8			443.6
362	Dalian-Wuhan	1460	182.9			122	518.1	452.8										122.7															61.5
363	Hangzhou-Changsha	805									277					384.3			143.7
364	Chengdu-Zhuhai	1536												254.8	404.5					487.7					389
365	Dali-Kunming	275																								275
366	Changsha-Jieyang	878												398.2		106			373.8
367	Changchun-Shijiangzhuang	1110		74.1		326.6																508										135.3	66
368	Kunming-Sanya	1213	295.9												345.9											349.7								221.5
369	Fuzhou-Nanning	1455												691.9	383.3		379.8
370	Nanchang-Taiyuan	1054					489.3		235.04							134.76		194.9
371	Wuhan-Lanzhou	1275					283											297.7									261.9		102	330.4
372	Beijing-Weihai	641	139.2	67.1	62.4	155.4		216.9
373	Chongqing-Yinchuan	1163																		311.4	101.3						192		155.3	403
374	Ningbo-Xi'an	1520					536.2			245	212.8	92	269.3																	164.7
375	Guiyang-Jinan	1815					466.9	421.8										347.1	96.6		86				302.6					94
376	Hailar-Beijing	1313		123.8		264.4																924.8
377	Hohhot-Xilinhot	501																				501
378	Lijiang-Xi'an	1610																		989.3						149.8				470.9
379	Shijiangzhuang-Sanya	2550	133.2			378	537.6								492.2			314.7	488.2															206.1
380	Zhengzhou-Lanzhou	1024					328.8																				221		109	365.2
381	Guangzhou-Yichang	980												246.2				129.6	604.2
382	Nanjing-Zhuhai	1544								304.6			279.6	322.4		637.4
383	Hangzhou-Yantai	995	625.4					244.4			125.2
384	Chongqing-Wuxi	1375								143.9			284.3					716.6			230.2
385	Shenyang-Xiamen	2242	1197.1					219.8			129.9						396.8																298.4
386	Quanzhou-Wuhan	860														287.7	328.1	244.2
387	Dalian-Hefei	1045	119.6					350.8		335.9			165.7																				73
388	Nanchang-Guiyang	928														154.9			534.6						238.5
389	Jiamusi-Beijing	1395		98.7		166.6																405.5									350.2	292.2	81.8
390	Shanghai-Zunyi	1600								327		108.9	345.8					356.2	320.1						142
391	Guiyang-Wuhan	925																279.1	328.7						317.2
392	Zhoushan-Quanzhou	813									442.1						370.9
393	Haikou-Taiyuan	2270	22.8				108.9		341					142.7	430.6			374.9	480.8		142									133				93.3
394	Beihai-Shanghai	1670									383.7	148.8		452	191.9		493.6
395	Mianyang-Shanghai	1809								263		131.4	353.6					543.7		353.5	163.8
396	Nanchang-Tianjin	1370			77.4	167.6		428		147.4	182		254.3			113.3
397	Haikou-Zhuhai	460	187.8											186.4																				85.8
398	Fuzhou-Qingdao	1333	936					87.5			96.1						213.4
399	Shanghai Pudong-Jinan	750						281.8		390.2		78
400	Shanghai Hongqiao-Jinan	852						311.8		430.2		110
401	Wuxi-Xiamen	803								133.2	358						311.8
402	Daqing-Beijing	1100		115		123																466.3									190.3	205.4
403	Jinan-Urumqi	3206				128.7	364	285.8	144														709.3				718.8	483	102	270.4
404	Shenyang-Taiyuan	1171		121.1		451.1			138.5																								460.3
405	Hohhot-Tianjin	612		87.8	136.8	183.3																204.1
406	Shenyang-Wuxi	1168	326.7					275.1		297.2																							269
407	Nanchang-Jinan	1404						254.8		122.9			571.5			454.8
408	Diqing-Kunming	552																								552
409	Haikou-Ningbo	1620	243.6								353.7			490			435.8																	96.9
410	Tianjin-Urumqi	3022		125	124.5	242.1			155.7													1374.3	778.4				222
411	Shanghai-Zhanjiang	1579									356.5	72.1		629.4		365	156
412	Dalian-Shijiangzhuang	780	266.8		139	276																											98.2
413	Harbin-Shijiangzhuang	1464		92.8		493.1																359.2									177.4	237.3	104.2
Note: Data blank represents that the routes do not go through the PAR.

## Sheet: Table 5
No.	Routes	Overall emissions (tons)	Route emissions (tons)	LTO emissions (tons)	At sea	Beijing	Tianjin	Hebei	Henan	Shandong	Shanxi	Jiangsu	Zhejiang	Shanghai	Anhui	Guangdong	Guangxi	Jiangsu	Fujian	Hubei	Hunan	Sichuan	Chongqing	Inner Mongolia	Xinjiang	Tibet	Guizhou	Yunnan	Gansu	Qinghai	Ningxia	Shaanxi	Heilongjiang	Jilin	Liaoning	Hainan
1	Beijing-Shanghai	1.27737e+06	945504	331864	0	230613	68364.4	111038	6574.93	304859	1661.35	282583	0	232996	38677	0	0	0	0	0	0	0	0	0	0	0	0	0	0	0	0	0	0	0	0	0
2	Guangzhou-Shanghai	857445	705818	151627	0	0	0	0	0	0	0	0	197769	125188	0	218920	0	40795	274772	0	0	0	0	0	0	0	0	0	0	0	0	0	0	0	0	0
3	Shanghai-Shenzhen	887309	712680	174629	185309	0	0	0	0	0	0	0	82343.9	118571	5437.12	237815	0	26564.8	231269	0	0	0	0	0	0	0	0	0	0	0	0	0	0	0	0	0
4	Guangzhou-Beijing	1.22137e+06	1.08983e+06	131540	0	87613.2	0	170563	0	351698	0	0	0	0	0	202348	0	265023	0	144130	0	0	0	0	0	0	0	0	0	0	0	0	0	0	0	0
5	Chengdu-Beijing	848525	724537	123988	0	92264.9	0	138375	0	0	196825	0	0	0	0	0	0	0	0	0	0	199814	0	0	0	0	0	0	0	0	0	221246	0	0	0	0
6	Beijing-Shenzhen	949673	832347	117326	0	100511	0	115580	232820	5986.03	0	0	0	0	1358.66	135777	0	189792	0	85809.6	82038.6	0	0	0	0	0	0	0	0	0	0	0	0	0	0	0
7	Chengdu-Shanghai	719277	600113	119164	0	0	0	0	0	0	0	75289.9		105945	109283					171105	0	186708	70946.6	0	0	0	0	0	0	0	0	0	0	0	0	0
8	Chongqing-Shanghai	455192	379185	76007.1	0	0	0	0	0	0	0	33158.1	1826.42	70588.2	89055.9	0	0	1283.41	0	173979	1480	1734.46	82086.2	0	0	0	0	0	0	0	0	0	0	0	0	0
9	Guangzhou-Chengdu	406661	344473	62187.6	0	0	0	0	0	0	0	0	0	0	0	114784	89538.3	0	0	0	0	117460	0	0	0	0	84879.2	0	0	0	0	0	0	0	0	0
10	Chengdu-Shenzhen	452934	388507	64427	0	0	0	0	0	0	0	0	0	0	0	136440	100567	2083.16	0	0	0	122975	1006.17	0	0	0	89862	0	0	0	0	0	0	0	0	0
11	Hangzhou-Beijing	476562	393566	82995.9	0	75771	14398	52737.9	0	122399	0	132960	78296.4	0	0	0	0	0	0	0	0	0	0	0	0	0	0	0	0	0	0	0	0	0	0	0
12	Guangzhou-Hangzhou	294350	240488	53861.7	0	0	0	0	0	0	0	0	94131.8	0	0	68988.9	0	115911	15317.7	0	0	0	0	0	0	0	0	0	0	0	0	0	0	0	0	0
13	Shanghai-Xi'an	446601	346951	99650.8	0	0	0	0	109624	0	0	71641.5	0	89571.7	86314.3	0	0	0	0	0	0	0	0	0	0	0	0	0	0	0	0	89449.7	0	0	0	0
14	Chongqing-Shenzhen	341752	296255	45496.6	0	0	0	0	0	0	0	0	0	0	0	95755.7	70136.7	0	0	0	0	0	96100.2	0	0	0	79759.2	0	0	0	0	0	0	0	0	0
15	Xishuangbanna-Kunming	273896	140595	133301	0	0	0	0	0	0	0	0	0	0	0	0	0	0	0	0	0	0	0	0	0	0	0	273896	0	0	0	0	0	0	0	0
16	Chongqing-Beijing	430154	366216	63938.2	0	56676.4	0	69107.3	22933.1	0	100728	0	0	0	0	0	0	0	0	0	0	30506.2	76254.6	1711.55	0	0	0	0	2346.69	0	5580.66	64309.4	0	0	0	0
17	Beijing-Xi'an	314098	243724	70373.3	0	64249.7	0	63264.6	0	0	102699	0	0	0	0	0	0	0	0	0	0	0	0	0	0	0	0	0	0	0	0	83884.4	0	0	0	0
18	Guangzhou-Chongqing	286385	240750	45635.4	0	0	0	0	0	0	0	0	0	0	0	58889.7	61585.8	0	0	0	0	0	88740.2	0	0	0	77169.6	0	0	0	0	0	0	0	0	0
19	Shanghai-Qingdao	242975	169755	73219.6	111333	0	0	0	0	60297.1	0	17587.9	0	53756.8	0	0	0	0	0	0	0	0	0	0	0	0	0	0	0	0	0	0	0	0	0	0
20	Shanghai-Xiamen	261887	200242	61645.3	0	0	0	0	0	0	0	0	86619.5	57574.8	0	0	0	0	86870.4	30822.6	0	0	0	0	0	0	0	0	0	0	0	0	0	0	0	0
21	Kunming-Beijing	503844	406768	97076.6	0	67958.6	0	56605.6	2917.26	0	78362.5	0	0	0	0	0	0	0	0	2853.1	0	92975.3	11308.6	0	0	0	7141.55	113460	0	0	0	70261.6	0	0	0	0
22	Hangzhou-Shenzhen	302110	251245	50865	0	0	0	0	0	0	0	0	118664	0	0	77322.4	0	0	106124	0	0	0	0	0	0	0	0	0	0	0	0	0	0	0	0	0
23	Kunming-Shanghai	429534	335540	93993.9	0	0	0	0	0	0	0	10448.8	18037.6	58881.2	42063.2	0	2035.94	46979.7	2816.78	8028.37	76862.2	2569.34	2021.19	0	0	0	87143.2	71646.2	0	0	0	0	0	0	0	0
24	Beijing-Sanya	460101	425122	34979.4	12989	42902.9	0	77996.5	68380.3	0	24472	0	0	0	0	0	71109.9	0	0	46230	67721.4	0	0	0	0	0	0	0	0	0	0	0	0	0	0	48299.3
25	Chengdu-Kunming	183686	123868	59818.6	0	0	0	0	0	0	0	0	0	0	0	0	0	0	0	0	0	67226.4	0	0	0	0	21080.2	95379.8	0	0	0	0	0	0	0	0
26	Dalian-Shanghai	246748	188536	58211.1	131445	0	0	0	0	32922.5	0	8069.44	0	38245.6	0	0	0	0	0	0	0	0	0	0	0	0	0	0	0	0	0	0	0	0	36065.4	0
27	Guangzhou-Xi'an	291243	247934	43309.1	0	0	0	0	0	0	0	0	0	0	0	49693.2	37660.7	0	0	48889.1	62421.6	0	15901.5	0	0	0	0	0	0	0	0	76677.1	0	0	0	0
28	Harbin-Beijing	213038	167674	45363.3	0	31148.4	0	24188.3	0	0	0	0	0	0	0	0	0	0	0	0	0	0	0	73477.9	0	0	0	0	0	0	0	0	35215.7	39727.2	9280.19	0
29	Guangzhou-Nanjing	248036	207448	40588.1	0	0	0	0	0	0	0	37270.1	0	0	49622.3	66296.3	0	94847.6	0	0	0	0	0	0	0	0	0	0	0	0	0	0	0	0	0	0
30	Shanghai-Shenyang	281424	232434	48989.8	155035	0	0	0	0	28065.9	0	0	0	34122.9	0	0	0	0	0	0	0	0	0	0	0	0	0	0	0	0	0	0	0	0	64199.5	0
31	Changsha-Beijing	261298	234917	26381.4	0	36747.4	0	62514.5	80921.2	0	0	0	0	0	0	0	0	0	0	41118.5	39996.6	0	0	0	0	0	0	0	0	0	0	0	0	0	0	0
32	Shanghai-Sanya	301358	261722	39635.4	3578.77	0	0	0	0	0	0	0	60937	33787.1	0	63791.6	0	39111	50486.8	0	0	0	0	0	0	0	0	0	0	0	0	0	0	0	0	49665.4
33	Guangzhou-Haikou	108301	85699.3	22601.9	31605.5	0	0	0	0	0	0	0	0	0	0	46988.2	0	0	0	0	0	0	0	0	0	0	0	0	0	0	0	0	0	0	0	29707.6
34	Beijing-Xiamen	311227	262808	48418.6	878.719	34175	13199	17292.4	0	52848.3	0	14386.2	5868.42	1001.32	71611.4	0	0	26189.3	73776.5	0	0	0	0	0	0	0	0	0	0	0	0	0	0	0	0	0
35	Nanjing-Shenzhen	296038	251398	44639.7	0	0	0	0	0	0	0	45828.7	0	0	58401.5	77097	0	114711	0	0	0	0	0	0	0	0	0	0	0	0	0	0	0	0	0	0
36	Dalian-Beijing	123858	90378.5	33479.8	46953.1	23967	28065.7	0	0	0	0	0	0	0	0	0	0	0	0	0	0	0	0	0	0	0	0	0	0	0	0	0	0	0	24872.4	0
37	Beijing-Urumqi	408965	368848	40116.8	0	32635	0	24138.3	0	0	23091.2	0	0	0	0	0	0	0	0	0	0	0	0	172370	123020	0	0	0	28390.3	0	3767.29	1553.31	0	0	0	0
38	Harbin-Shanghai	292239	247041	45197.9	109679	0	3305.48	2582.17	0	24190.1	0	4169.53	0	27497.5	0	0	0	0	0	0	0	0	0	0	0	0	0	0	0	0	0	0	29791.5	40434.5	50589.2	0
39	Shenzhen-Xi'an	291229	249559	41669.7	0	0	0	0	0	0	0	0	0	0	0	61169.2	37906.4	6107.12	0	41498.6	55210.3	2459.85	16960.8	0	0	0	5837.86	0	0	0	0	64078.8	0	0	0	0
40	ShanghaiPudong-Wuhan	104974	71812.1	33161.5	0	0	0	0	0	0	0	23346	0	23903.5	27450.9	0	0	0	0	30273.2	0	0	0	0	0	0	0	0	0	0	0	0	0	0	0	0
41	ShanghaiHongqiao-Wuhan	71018.6	38149.5	32869.1	0	0	0	0	0	0	0	12961.6	0	18903.4	15817.9	0	0	0	0	23335.6	0	0	0	0	0	0	0	0	0	0	0	0	0	0	0	0
42	Chengdu-Hangzhou	296162	246195	49966.9	0	0	0	0	2155.29	0	0	0	53154.1	0	14208.2	0	0	60081.6	0	2849.72	63561.8	69177.2	29969.3	0	0	0	0	0	0	0	0	1004.64	0	0	0	0
43	Guangzhou-Kunming	253655	198525	55129.9	0	0	0	0	0	0	0	0	0	0	0	95827.3	105378	0	0	0	0	0	0	0	0	0	0	52450.1	0	0	0	0	0	0	0	0
44	Changchun-Shanghai	245090	211080	34009.8	126032	0	0	0	0	20445	0	764.941	0	23241.5	0	0	0	0	0	0	0	0	0	0	0	0	0	0	0	0	0	0	0	30838.6	43767.7	0
45	Shanghai-Tianjin	200983	158332	42651.1	0	0	35258.2	32183.5	0	49917.2	0	50839.6	0	32784.7	0	0	0	0	0	0	0	0	0	0	0	0	0	0	0	0	0	0	0	0	0	0
46	Changsha-Shanghai	178012	138968	39044.6	0	0	0	0	0	0	0	0	45928.6	36547.3	0	0	0	57619.7	0	0	37916.8	0	0	0	0	0	0	0	0	0	0	0	0	0	0	0
47	Chongqing-Hangzhou	220095	188094	32000.4	0	0	0	0	1151.78	0	0	0	50124.7	0	3580.54	0	0	60878.7	0	5130.38	56999.8	0	42229	0	0	0	0	0	0	0	0	0	0	0	0	0
48	Beijing-Wuhan	184799	145385	39414	0	27258.1	0	53908.7	62338.9	0	5116.59	0	0	0	0	0	0	0	0	36176.6	0	0	0	0	0	0	0	0	0	0	0	0	0	0	0	0
49	Beijing-Qingdao	127810	87813.6	39996.6	35179.8	30927.5	15442.1	6076.27	0	40184.6	0	0	0	0	0	0	0	0	0	0	0	0	0	0	0	0	0	0	0	0	0	0	0	0	0	0
50	Chongqing-Kunming	145258	97359.3	47898.5	0	0	0	0	0	0	0	0	0	0	0	0	0	0	0	0	0	20355.7	33214.1	0	0	0	14307.1	77380.9	0	0	0	0	0	0	0	0
51	Urumqi-Xi'an	287392	253386	34006.8	0	0	0	0	0	0	0	0	0	0	0	0	0	0	0	0	0	0	0	57852.4	85118.6	0	0	0	93398.9	0	0	51022.6	0	0	0	0
52	Zhengzhou-Kunming	217154	178014	39139.5	0	0	0	0	61091.3	0	0	0	0	0	0	0	0	0	0	0	0	37190.2	17189.1	0	0	0	27008.3	48074.7	0	0	0	26600.1	0	0	0	0
53	Guiyang-Shanghai	214917	185868	29048.7	0	0	0	0	0	0	0	0	31549.5	28164.1	0	0	0	48946	0	0	54144.2	0	0	0	0	0	52112.9	0	0	0	0	0	0	0	0	0
54	Kunming-Dehong	175243	81430.4	93812.7	0	0	0	0	0	0	0	0	0	0	0	0	0	0	0	0	0	0	0	0	0	0	0	175243	0	0	0	0	0	0	0	0
55	Kashgar-Urumqi	192449	161063	31385.2	0	0	0	0	0	0	0	0	0	0	0	0	0	0	0	0	0	0	0	0	192449	0	0	0	0	0	0	0	0	0	0	0
56	Haikou-Beijing	241868	224808	17060.7	9443.46	17663.4	0	29161.1	9115.58	4041.5	0	380.077	0	0	8695.33	21847.3	36717.6	6074.27	0	27890.5	37323.8	0	9756.26	0	0	0	0	0	0	0	0	10879	0	0	0	12879.3
57	Chengdu-Lhasa	261948	214803	47144.9	0	0	0	0	0	0	0	0	0	0	0	0	0	0	0	0	0	103651	0	0	0	151744	0	0	0	6552.91	0	0	0	0	0	0
58	Kunming-Shenzhen	166881	133842	33039.4	0	0	0	0	0	0	0	0	0	0	0	49437.3	76531.8	0	0	0	0	24392.6	0	0	0	0	0	16519.7	0	0	0	0	0	0	0	0
59	Hangzhou-Xi'an	188452	153491	34961.9	0	0	0	0	35905.4	0	0	10494.5	35240.7	0	42231.2	0	0	0	0	20757.5	0	0	2623.35	0	0	0	0	0	1618.42	0	0	39581.5	0	0	0	0
60	Guangzhou-Tianjin	208477	181206	27270.8	0	0	20107.3	40912.8	40332.2	2511.73	0	0	0	0	0	36139.4	0	1110.96	0	25263.4	42099.4	0	0	0	0	0	0	0	0	0	0	0	0	0	0	0
61	Haikou-Shenzhen	80854.2	66068.8	14785.4	37723.9	0	0	0	0	0	0	0	0	0	0	31683.6	0	0	0	0	0	0	0	0	0	0	0	0	0	0	0	0	0	0	0	11446.7
62	Kunming-Nanjing	304761	225995	78766.2	0	0	0	0	0	0	0	54304.9	0	0	29979.3	0	0	3886.36	0	37225.4	45952.7	1334.2	1078.68	0	0	0	66538.1	64461.2	0	0	0	0	0	0	0	0
63	Zhengzhou-Shenzhen	198081	163877	34204.4	0	0	0	0	57025.4	0	0	0	0	0	0	48926.7	0	7830.28	0	36265.4	48033.2	0	0	0	0	0	0	0	0	0	0	0	0	0	0	0
64	Kunming-Xi'an	172806	135143	37663.3	0		0	0	0	0	0	0	0	0	0	0	0	0	0	0	0	63422.6	0	0	0	0	0	60023.9	0	0	0	49359.9	0	0	0	0
65	Guangzhou-Zhengzhou	152441	131054	21387.3	0	0	0	0	45377.2	0	0	0	0	0	0	34347.5	0	0	0	27192.1	45524.5	0	0	0	0	0	0	0	0	0	0	0	0	0	0	0
66	Guiyang-Beijing	203483	181747	21736.2	0	16866.9	0	45494.6	8735.26	0	32605.7	0	0	0	0	0	0	0	0	27765.6	11445	0	8325.23	0	0	0	38027.6	0	0	0	0	14217.1	0	0	0	0
67	Chengdu-Nanjing	208990	169296	39694.4	0	0	0	0	0	0	0	45921.7	0	0	24609.6	0	0	0	0	57202.7	0	60371.4	20884.7	0	0	0	0	0	0	0	0	0	0	0	0	0
68	ShanghaiPudong-Zhuhai	39175.7	31653.1	7522.58	10442.4	0	0	0	0	0	0	0	2707.15	4607.74	0	11880.5	0	0	9537.97	0	0	0	0	0	0	0	0	0	0	0	0	0	0	0	0	0
69	ShanghaiHongqiao-Zhuhai	46512.7	39181.9	7330.8	0	0	0	0	0	0	0	0	11027	7073.21	0	15752.4	0	0	12660.2	0	0	0	0	0	0	0	0	0	0	0	0	0	0	0	0	0
70	Chongqing-Nanjing	153735	122135	31599.4	0	0	0	0	0	0	0	29220.6	0	0	37061.8	0	0	0	0	52803.7	0	0	34648.8	0	0	0	0	0	0	0	0	0	0	0	0	0
71	Changchun-Beijing	160049	130530	29519.1	0	38165.4	0	27001.4	0	0	0	0	0	0	0	0	0	0	0	0	0	0	0	50785	0	0	0	0	0	0	0	0	0	31701.9	12395.5	0
72	Zhengzhou-Shanghai	143052	108142	34910	0	0	0	0	44069.9	0	0	33247.3	0	23234	42501	0	0	0	0	0	0	0	0	0	0	0	0	0	0	0	0	0	0	0	0	0
73	Fuzhou-Beijing	199532	175592	23939.5	0	29058.9	0	33071.1	0	39474.3	0	8878.85	0	0	35557.2	0	0	25153.3	28338.2	0	0	0	0	0	0	0	0	0	0	0	0	0	0	0	0	0
74	Yulin-Xi'an	117437	72778.2	44658.9	0	0	0	0	0	0	0	0	0	0	0	0	0	0	0	0	0	0	0	0	0	0	0	0	0	0	0	117437	0	0	0	0
75	Zhengzhou-Haikou	188593	171104	17489.2	16350.8	0	0	0	30981.2	0	0	0	0	0	0	11324.1	44348.4	0	0	29635.1	47330.5	0	0	0	0	0	0	0	0	0	0	0	0	0	0	8622.64
76	Guangzhou-Ningbo	127180	104080	23100.2	0	0	0	0	0	0	0	0	49811.9	0	0	32830	0	0	44538.1	0	0	0	0	0	0	0	0	0	0	0	0	0	0	0	0	0
77	Hangzhou-Guiyang	172838	147193	25644.9	0	0	0	0	0	0	0	0	47894.1	0	3078.11	0	0	29427.4	0	6748.2	44012.1	0	1208.34	0	0	0	40469.3	0	0	0	0	0	0	0	0	0
78	Kunming-Wuhan	157287	115889	41397.3	0	0	0	0	0	0	0	0	0	0	0	0	0	0	0	45853.8	24138.8	5723.45	2368.86	0	0	0	43581.2	35620.5	0	0	0	0	0	0	0	0
79	Nanchang-Beijing	132830	110545	22284.2	0	19239.3	8334.39	18961.9	9512.59	26347.4	0	0	0	0	30340.7	0	0	20093.3	0	0	0	0	0	0	0	0	0	0	0	0	0	0	0	0	0	0
80	Yinchuan-Xi'an	111962	72297.1	39665.3	0	0	0	0	0	0	0	0	0	0	0	0	0	0	0	0	0	0	0	0	0	0	0	0	29512.7	0	41676.7	40773	0	0	0	0
81	Zhengzhou-Chengdu	113372	90289.5	23082.8	0	0	0	0	39097.5	0	0	0	0	0	0	0	0	0	0	0	0	46153.8	0	0	0	0	0	0	0	0	0	28121	0	0	0	0
82	Shanghai-Taiyuan	124588	91972	32616.1	0	0	0	0	26955.6	0	28107.9	24286	0	20115.8	25122.8	0	0	0	0	0	0	0	0	0	0	0	0	0	0	0	0	0	0	0	0	0
83	Guangzhou-Wenzhou	106661	82845.3	23815.3	0	0	0	0	0	0	0	0	21441	0	0	39397.6	0	7264.27	38557.8	0	0	0	0	0	0	0	0	0	0	0	0	0	0	0	0	0
84	Chengdu-Wuhan	114654	83576.1	31077.7	0	0	0	0	0	0	0	0	0	0	0	0	0	0	0	50286.4	0	46558.6	17808.8	0	0	0	0	0	0	0	0	0	0	0	0	0
85	Guangzhou-Wuhan	139496	106270	33226	0	0	0	0	0	0	0	0	0	0	0	47264.5	0	0	0	43892.6	48338.7	0	0	0	0	0	0	0	0	0	0	0	0	0	0	0
86	Chengdu-Sanya	113896	99168	14728.5	0	0	0	0	0	0	0	0	0	0	0	0	31429.8	0	0	0	0	33312.3	0	0	0	0	28958	0	0	0	0	0	0	0	0	20196.4
87	Chengdu-Urumqi	224179	196904	27275.4	0	0	0	0	0	0	0	0	0	0	0	0	0	0	0	0	0	46100.3	0	0	63789.2	0	0	0	110113	4176.93	0	0	0	0	0	0
88	Guangzhou-Wuxi	142817	116061	26756.1	0	0	0	0	0	0	0	35408.4	24972.3	0	8502.65	20690.3	0	53243.6	0	0	0	0	0	0	0	0	0	0	0	0	0	0	0	0	0	0
89	Nanning-Shanghai	164957	138454	26503.1	0	0	0	0	0	0	0	0	25813	25146.8	0	0	43956.5	40140.6	3470.15	0	26430.2	0	0	0	0	0	0	0	0	0	0	0	0	0	0	0
90	Nanjing-Xi'an	137091	106785	30305.8	0	0	0	0	38883.8	0	0	30102.7	0	0	33239.2	0	0	0	0	0	0	0	0	0	0	0	0	0	1811.59	0	0	33053.7	0	0	0	0
91	Hangzhou-Kunming	208644	173845	34798.9	0	0	0	0	0	0	0	0	36473.6	0	4375.16	0	7074.52	41008	0	3506.28	42000.8	0	0	0	0	0	41647.4	32558	0	0	0	0	0	0	0	0
92	Fuzhou-Shanghai	118870	79939.2	38930.7	0	0	0	0	0	0	0	0	47668.8	34545.3	0	0	0	0	36655.8	0	0	0	0	0	0	0	0	0	0	0	0	0	0	0	0	0
93	Beijing-Lanzhou	142205	114272	27933.4	0	25090.5	0	12050.8	0	0	7668.68	0	0	0	0	0	0	0	0	0	0	0	0	61012.4	0	0	0	0	28377.1	0	8005.77	0	0	0	0	0
94	Harbin-Qingdao	133696	107058	26637.4	0	0	0	0	0	38902.9	0	0	0	0	0	0	0	0	0	0	0	0	0	0	0	0	0	0	0	0	0	0	22058.8	27501.8	45232.4	0
95	Nanjing-Beijing	159147	115761	43386.2	0	35983.3	0	23435.4	0	43165.5	0	54651.4	0	0	1911.65	0	0	0	0	0	0	0	0	0	0	0	0	0	0	0	0	0	0	0	0	0
96	Guiyang-Nanjing	156299	132292	24007.1	0	0	0	0	973.485	0	0	32779.3	0	0	20754.9	0	0	0	0	29059.3	31141.1	0	4123.14	0	0	0	37468.3	0	0	0	0	0	0	0	0	0
97	Hotan-Urumqi	133186	109776	23409.6	0	0	0	0	0	0	0	0	0	0	0	0	0	0	0	0	0	0	0	0	133186	0	0	0	0	0	0	0	0	0	0	0
98	ShanghaiHongqiao-Urumqi	194068	173978	20090.6	0	0	0	0	21111.1	0	0	15235.5	0	15335.5	17932	0	0	0	0	0	0	0	0	0	43159.6	0	0	0	33436.2	24776.8	5685.11	17396.6	0	0	0	0
99	ShanghaiPudong-Urumqi	113659	104284	9375.04	0	0	0	1710.2	9578.16	2022.35	1157.45	10642.3	0	5528	9458.47	0	0	0	0	0	0	0	0	8131.63	25065.3	0	0	0	18581.5	12720.9	1651.8	7411.28	0	0	0	0
100	Kunming-Lijiang	103936	49115.5	54820.5	0	0	0	0	0	0	0	0	0	0	0	0	0	0	0	0	0	0	0	0	0	0	0	103936	0	0	0	0	0	0	0	0
101	Haikou-Changsha	133954	113907	20047.2	8259.18	0	0	0	0	0	0	0	0	0	0	16769.7	45605.3	0	0	0	51931.8	0	0	0	0	0	0	0	0	0	0	0	0	0	0	11388.3
102	Zhengzhou-Urumqi	256237	228426	27810.9	0	0	0	0	50709.7	0	0	0	0	0	0	0	0	0	0	0	0	0	0	0	71839.4	0	0	0	61958.6	33020.8	12880.7	25827.9	0	0	0	0
103	Changsha-Xi'an	111490	92880.5	18609.1	0	0	0	0	0	0	0	0	0	0	0	0	0	0	0	23390.3	51475.2	0	10892.8	0	0	0	0	0	0	0	0	25731.3	0	0	0	0
104	Hohhot-Beijing	58897.5	41269.1	17628.4	0	12848.2	0	12947.7	0	0	6329.78	0	0	0	0	0	0	0	0	0	0	0	0	26771.8	0	0	0	0	0	0	0	0	0	0	0	0
105	Urumqi-Lanzhou	234249	204331	29918.4	0	0	0	0	0	0	0	0	0	0	0	0	0	0	0	0	0	0	0	0	85847.2	0	0	0	98074.5	50327.1	0	0	0	0	0	0
106	Nanning-Beijing	179761	164346	15415.3	0	20051.8	0	31700.5	5843.41	0	26733.6	0	0	0	0	0	36121.2	0	0	18260.6	28778.8	0	6281.66	0	0	0	0	0	0	0	0	5989.49	0	0	0	0
107	Chongqing-Changsha	87637.4	67320.8	20316.6	0	0	0	0	0	0	0	0	0	0	0	0	0	0	0	9118.74	51274	0	25604.1	0	0	0	1640.69	0	0	0	0	0	0	0	0	0
108	Chongqing-Xi'an	77308.3	56513.4	20794.9	0	0	0	0	0	0	0	0	0	0	0	0	0	0	0	0	0	24836.1	16574.8	0	0	0	0	0	2030.83	0	0	33866.6	0	0	0	0
109	Shenzhen-Wuxi	143872	118421	25450	0	0	0	0	0	0	0	25588.6	34288.6	0	0	46199.9	0	31042.4	6752.1	0	0	0	0	0	0	0	0	0	0	0	0	0	0	0	0	0
110	Chongqing-Sanya	118295	100839	17455.8	13798	0	0	0	0	0	0	0	0	0	0	1287.11	30062.9	0	0	0	3592.21	0	19502.8	0	0	0	28805.9	0	0	0	0	0	0	0	0	21246.3
111	Shenzhen-Tianjin	156860	134857	22003.6	477.787	7451.69	10393.6	24760.6	30461.8	2363.86	0	4375.49	0	0	1373.97	25067.4	0	3923.26	0	10914.8	35296.2	0	0	0	0	0	0	0	0	0	0	0	0	0	0	0
112	Beijing-Shenyang	79109	57812.4	21296.5	0	18674.3	0	13976.5	0	0	0	0	0	0	0	0	0	0	0	0	0	0	0	0	0	0	0	0	0	0	0	0	0	0	46458.1	0
113	Guangzhou-Sanya	83704.3	66533.1	17171.3	28100.7	0	0	0	0	0	0	0	0	0	0	25410.4	0	0	0	0	0	0	0	0	0	0	0	0	0	0	0	0	0	0	0	30193.3
114	Chengdu-Tianjin	130782	110230	20552.2	0	0	18946.6	21649.4	0	0	27120.6	0	0	0	0	0	0	0	0	0	0	34398.9	0	0	0	0	0	0	0	0	0	28666.5	0	0	0	0
115	Chengdu-Changsha	88048	69608.2	18439.8	0	0	0	0	0	0	0	0	0	0	0	0	0	0	0	10411.6	39921.6	20646	17068.8	0	0	0	0	0	0	0	0	0	0	0	0	0
116	Xi'an-Xining	107835	79346.1	28489.3	0	0	0	0	0	0	0	0	0	0	0	0	0	0	0	0	0	0	0	0	0	0	0	0	45934.9	26988.5	13206	21706.1	0	0	0	0
117	Haikou-Shanghai	130138	115424	14714.4	16948.3	0	0	0	0	0	0	0	23622.7	10394.8	0	37455.4	0	5996	23035.8	0	0	0	0	0	0	0	0	0	0	0	0	0	0	0	0	12685.1
118	Chongqing-Haikou	92058.5	82074.2	9984.31	2339.73	0	0	0	0	0	0	0	0	0	0	10706.9	31359.4	0	0	0	0	0	12344.7	0	0	0	26007.9	0	0	0	0	0	0	0	0	9300.03
119	Guangzhou-Jinan	131585	108573	23012.1	0	0	0	0	0	31530.7	0	2361.98	0	0	32089	27942	0	37661.2	0	0	0	0	0	0	0	0	0	0	0	0	0	0	0	0	0	0
120	Kunming-Xiamen	133683	110929	22754.2	0	0	0	0	0	0	0	0	0	0	0	32512.7	35358.5	0	26742	0	0	0	0	0	0	0	0	39069.6	0	0	0	0	0	0	0	0
121	Beijing-Yantai	67526.3	45067.5	22458.9	22808.1	15070	12689.4	0	0	16958.9	0	0	0	0	0	0	0	0	0	0	0	0	0	0	0	0	0	0	0	0	0	0	0	0	0	0
122	Chengdu-Jinan	128133	106347	21785.5	0	0	0	0	36738.2	26346.4	0	0	0	0	0	0	0	0	0	0	0	39701.7	0	0	0	0	0	0	0	0	0	25346.5	0	0	0	0
123	Nanjing-Xiamen	111514	83718	27795.8	0	0	0	0	0	0	0	21909.2	34018.9	0	3604.65	0	0	0	51981	0	0	0	0	0	0	0	0	0	0	0	0	0	0	0	0	0
124	Zhengzhou-Xiamen	109558	94346.6	15211.3	0	0	0	0	34068.7	0	0	0	0	0	30533.2	0	0	14899.9	30056.1	0	0	0	0	0	0	0	0	0	0	0	0	0	0	0	0	0
125	Changsha-Kunming	119093	93963.1	25129.7	0	0	0	0	0	0	0	0	0	0	0	0	0	0	0	0	43677.8	2992.7	0	0	0	0	39924.8	32497.5	0	0	0	0	0	0	0	0
126	Yinchuan-Beijing	109263	86437	22825.8	0	20846.1	0	10393.8	0	0	4370.5	0	0	0	0	0	0	0	0	0	0	0	0	57856.8	0	0	0	0	0	0	15795.6	0	0	0	0	0
127	Beijing-Zhuhai	173718	154325	19392.4	0	17533	0	35870.4	27340.3	2481.08	0	2865.96	4905.91	679.2	0	34597.8	0	0	2948.53	15538.2	28957.3	0	0	0	0	0	0	0	0	0	0	0	0	0	0	0
128	Chongqing-Tianjin	114280	96722.3	17557.5	0	0	12074.2	16340.6	5047.16	2476.02	20592.1	0	0	0	0	0	0	0	0	0	0	14893.9	29365.4	0	0	0	0	0	0	0	0	13490.5	0	0	0	0
129	Hefei-Shenzhen	114159	93925.3	20233.6	0	0	0	0	0	0	0	0	0	0	26819.9	27009.2	0	60329.9	0	0	0	0	0	0	0	0	0	0	0	0	0	0	0	0	0	0
130	Shanghai-Lanzhou	163390	132048	31341.8	0	0	0	0	39609.7	0	0	17922.8	0	22710.4	24762.4	0	0	0	0	0	0	0	0	0	0	0	0	0	32614.1	0	5233.96	20536.5	0	0	0	0
131	Chongqing-Xiamen	153266	130427	22838.4	0	0	0	0	0	0	0	0	0	0	0	25003	18941.5	5916.9	34283.3	0	10277	479.856	23491.1	0	0	0	34872.9	0	0	0	0	0	0	0	0	0
132	Chongqing-Jinan	100751	81855.4	18895.4	0	0	0	0	29738.6	19360.8	0	0	0	0	0	0	0	0	0	1224.02	0	14872	18097.8	0	0	0	0	0	0	0	0	17457.5	0	0	0	0
133	Dalian-Nanjing	111032	84820.7	26211	27394.3	0	0	0	0	22081.3	0	40891.3	0	0	3383.51	0	0	0	0	0	0	0	0	0	0	0	0	0	0	0	0	0	0	0	17281.3	0
134	Guilin-Shanghai	111452	90868.5	20583.4	0	0	0	0	0	0	0	1126.52	18707.2	18640.2	4801.16	0	18436.9	29587.7	0	0	20152.1	0	0	0	0	0	0	0	0	0	0	0	0	0	0	0
135	Zhengzhou-Chongqing	98533.5	75875.8	22657.7	0	0	0	0	23840.6	0	0	0	0	0	0	0	0	0	0	0	0	25960.4	17964.1	0	0	0	0	0	0	0	0	30768.4	0	0	0	0
136	Changsha-Tianjin	102129	84286.1	17843.1	0	0	16165.1	21363.5	27428.8	0	0	0	0	0	0	0	0	0	0	14247.4	22924.3	0	0	0	0	0	0	0	0	0	0	0	0	0	0	0
137	Chengdu-Qingdao	112990	96628.2	16361.3	0	0	0	0	24783.3	38313.9	0	0	0	0	0	0	0	0	0	0	0	32947	0	0	0	0	0	0	0	0	0	16945.4	0	0	0	0
138	Changsha-Xiamen	81204.3	65024.2	16180.1	0	0	0	0	0	0	0	0	0	0	0	0	0	31342.7	26554.5	0	23307.1	0	0	0	0	0	0	0	0	0	0	0	0	0	0	0
139	Urumqi-Yining	70945.6	48968.4	21977.2	0	0	0	0	0	0	0	0	0	0	0	0	0	0	0	0	0	0	0	0	70945.6	0	0	0	0	0	0	0	0	0	0	0
140	Tianjin-Xi'an	83877.7	68355.5	15522.2	0	636.953	11461.2	19940.5	0	0	23926.6	0	0	0	0	0	0	0	0	0	0	0	0	2997.02	0	0	0	0	0	0	0	24915.5	0	0	0	0
141	ShanghaiPudong-Shijiangzhuang	35909.9	28438.8	7471.07	0	0	0	8454.57	0	11123.4	0	12010	0	4321.87	0	0	0	0	0	0	0	0	0	0	0	0	0	0	0	0	0	0	0	0	0	0
142	ShanghaiHongqiao-Shijiangzhuang	40358.8	32904.5	7454.28	0	0	0	8578.37	0	11435	0	12346.5	0	7998.9	0	0	0	0	0	0	0	0	0	0	0	0	0	0	0	0	0	0	0	0	0	0
143	ShanghaiHongqiao-Yantai	71778.5	51988.9	19789.6	4006.71	0	0	0	0	27335	0	26541.4	0	13895.4	0	0	0	0	0	0	0	0	0	0	0	0	0	0	0	0	0	0	0	0	0	0
144	ShanghaiPudong-Yantai	31024.9	18965.9	12059	12510.6	0	0	0	0	9603.93	0	1120.35	0	7790.04	0	0	0	0	0	0	0	0	0	0	0	0	0	0	0	0	0	0	0	0	0	0
145	Zhengzhou-Hangzhou	93718.4	72503.8	21214.6	0	0	0	0	17357.6	0	0	7241.76	26565	0	42554	0	0	0	0	0	0	0	0	0	0	0	0	0	0	0	0	0	0	0	0	0
146	Nanchang-Xi'an	93157.8	72773.4	20384.4	0	0	0	0	13501.6	0	0	0	0	0	0	0	0	19029	0	26787.1	0	0	0	0	0	0	0	0	0	0	0	33840.2	0	0	0	0
147	Shenzhen-Jinan	127289	111693	15596.4	0	0	0	0	0	30637.8	0	6073.45	0	0	32505.8	21692.6	0	36379.6	0	0	0	0	0	0	0	0	0	0	0	0	0	0	0	0	0	0
148	Guangzhou-Urumqi	233399	212113	21285.9	0	0	0	0	0	0	0	0	0	0	0	23430.5	17689.1	0	0	0	0	42885.6	0	0	64645.3	0	21014	4981.23	39509.5	19243.3	0	0	0	0	0	0
149	Guiyang-Xi'an	85567.6	67427	18140.6	0	0	0	0	0	0	0	0	0	0	0	0	0	0	0	0	0	19317.3	12846.3	0	0	0	30103.2	0	0	0	0	23300.8	0	0	0	0
150	Shenzhen-Wuhan	89537.3	68989.8	20547.4	0	0	0	0	0	0	0	0	0	0	0	25285.3	0	0	0	26094.3	38157.7	0	0	0	0	0	0	0	0	0	0	0	0	0	0	0
151	Zhengzhou-Shenyang	104786	87690.7	17095.4	0	10609.3	0	34166	30709.4	0	0	0	0	0	0	0	0	0	0	0	0	0	0	0	0	0	0	0	0	0	0	0	0	0	29301.4	0
152	Kunming-Tianjin	145140	121140	23999.9	0	0	14269.8	23227.9	5157.88	0	18945.6	0	0	0	0	0	0	0	0	8887.97	0	23173.1	1988.51	0	0	0	2040.35	26058.3	0	0	0	21390.5	0	0	0	0
153	Ningbo-Beijing	105803	83410.9	22392.3	3798.53	18602.9	0	13917.5	0	24439.8	0	24564.1	19678.8	801.532	0	0	0	0	0	0	0	0	0	0	0	0	0	0	0	0	0	0	0	0	0	0
154	Kunming-Jinan	140606	118676	21930.9	0	0	0	3481.98	20942.4	27792.5	0	1341.46	0	0	3349.99	0	0	4378.76	0	0	3012.18	23784.8	2955.34	0	0	0	4070.76	28249.1	0	0	0	17247.1	0	0	0	0
155	Changsha-Sanya	111861	94567.6	17293.7	26198.9	0	0	0	0	0	0	0	0	0	0	0	33118.9	0	0	0	32498.5	0	0	0	0	0	0	0	0	0	0	0	0	0	0	20045
156	Aksu-Urumqi	93573.3	72062.1	21511.1	0	0	0	0	0	0	0	0	0	0	0	0	0	0	0	0	0	0	0	0	93573.3	0	0	0	0	0	0	0	0	0	0	0
157	Hangzhou-Taiyuan	88127.5	67821.4	20306.1	0	0	0	0	22266.1	0	16676.6	9466.26	19056.1	0	20662.5	0	0	0	0	0	0	0	0	0	0	0	0	0	0	0	0	0	0	0	0	0
158	Hangzhou-Qingdao	89868.6	67719.7	22148.9	34903	0	0	0	0	19111.9	0	7267.9	19009.3	9576.52	0	0	0	0	0	0	0	0	0	0	0	0	0	0	0	0	0	0	0	0	0	0
159	Wuhan-Xiamen	93992.1	72054.5	21937.6	0	0	0	0	0	0	0	0	0	0	0	0	0	26486	35142.7	32363.4	0	0	0	0	0	0	0	0	0	0	0	0	0	0	0	0
160	Haikou-Hangzhou	101092	91684.8	9407.59	6562.3	0	0	0	0	0	0	0	17200	0	0	25213.2	5300.9	29054.2	3707.07	0	5560.55	0	0	0	0	0	0	0	0	0	0	0	0	0	0	8494.2
161	Zhengzhou-Sanya	126405	111997	14407.5	10727.3	0	0	0	22510.4	0	0	0	0	0	3214.03	8130.75	22295.5	1337.47	2772.9	12443.3	17983.1	1232.99	1581.03	0	0	0	4202.02	0	0	0	0	1509.71	0	0	0	16464.4
162	Chongqing-Urumqi	187060	168512	18548.1	0	0	0	0	0	0	0	0	0	0	0	0	0	0	0	0	0	37400.9	16103.6	0	55525.5	0	0	0	49293.5	28736.8	0	0	0	0	0	0
163	Guilin-Xi'an	79165.3	63341.6	15823.7	0	0	0	0	0	0	0	0	0	0	0	0	13929.6	0	0	8508.83	27764.4	0	8175.15	0	0	0	0	0	0	0	0	20787.3	0	0	0	0
164	Guiyang-Wenzhou	101077	86895.6	14181.8	0	0	0	0	0	0	0	0	17905.9	0	0	0	0	21130.9	9065.32	0	24154.6	0	0	0	0	0	28820.6	0	0	0	0	0	0	0	0	0
165	Jinan-Xi'an	81766.2	63266	18500.2	0	0	0	7240.44	26093.7	20827.8	9180.6	0	0	0	0	0	0	0	0	0	0	0	0	0	0	0	0	0	0	0	0	18423.7	0	0	0	0
166	Shanghai-Jieyang	82238	60687.9	21550.2	0	0	0	0	0	0	0	0	26236.5	16495.3	0	15019.9	0	0	24486.3	0	0	0	0	0	0	0	0	0	0	0	0	0	0	0	0	0
167	Chongqing-Lhasa	128873	110063	18810.6	0	0	0	0	0	0	0	0	0	0	0	0	0	0	0	0	0	50003.9	18099.2	0	0	60770.2	0	0	0	0	0	0	0	0	0	0
168	Nanning-Xi'an	116374	101616	14758.2	0	0	0	0	0	0	0	0	0	0	0	0	33131	0	0	0	0	2013.24	22173.9	0	0	0	30215.4	0	0	0	0	28840.2	0	0	0	0
169	Qingdao-Xi'an	94181.3	74965.7	19215.6	0	0	0	5059.41	21157	39007.9	7589.12	0	0	0	0	0	0	0	0	0	0	0	0	0	0	0	0	0	0	0	0	21367.8	0	0	0	0
170	Tianjin-Xiamen	113489	97091.8	16397.4	0	0	12718	7892.28	2054.71	17900.2	0	6187.93	2768.97	2882.9	24661.5	0	0	8609.99	27812.7	0	0	0	0	0	0	0	0	0	0	0	0	0	0	0	0	0
171	Guangzhou-Xiamen	64041.5	43438.8	20602.8	0	0	0	0	0	0	0	0	0	0	0	40555.3	0	0	23486.2	0	0	0	0	0	0	0	0	0	0	0	0	0	0	0	0	0
172	Kunming-Tengchong	95575.2	42621.8	52953.4	0	0	0	0	0	0	0	0	0	0	0	0	0	0	0	0	0	0	0	0	0	0	0	95575.2	0	0	0	0	0	0	0	0
173	Guangzhou-Qingdao	141789	122097	19691.5	24728.2	0	0	0	0	15597.7	0	6169.35	19418.3	0	4707.35	31836.2	0	11869.3	27462.3	0	0	0	0	0	0	0	0	0	0	0	0	0	0	0	0	0
174	Haikou-Nanchang	107932	90373.2	17559.3	7112.87	0	0	0	0	0	0	0	0	0	0	45397.3	0	42889.6	0	0	0	0	0	0	0	0	0	0	0	0	0	0	0	0	0	12532.7
175	Hangzhou-Nanning	117316	102010	15306.2	0	0	0	0	0	0	0	0	21859.5	0	0	0	33465.2	29401.1	0	0	32590.3	0	0	0	0	0	0	0	0	0	0	0	0	0	0	0
176	Beijing-Wenzhou	108688	90134.2	18554.3	0	16761.7	0	11383.9	2765.67	17449.6	4095.98	19545.4	28183.8	4249.01	3234.17	0	0	1019.3	0	0	0	0	0	0	0	0	0	0	0	0	0	0	0	0	0	0
177	Chifeng-Hohhot	67038.7	49927.6	17111.1	0	0	0	28401.7	0	0	0	0	0	0	0	0	0	0	0	0	0	0	0	38637	0	0	0	0	0	0	0	0	0	0	0	0
178	Guangzhou-Hefei	81120.8	64758.4	16362.5	0	0	0	0	0	0	0	0	0	0	25733.4	23699.8	0	31687.6	0	0	0	0	0	0	0	0	0	0	0	0	0	0	0	0	0	0
179	Quanzhou-Shanghai	68204.6	53587.6	14617	0	0	0	0	0	0	0	0	25991.3	15553.7	0	0	0	0	26659.6	0	0	0	0	0	0	0	0	0	0	0	0	0	0	0	0	0
180	Harbin-Nanjing	135577	118652	16924.5	18615.4	0	0	0	0	22642.6	0	30111.6	0	0	4932.58	0	0	0	0	0	0	0	0	0	0	0	0	0	0	0	0	0	14813.8	18845.2	25615.6	0
181	Xi'an-Xiamen	138186	113293	24892.9	0	0	0	0	8858.88	0	0	2239.84	1608.35	0	8977.23	2017.66	1055.05	18759.3	31826.2	25047.7	1190.07	670.794	6252.35	0	0	0	1067	0	0	0	0	28615.6	0	0	0	0
182	Shenyang-Qingdao	72069.9	51569.5	20500.4	14884.3	0	0	0	0	23382.2	0	0	0	0	0	0	0	0	0	0	0	0	0	0	0	0	0	0	0	0	0	0	0	0	33803.4	0
183	Sanya-Xi'an	137744	120469	17274.5	9083.26	0	0	0	0	0	0	0	0	0	0	6354.89	26791.1	3442.27	0	3063.69	8189.74	14768.1	8815.93	0	0	0	15956.5	0	0	0	0	22358.1	0	0	0	18919.9
184	Beijing-Xining	116140	100388	15751.6	0	14248.7	0	10264.4	0	0	0	0	0	0	0	0	0	0	0	0	0	0	0	54660.8	0	0	0	0	15498.1	15201.9	6265.8	0	0	0	0	0
185	Hangzhou-Xiamen	75300.7	54617.6	20683.1	0	0	0	0	0	0	0	0	34770.9	0	0	0	0	0	40529.8	0	0	0	0	0	0	0	0	0	0	0	0	0	0	0	0	0
186	Sanya-Shenzhen	64554.4	55237.3	9317.13	5292.75	0	0	0	0	0	0	0	0	0	0	39582.8	0	0	0	0	0	0	0	0	0	0	0	0	0	0	0	0	0	0	0	19678.9
187	Chengdu-Xiamen	135315	118232	17082.5	0	0	0	0	0	0	0	0	0	0	0	26170.9	20840.7	8983.31	21071	3443.7	2894.47	27665.3	1935.38	0	0	0	22310.2	0	0	0	0	0	0	0	0	0
188	Hangzhou-Harbin	173618	152911	20707.4	45461.9	971.365	449.711	3877.08	0	22733	0	4219.77	18402.1	6550.16	0	0	0	0	0	0	0	0	0	6508.04	0	0	0	0	0	0	0	0	16560.4	24206.8	23678.2	0
189	Hangzhou-Shenyang	139985	124487	15497.4	39871	0	0	0	0	16744.2	0	31367.6	17504.4	0	6800.02	0	0	0	0	0	0	0	0	0	0	0	0	0	0	0	0	0	0	0	27697.7	0
190	Hangzhou-Sanya	121330	109176	12153.4	17311.5	0	0	0	0	0	0	0	26142.8	0	0	25205.8	0	31493.2	0	0	0	0	0	0	0	0	0	0	0	0	0	0	0	0	0	21176.7
191	Zhengzhou-Guiyang	80962.7	68126.1	12836.6	0	0	0	0	23454.1	0	0	0	0	0	0	0	0	0	0	1463.5	1666.86	12649.6	6794.38	0	0	0	21949.2	0	0	0	0	12985	0	0	0	0
192	Haikou-Wuhan	101759	82873	18885.7	4027.11	0	0	0	0	0	0	0	0	0	0	16488.9	21023.4	2123.98	3959.09	19082.6	24109.7	0	0	0	0	0	0	0	0	0	0	0	0	0	0	10943.8
193	Changchun-Nanjing	119049	98853.8	20194.8	20867	0	0	0	0	12432.5	0	33356.7	0	0	5287.68	0	0	0	0	0	0	0	0	0	0	0	0	0	0	0	0	0	0	19447.6	27657.1	0
194	Sanya-Wuhan	108056	92483.3	15572.5	1908.09	0	0	0	0	0	0	0	0	0	0	15041.3	20389.8	0	0	20174.3	29131.7	0	0	0	0	0	0	0	0	0	0	0	0	0	0	21410.5
195	Hohhot-Hailar	108812	91859.5	16952	0	0	0	2043.7	0	0	0	0	0	0	0	0	0	0	0	0	0	0	0	102491	0	0	0	0	0	0	0	0	0	460.113	3816.86	0
196	Qingdao-Wuhan	73434.6	56844.9	16589.6	0	0	0	0	31049.5	26700.9	0	0	0	0	0	0	0	0	0	15684.1	0	0	0	0	0	0	0	0	0	0	0	0	0	0	0	0
197	Zhengzhou-Nanning	112129	93179	18949.9	0	0	0	0	32017.2	0	0	0	0	0	0	0	29742.9	0	0	15089.2	24883.8	1802.89	4015.42	0	0	0	2469.04	0	0	0	0	2108.46	0	0	0	0
198	Nanchang-Shenzhen	83640.3	64851.3	18789	0	0	0	0	0	0	0	0	0	0	0	31648.9	0	51991.4	0	0	0	0	0	0	0	0	0	0	0	0	0	0	0	0	0	0
199	Harbin-Jinan	114916	98248.9	16666.9	24965.6	0	0	0	0	22826	0	0	0	0	0	0	0	0	0	0	0	0	0	0	0	0	0	0	0	0	0	0	13863	19291.3	33970	0
200	Dalian-Hangzhou	82278.1	67912.7	14365.4	30933.2	0	0	0	0	19115.8	0	2049.15	16452.2	0	110.242	0	0	0	0	0	0	0	0	0	0	0	0	0	0	0	0	0	0	0	13617.5	0
201	Chengdu-Nanning	57612.8	46529.6	11083.2	0	0	0	0	0	0	0	0	0	0	0	0	17889.8	0	0	0	0	22203.2	0	0	0	0	17519.7	0	0	0	0	0	0	0	0	0
202	Chengdu-Lanzhou	76583.2	58552.4	18030.8	0	0	0	0	0	0	0	0	0	0	0	0	0	0	0	0	0	36479	0	0	0	0	0	0	40104.2	0	0	0	0	0	0	0
203	Zhengzhou-Dalian	71645.2	61613.2	10032	13033.6	0	5737.26	21658.1	20275.9	0	0	0	0	0	0	0	0	0	0	0	0	0	0	0	0	0	0	0	0	0	0	0	0	0	10940.4	0
204	Dalian-Xi'an	80611.5	66709	13902.5	1829.73	0	4617.99	17414.5	1812.69	4175.49	17274.9	0	0	0	0	0	0	0	0	0	0	0	0	0	0	0	0	0	0	0	0	24479	0	0	9007.16	0
205	Kunming-Taiyuan	144062	118125	25936.6	0	0	0	0	2592.2	0	36325.1	0	0	0	0	0	0	0	0	1384.21	5277.55	32395.5	0	0	0	0	3025.2	37402.6	0	0	0	25659.4	0	0	0	0
206	Baoshan-Kunming	47289.5	32188.7	15100.7	0	0	0	0	0	0	0	0	0	0	0	0	0	0	0	0	0	0	0	0	0	0	0	47289.5	0	0	0	0	0	0	0	0
207	Haikou-Kunming	57407.3	48142.6	9264.73	4183.71	0	0	0	0	0	0	0	0	0	0	7640.22	20117.7	0	0	0	0	0	0	0	0	0	4970.75	12475.1	0	0	0	0	0	0	0	8019.84
208	Dalian-Tianjin	43846.1	33162.5	10683.6	18590.3	0	12387.1	0	0	0	0	0	0	0	0	0	0	0	0	0	0	0	0	0	0	0	0	0	0	0	0	0	0	0	12868.7	0
209	Dalian-Jinan	63878	48303.3	15574.7	22010.4	0	0	0	0	28002.6	0	0	0	0	0	0	0	0	0	0	0	0	0	0	0	0	0	0	0	0	0	0	0	0	13864.9	0
210	Guangzhou-Taiyuan	91863.7	78015.9	13847.8	0	0	0	0	15239.1	0	22435.6	0	0	0	0	18013.9	0	4163.96	0	14347.6	17663.4	0	0	0	0	0	0	0	0	0	0	0	0	0	0	0
211	Nanjing-Shenyang	132788	109941	22846.3	35181.3	0	0	0	0	23505.9	0	31064.2	0	0	5915.25	0	0	0	0	0	0	0	0	0	0	0	0	0	0	0	0	0	0	0	37121.1	0
212	Guangzhou-Shenyang	134967	117520	17447.2	8287.89	4269.49	0	13448.4	16103.5	9433.65	0	4179.26	2045.49	482.575	4140.25	16476.8	0	11039.7	406.526	10195.4	10812.5	0	0	0	0	0	0	0	0	0	0	0	0	0	23645.8	0
213	Hangzhou-Tianjin	82137.5	65938.7	16198.8	0	0	10293.2	7309.8	0	23320.9	0	24168.4	14558.5	0	2486.7	0	0	0	0	0	0	0	0	0	0	0	0	0	0	0	0	0	0	0	0	0
214	Guiyang-Shenzhen	64236.7	54056.9	10179.8	0	0	0	0	0	0	0	0	0	0	0	24056.5	20706.2	0	0	0	0	0	0	0	0	0	19473.9	0	0	0	0	0	0	0	0	0
215	Baotou-Beijing	43301.2	33152.5	10148.7	0	11235.4	0	6327.03	0	0	6149.53	0	0	0	0	0	0	0	0	0	0	0	0	19589.3	0	0	0	0	0	0	0	0	0	0	0	0
216	Nanjing-Nanning	96858	81654.4	15203.6	0	0	0	0	0	0	0	12084	0	0	17944.2	0	31190.3	0	0	14930.2	20709.3	0	0	0	0	0	0	0	0	0	0	0	0	0	0	0
217	Haikou-Nanjing	105705	95331.1	10373.4	12699.3	0	0	0	0	0	0	8770.77	0	0	16031.4	27728.5	0	31887.5	0	0	0	0	0	0	0	0	0	0	0	0	0	0	0	0	0	8587.09
218	Harbin-Tianjin	72272.5	59191.8	13080.7	4277.72	0	11957.2	9639.8	0	0	0	0	0	0	0	0	0	0	0	0	0	0	0	0	0	0	0	0	0	0	0	0	10818.1	16847.3	18732.5	0
219	Hefei-Kunming	113632	92290.1	21341.6	0	0	0	0	0	0	0	0	0	0	19205.7	0	0	0	0	19265.2	16185.5	0	0	0	0	0	29358	29617.3	0	0	0	0	0	0	0	0
220	Changsha-Nanjing	72415.4	54507.5	17907.8	0	0	0	0	0	0	0	12262.6	0	0	20063.4	0	0	0	0	22205.5	17883.9	0	0	0	0	0	0	0	0	0	0	0	0	0	0	0
221	Chongqing-Hefei	71157	55082.5	16074.5	0	0	0	0	0	0	0	0	0	0	20933.1	0	0	0	0	32568.8	0	0	17655.1	0	0	0	0	0	0	0	0	0	0	0	0	0
222	Guiyang-Xiamen	66810.7	55011.5	11799.2	0	0	0	0	0	0	0	0	0	0	0	21132.6	16598.9	0	13235.9	0	0	0	0	0	0	0	15843.3	0	0	0	0	0	0	0	0	0
223	Chengdu-Guiyang	51545.4	36588.7	14956.7	0	0	0	0	0	0	0	0	0	0	0	0	0	0	0	0	0	32601.2	0	0	0	0	18944.2	0	0	0	0	0	0	0	0	0
224	Kunming-Wenzhou	113829	94904	18925.1	0	0	0	0	0	0	0	0	21099	0	0	0	0	20547.8	2410.17	4608.01	21133.9	0	0	0	0	0	23929.9	20100.3	0	0	0	0	0	0	0	0
225	Haikou-Guiyang	73797.2	60695.4	13101.8	1761.64	0	0	0	0	0	0	0	0	0	0	12356	32433.5	0	0	0	0	0	0	0	0	0	20392	0	0	0	0	0	0	0	0	6854.01
226	Shenyang-Wuhan	107605	94251.7	13353.7	10504	0	0	4166.29	21731.2	22299.9	0	1821.23	0	0	2148.31	0	0	0	0	17823.7	0	0	0	0	0	0	0	0	0	0	0	0	0	0	27110.8	0
227	Hangzhou-Shijiangzhuang	71128.5	58410.2	12718.4	0	0	0	13137.9	0	21377.3	0	25315.8	11297.6	0	0	0	0	0	0	0	0	0	0	0	0	0	0	0	0	0	0	0	0	0	0	0
228	Zhengzhou-Fuzhou	66311.7	56782.9	9528.81	0	0	0	0	22113.7	0	0	0	0	0	17568.4	0	0	10137.1	16492.6	0	0	0	0	0	0	0	0	0	0	0	0	0	0	0	0	0
229	Guangzhou-Harbin	143551	128559	14992.2	8622.88	5692.73	0	15201.4	16440.2	5194.31	0	1670.2	3196.09	375.027	1398.59	16145.2	0	6827.19	1750.18	7406.63	12503.5	0	0	17112.7	0	0	0	0	0	0	0	0	8716.95	10635.1	4662.38	0
230	Chengdu-Wenzhou	98147.5	83403.3	14744.2	0	0	0	0	0	0	0	0	15913	0	3614.77	0	0	17935.8	536.135	3838.52	16504.5	24835.7	10313	0	0	0	4656.04	0	0	0	0	0	0	0	0	0
231	Shanghai-Wenzhou	48075.5	32088.7	15986.8	19736.8	0	0	0	0	0	0	0	15739.2	12599.5	0	0	0	0	0	0	0	0	0	0	0	0	0	0	0	0	0	0	0	0	0	0
232	Zhengzhou-Harbin	106916	92992.5	13923.3	0	0	0	26829.1	23260.5	0	0	0	0	0	0	0	0	0	0	0	0	0	0	27942.5	0	0	0	0	0	0	0	0	11717.6	17166.1	0	0
233	Chongqing-Wuhan	66653.6	48918.2	17735.4	0	0	0	0	0	0	0	0	0	0	0	0	0	0	0	46024.5	0	0	20629.2	0	0	0	0	0	0	0	0	0	0	0	0	0
234	Hangzhou-Zhuhai	56562.6	48238	8324.55	0	0	0	0	0	0	0	0	14363.6	0	0	20775.2	0	21423.7	0	0	0	0	0	0	0	0	0	0	0	0	0	0	0	0	0	0
235	Harbin-Yantai	75691.7	62969.9	12721.9	13631	0	0	0	0	10722.2	0	0	0	0	0	0	0	0	0	0	0	0	0	0	0	0	0	0	0	0	0	0	10739.5	15175	25424.2	0
236	Changchun-Qingdao	77751.9	62818.1	14933.8	10746.6	0	0	0	0	20287.5	0	0	0	0	0	0	0	0	0	0	0	0	0	0	0	0	0	0	0	0	0	0	0	17149.6	29568.1	0
237	Sanya-Tianjin	111937	97907	14029.7	346.485	0	6923.35	10248	9604.64	3979.26	5813.47	4177.84	0	0	1895.63	8361.98	17113.5	2461.37	0	11084.6	15075.9	0	1582.72	0	0	0	0	0	0	0	0	1247.92	0	0	0	12020
238	Shenyang-Xi'an	134309	97935.3	36373.7	2280.4	720.239	0	10596	4707.66	7378.85	3299.12	0	0	0	0	0	0	0	0	0	0	0	0	24239.6	0	0	0	0	0	0	0	40529.8	0	0	40557.3	0
239	Xi'an-Zhuhai	86171.5	76169.9	10001.7	0	0	0	0	0	824.108	0	0	0	0	0	13937.5	18088.7	0	0	0	0	11530.5	7372.66	0	0	0	18213	0	0	0	0	16205	0	0	0	0
240	Chengdu-Shenyang	119441	101728	17713.7	1533.38	3047.02	0	17375	3716.94	719.959	9984.74	2623.58	0	0	1431	0	0	0	0	2459.51	0	21926.2	682.858	10230.3	0	0	0	0	2466.39	0	1739.3	15844.4	0	0	23660.8	0
241	Hangzhou-Lanzhou	113011	97920.8	15090.1	0	0	0	0	23544.8	0	0	0	16262.3	0	20222.4	0	0	2181.51	0	653.755	2769.25	4096.64	907.64	0	0	0	0	0	25021.4	0	4897.16	12454.2	0	0	0	0
242	Shenyang-Shenzhen	143154	126598	16556.5	17059.9	4451.18	0	13763.8	14045.3	6027.6	0	5829.41	6339.6	1888.26	2192.62	21406	0	13074.9	6578.9	7322.99	5416.49	0	0	0	0	0	0	0	0	0	0	0	0	0	17757.3	0
243	Shenzhen-Qingdao	122191	103952	18239.9	35142.5	0	0	0	0	9414.41	0	5098.19	20910.9	997.18	1759.81	24022	0	4872.16	19974.3	0	0	0	0	0	0	0	0	0	0	0	0	0	0	0	0	0
244	Lhasa-Xi'an	141392	118979	22413.3	0	0	0	0	0	0	0	0	0	0	0	0	0	0	0	0	0	31421.5	0	0	0	52955.9	0	0	24134.3	9307.13	0	23573	0	0	0	0
245	Zhengzhou-Zhuhai	71721	61875.5	9845.5	0	0	0	0	16832.1	0	0	0	0	0	0	20114.4	0	0	0	12982.8	21791.7	0	0	0	0	0	0	0	0	0	0	0	0	0	0	0
246	Guangzhou-Fuzhou	63523.8	45199.1	18324.7	0	0	0	0	0	0	0	0	0	0	0	34623.1	0	0	28900.7	0	0	0	0	0	0	0	0	0	0	0	0	0	0	0	0	0
247	Nanning-Wuhan	73377.2	58176.9	15200.3	0	0	0	0	0	0	0	0	0	0	0	0	32617.8	0	0	16387.6	24371.8	0	0	0	0	0	0	0	0	0	0	0	0	0	0	0
248	Nanchang-Kunming	103741	80889.2	22851.9	0	0	0	0	0	0	0	0	0	0	0	0	0	25644	0	0	27076	0	0	0	0	0	29529.8	21491.3	0	0	0	0	0	0	0	0
249	Chongqing-Lijiang	65349.2	44401	20948.2	0	0	0	0	0	0	0	0	0	0	0	0	0	0	0	0	0	13495.5	23299.6	0	0	0	5780.01	22774.2	0	0	0	0	0	0	0	0
250	Chengdu-Hefei	85243.6	66977.9	18265.7	0	0	0	0	0	0	0	0	0	0	19477.9	0	0	0	0	23678	0	27484.4	14603.3	0	0	0	0	0	0	0	0	0	0	0	0	0
251	Nanjing-Taiyuan	78015.7	61491.6	16524.1	0	0	0	0	25114.3	0	20099.5	10004.5	0	0	22797.3	0	0	0	0	0	0	0	0	0	0	0	0	0	0	0	0	0	0	0	0	0
252	Chongqing-Nanning	62133.1	50379.9	11753.3	0	0	0	0	0	0	0	0	0	0	0	0	22934.4	0	0	256.716	2184.62	0	12286.4	0	0	0	24470.9	0	0	0	0	0	0	0	0	0
253	Changsha-Qingdao	90456.3	76568.4	13887.9	0	0	0	0	28192.3	34811.2	0	0	0	0	0	0	0	0	0	14232	13220.7	0	0	0	0	0	0	0	0	0	0	0	0	0	0	0
254	Fuzhou-Xi'an	99118.3	80550.5	18567.8	0	0	0	0	21862.2	0	0	4506.13	5571.5	0	17601.6	0	0	9178.64	19579.5	2383.69	0	0	0	0	0	0	0	0	0	0	0	18435	0	0	0	0
255	Hangzhou-Guilin	61188.9	50536.1	10652.7	0	0	0	0	0	0	0	0	11205.8	0	0	0	11172.9	20058.3	0	0	18751.8	0	0	0	0	0	0	0	0	0	0	0	0	0	0	0
256	Chongqing-Zhuhai	65461.5	53131.6	12329.8	0	0	0	0	0	0	0	0	0	0	0	17449.5	14557.6	0	117.863	0	0	0	15224.2	0	0	0	18112.3	0	0	0	0	0	0	0	0	0
257	Urumqi-Wuhan	124149	107552	16596.5	0	0	0	0	3018.08	0	0	0	0	0	0	0	0	0	0	20158.7	0	0	0	13754.5	31031.1	0	0	0	34859.1	0	5670.26	15657	0	0	0	0
258	Hohhot-Shanghai	89202.8	73425.6	15777.1	0	0	0	0	16998.4	0	23611.7	11197.1	0	14078.8	11234.9	0	0	0	0	0	0	0	0	12082	0	0	0	0	0	0	0	0	0	0	0	0
259	Chongqing-Fuzhou	84308	70240.2	14067.8	0	0	0	0	0	0	0	0	0	0	0	0	0	20291.2	20478.5	7684.24	19985.6	0	15868.5	0	0	0	0	0	0	0	0	0	0	0	0	0
260	Xishuangbanna-Lijiang	40940.6	27530.7	13410	0	0	0	0	0	0	0	0	0	0	0	0	0	0	0	0	0	0	0	0	0	0	0	40940.6	0	0	0	0	0	0	0	0
261	Changsha-Jinan	73009.9	62750.2	10259.7	0	0	0	4394.56	25202.3	16668.1	0	0	0	0	0	0	0	0	0	12682.9	14062	0	0	0	0	0	0	0	0	0	0	0	0	0	0	0
262	Guangzhou-Changchun	139505	122070	17434.7	7233.75	4912.55	0	13947.9	12241.8	4666.53	0	7973.22	2131.74	0	4035.39	18328.8	0	6222.09	2322.24	6999.06	14914.6	0	0	13683.8	0	0	0	0	0	0	0	0	0	13871.7	6019.9	0
263	Haikou-Nanning	37634.2	26796.6	10837.7	1519.12	0	0	0	0	0	0	0	0	0	0	10112.3	18921.4	0	0	0	0	0	0	0	0	0	0	0	0	0	0	0	0	0	0	7081.4
264	Hangzhou-Wuhan	52278.7	38905.6	13373.1	0	0	0	0	0	0	0	0	19123.3	0	0	0	0	13290.8	0	19864.6	0	0	0	0	0	0	0	0	0	0	0	0	0	0	0	0
265	Chengdu-Wuxi	77113.9	64861.8	12252	0	0	0	0	0	0	0	12760.5	0	0	13524.2	0	0	0	0	20376.9	0	21874.1	8578.24	0	0	0	0	0	0	0	0	0	0	0	0	0
266	Chengdu-Taiyuan	68650.4	53355.9	15294.6	0	0	0	0	0	0	20024.2	0	0	0	0	0	0	0	0	0	0	21943.7	0	0	0	0	0	0	0	0	0	26682.5	0	0	0	0
267	Hefei-Xiamen	67365.6	52813.6	14552	0	0	0	0	0	0	0	0	0	0	26300.6	0	0	11712.9	29352.1	0	0	0	0	0	0	0	0	0	0	0	0	0	0	0	0	0
268	Fuzhou-Guiyang	66397.1	55664.3	10732.8	0	0	0	0	0	0	0	0	0	0	0	0	0	11235.1	16674.1	0	18536.2	0	0	0	0	0	19951.7	0	0	0	0	0	0	0	0	0
269	Chengdu-Haikou	67313.5	62446.2	4867.26	0	0	0	0	0	0	0	0	0	0	0	0	18151	0	0	0	0	25364.9	0	0	0	0	17649.8	0	0	0	0	0	0	0	0	6147.7
270	Korla-Urumqi	41158.6	23024.9	18133.7	0	0	0	0	0	0	0	0	0	0	0	0	0	0	0	0	0	0	0	0	41158.6	0	0	0	0	0	0	0	0	0	0	0
271	Hohhot-Xi'an	72600.2	54998.7	17601.5	0	0	0	0	0	0	0	0	0	0	0	0	0	0	0	0	0	0	0	33911.2	0	0	0	0	874.814	0	1070.24	36744	0	0	0	0
272	Ningbo-Shenzhen	78125.2	65817.9	12307.4	0	0	0	0	0	0	0	0	27021.7	0	0	28532.8	0	0	22570.7	0	0	0	0	0	0	0	0	0	0	0	0	0	0	0	0	0
273	Nanjing-Sanya	99401.4	85590.6	13810.8	7781.43	0	0	0	0	0	0	8982.13	0	0	13491.6	16870.2	7539.78	16815.3	0	4076.29	8946.06	0	0	0	0	0	0	0	0	0	0	0	0	0	0	14898.7
274	Chongqing-Taiyuan	64853.1	50750.6	14102.5	0	0	0	0	5191.7	0	24096.6	0	0	0	0	0	0	0	0	0	0	12528.1	10391.4	0	0	0	0	0	0	0	0	12645.3	0	0	0	0
275	Haikou-Xi'an	95338.5	78113.6	17224.9	1372.4	0	0	0	0	0	0	0	0	0	0	9751.78	22400.4	0	0	1108.35	1761.45	8700.2	9093.84	0	0	0	17996	0	0	0	0	16079.9	0	0	0	7074.1
276	Zhengzhou-Wenzhou	58277.7	47092.8	11184.9	0	0	0	0	17114.1	0	0	0	16043.6	0	15134	0	0	9985.95	0	0	0	0	0	0	0	0	0	0	0	0	0	0	0	0	0	0
277	Chongqing-Qingdao	78289.1	65125.2	13163.9	103.796	0	0	0	15199	20703.2	0	1859.32	0	0	2960.88	0	0	0	0	4009.03	0	7188.7	15396.6	0	0	0	0	0	0	0	0	10868.6	0	0	0	0
278	Chongqing-Wenzhou	86516.1	74482.2	12033.9	0	0	0	0	0	0	0	1456.79	15908.6	0	0	0	0	21838.5	356.466	4998.32	25029.3	0	16928.1	0	0	0	0	0	0	0	0	0	0	0	0	0
279	Guangzhou-Guiyang	55252.1	43951.4	11300.8	0	0	0	0	0	0	0	0	0	0	0	14213.8	18674.3	0	0	0	0	0	0	0	0	0	22364	0	0	0	0	0	0	0	0	0
280	Jinan-Xiamen	109885	91925.1	17959.7	0	0	0	0	0	26754.2	0	3959.35	0	0	32482.4	0	0	12534.6	34154.2	0	0	0	0	0	0	0	0	0	0	0	0	0	0	0	0	0
281	Dalian-Qingdao	43995.7	26329.6	17666.1	6648.59	0	0	0	0	22990.7	0	0	0	0	0	0	0	0	0	0	0	0	0	0	0	0	0	0	0	0	0	0	0	0	14356.4	0
282	Harbin-Shenzhen	136495	120875	15619.6	15177.9	2305.02	0	8939.93	10296	4089.44	1725.87	4643.54	5692.75	456.897	2382.69	15993.4	0	5889.93	5565.71	4987.57	11358.7	0	0	10189	0	0	0	0	0	0	0	0	8608.66	10555.6	7636.01	0
283	Kunming-Puer	59528.1	20255.4	39272.6	0	0	0	0	0	0	0	0	0	0	0	0	0	0	0	0	0	0	0	0	0	0	0	59528.1	0	0	0	0	0	0	0	0
284	Guangzhou-Shijiangzhuang	85326.4	76630.3	8696.08	0	0	0	16869.9	17878.2	0	2869.09	0	0	0	0	13299	2158.23	0	0	11502.8	16595.3	0	730.264	0	0	0	2330.24	0	0	0	0	1093.32	0	0	0	0
285	Zhengzhou-Quanzhou	52684.5	43983.7	8700.83	0	0	0	0	15179.7	0	0	0	0	0	12195.5	0	0	9089.96	16219.4	0	0	0	0	0	0	0	0	0	0	0	0	0	0	0	0	0
286	Fuzhou-Nanjing	61419.6	47762.5	13657.1	0	0	0	0	0	0	0	14955.2	27282.8	0	0	0	0	0	19181.6	0	0	0	0	0	0	0	0	0	0	0	0	0	0	0	0	0
287	Wenzhou-Xi'an	94415.4	78729.2	15686.2	0	0	0	0	18249.7	0	0	0	20745.6	0	18959.8	0	0	8100.31	0	5468.49	0	0	0	0	0	0	0	0	0	0	0	22891.6	0	0	0	0
288	Ningbo-Qingdao	56176.9	43354.4	12822.5	30854.9	0	0	0	0	8594.03	0	0	13501.5	3226.49	0	0	0	0	0	0	0	0	0	0	0	0	0	0	0	0	0	0	0	0	0	0
289	Guangzhou-Lanzhou	74328.9	65083.3	9245.58	0	0	0	0	0	0	0	0	0	0	0	12784.8	10558	0	0	0	0	15350	0	0	0	0	11093.6	0	24542.4	0	0	0	0	0	0	0
290	Hohhot-Tongliao	63917.7	49937.4	13980.3	0	0	0	19901.7	0	0	0	0	0	0	0	0	0	0	0	0	0	0	0	44016.1	0	0	0	0	0	0	0	0	0	0	0	0
291	Changsha-Ningbo	44379.1	36451	7928.11	0	0	0	0	0	0	0	0	16115.9	0	3776.85	0	0	14756.1	0	0	9730.34	0	0	0	0	0	0	0	0	0	0	0	0	0	0	0
292	Wenzhou-Wuhan	46118.7	33887.2	12231.5	0	0	0	0	0	0	0	0	16842.2	0	1897.68	0	0	12768.7	1988.05	12622.1	0	0	0	0	0	0	0	0	0	0	0	0	0	0	0	0
293	Guangzhou-Yiwu	48417.5	38868.3	9549.21	0	0	0	0	0	0	0	0	14149.3	0	0	16431.6	0	2176.91	15659.7	0	0	0	0	0	0	0	0	0	0	0	0	0	0	0	0	0
294	Chengdu-Shijiangzhuang	57719.1	46324.9	11394.2	0	0	0	10054.6	0	0	11846.3	0	0	0	0	0	0	0	0	0	0	16547.1	0	2340.12	0	0	0	0	0	0	0	16930.9	0	0	0	0
295	Nanchang-Shanghai	49464.2	32038.9	17425.3	0	0	0	0	0	0	0	0	17691.1	11011.1	0	0	0	20762.1	0	0	0	0	0	0	0	0	0	0	0	0	0	0	0	0	0	0
296	Tianjin-Wuhan	49005.9	39505.3	9500.62	0	0	6331.25	17321	16411.9	0	0	0	0	0	0	0	0	0	0	8941.82	0	0	0	0	0	0	0	0	0	0	0	0	0	0	0	0
297	Sanya-Jinan	95394.9	86124	9270.95	194.2	0	0	0	0	18083	0	7160.76	0	0	20298.7	16965.8	0	22633.8	0	0	0	0	0	0	0	0	0	0	0	0	0	0	0	0	0	10058.7
298	Chengdu-Xining	62702.1	51608.8	11093.4	0	0	0	0	0	0	0	0	0	0	0	0	0	0	0	0	0	25079	0	0	0	0	0	0	23889.7	13733.4	0	0	0	0	0	0
299	Qingdao-Xiamen	96943.9	82352.9	14591	41355.2	0	0	0	0	10904.9	0	0	13617.4	0	0	0	0	0	31066.4	0	0	0	0	0	0	0	0	0	0	0	0	0	0	0	0	0
300	Yinchuan-Shanghai	87630.2	73195.6	14434.5	0	0	0	0	17040	0	2680.07	11736.3	0	10270.5	14211.3	0	0	0	0	0	0	0	0	1065.29	0	0	0	0	10644.2	0	10840.2	9142.38	0	0	0	0
301	Ordos-Beijing	39309.8	29738.1	9571.73	0	9263.58	0	5798.93	0	0	3653.54	0	0	0	0	0	0	0	0	0	0	0	0	20593.8	0	0	0	0	0	0	0	0	0	0	0	0
302	Kunming-Shijiangzhuang	78183.3	67448.7	10734.6	0	0	0	15440.6	0	0	13240.3	0	0	0	0	0	0	0	0	0	0	17826.6	0	0	0	0	766.239	15797.1	0	0	0	15112.5	0	0	0	0
303	Zhengzhou-Ningbo	50110.4	35238.8	14871.6	0	0	0	0	17106.5	0	0	8417.41	10743.6	3390.9	10452	0	0	0	0	0	0	0	0	0	0	0	0	0	0	0	0	0	0	0	0	0
304	Chongqing-Nanchang	47173.8	38332.1	8841.64	0	0	0	0	0	0	0	0	0	0	0	0	0	13134.5	0	1734.83	18798.6	0	13505.9	0	0	0	0	0	0	0	0	0	0	0	0	0
305	Chongqing-Ningbo	66052.2	52335.4	13716.8	0	0	0	0	0	0	0	0	14218.7	0	2685.78	0	0	14873.8	0	3646.04	18012.2	0	12615.7	0	0	0	0	0	0	0	0	0	0	0	0	0
306	Changchun-Jinan	64257.6	49598.2	14659.4	14502.3	0	0	0	0	20036.7	0	0	0	0	0	0	0	0	0	0	0	0	0	0	0	0	0	0	0	0	0	0	0	13761.1	15957.5	0
307	Chongqing-Shijiangzhuang	50734.6	42156.1	8578.45	0	0	0	7982.07	2982.43	0	15153.4	0	0	0	0	0	0	0	0	0	0	7228.2	7673.78	0	0	0	0	0	0	0	0	9714.67	0	0	0	0
308	Zhengzhou-Hohhot	39204.9	31216.4	7988.41	0	0	0	0	9366.13	0	20764.6	0	0	0	0	0	0	0	0	0	0	0	0	9074.18	0	0	0	0	0	0	0	0	0	0	0	0
309	Chengdu-Lijiang	39191.6	28610.1	10581.5	0	0	0	0	0	0	0	0	0	0	0	0	0	0	0	0	0	28401	0	0	0	0	0	10790.6	0	0	0	0	0	0	0	0
310	Changchun-Tianjin	56926.6	46372.7	10553.9	2749.86	0	8380.97	7924.61	0	0	0	0	0	0	0	0	0	0	0	0	0	0	0	0	0	0	0	0	0	0	0	0	0	14430.7	23440.5	0
311	Guangzhou-Dalian	99174.5	86775.8	12398.7	18109.4	0	0	0	0	10672.7	0	8284.4	14860.2	328.819	3369.71	16169	0	4943.05	14750.2	0	0	0	0	0	0	0	0	0	0	0	0	0	0	0	7687.02	0
312	Zhengzhou-Qingdao	44753.3	32854.4	11898.8	0	0	0	0	15087.5	29665.8	0	0	0	0	0	0	0	0	0	0	0	0	0	0	0	0	0	0	0	0	0	0	0	0	0	0
313	Chengdu-Fuzhou	67057.5	54720.1	12337.4	0	0	0	0	0	0	0	0	0	0	0	0	0	11080.2	14852.3	649.189	16311.7	10981.5	8142.56	0	0	0	5040.02	0	0	0	0	0	0	0	0	0
314	Harbin-Xi'an	94488.8	77377.5	17111.3	1892.95	0	2076.87	10436.5	1562.07	2584.19	3488.47	0	0	0	0	0	0	0	0	0	0	0	0	19281	0	0	0	0	0	0	0	21147.7	15968.6	9816.07	6234.3	0
315	Guiyang-Sanya	43317.7	36109.3	7208.45	9826.4	0	0	0	0	0	0	0	0	0	0	1773.96	14959.9	0	0	0	0	0	0	0	0	0	8177.69	0	0	0	0	0	0	0	0	8579.81
316	Guilin-Beijing	77055.8	67197.8	9857.94	0	10254.1	0	13210.6	12904.8	0	2801	0	0	0	0	0	7963.26	0	0	9233.8	15604.9	0	913.522	0	0	0	0	0	0	0	0	4169.76	0	0	0	0
317	Fuzhou-Changsha	42578.8	31416.7	11162.1	0	0	0	0	0	0	0	0	0	0	0	0	0	16587.8	15200.6	0	10790.4	0	0	0	0	0	0	0	0	0	0	0	0	0	0	0
318	Nanjing-Qingdao	41640.8	28247.2	13393.6	885.283	0	0	0	0	15227.2	0	20538.9	0	0	4989.31	0	0	0	0	0	0	0	0	0	0	0	0	0	0	0	0	0	0	0	0	0
319	Fuzhou-Tianjin	113418	100064	13353.4	15024.1	0	8521.74	11503.3	0	15801.1	0	11917.5	6907.03	409.047	16333	0	0	8488.97	18511.8	0	0	0	0	0	0	0	0	0	0	0	0	0	0	0	0	0
320	Shenzhen-Taiyuan	71123.9	61137.4	9986.45	0	0	0	0	17050.2	0	12031.6	0	0	0	0	13763.5	0	6539.44	0	8910.76	12828.5	0	0	0	0	0	0	0	0	0	0	0	0	0	0	0
321	Nanchang-Zhuhai	39260	30433.9	8826.05	0	0	0	0	0	0	0	0	0	0	0	16793.5	0	22466.4	0	0	0	0	0	0	0	0	0	0	0	0	0	0	0	0	0	0
322	Dalian-Shenzhen	96978.1	85362.5	11615.6	23914	0	0	0	0	10035.5	0	4402.15	9802.39	176.519	3707.46	17881	0	4911.32	14922.7	0	0	0	0	0	0	0	0	0	0	0	0	0	0	0	7225.07	0
323	Changsha-Taiyuan	49362.3	40433	8929.24	0	0	0	0	14430.5	0	14438.6	0	0	0	0	0	0	0	0	10042.8	10450.4	0	0	0	0	0	0	0	0	0	0	0	0	0	0	0
324	Quanzhou-Kunming	66263.4	54736	11527.4	0	0	0	0	0	0	0	0	0	0	0	14589.2	8433.95	0	13943	0	0	0	0	0	0	0	10777.5	18519.9	0	0	0	0	0	0	0	0
325	Hefei-Beijing	56969.5	42865	14104.4	0	10055.9	0	10562.1	0	13909.9	0	2552.24	0	0	19889.4	0	0	0	0	0	0	0	0	0	0	0	0	0	0	0	0	0	0	0	0	0
326	Shijiangzhuang-Shenzhen	64216.3	54871.7	9344.63	0	0	0	13012.9	15387.6	0	0	0	0	0	0	13647.4	0	0	0	8387.05	13781.4	0	0	0	0	0	0	0	0	0	0	0	0	0	0	0
327	Changchun-Hangzhou	101192	88074.8	13117.2	33469.7	0	2426.54	1998.45	0	15877.6	0	2602.66	11672.5	0	294.738	0	0	0	0	0	0	0	0	0	0	0	0	0	0	0	0	0	0	13463.9	19385.9	0
328	Enshi-Wuhan	38463.4	24816.4	13647.1	0	0	0	0	0	0	0	0	0	0	0	0	0	0	0	38463.4	0	0	0	0	0	0	0	0	0	0	0	0	0	0	0	0
329	Beijing-Taiyuan	52488.5	27197	25291.6	0	22315.8	0	11743.7	0	0	18429	0	0	0	0	0	0	0	0	0	0	0	0	0	0	0	0	0	0	0	0	0	0	0	0	0
330	Chongqing-Quanzhou	55582.4	46680.9	8901.48	0	0	0	0	0	0	0	0	0	0	0	9823.47	6773.23	2148.28	10012.3	7806.74	0	0	9133.12	0	0	0	9885.25	0	0	0	0	0	0	0	0	0
331	Chengdu-Yinchuan	70520.8	56352.3	14168.5	0	0	0	0	0	0	0	0	0	0	0	0	0	0	0	0	0	24467.5	0	6093.27	0	0	0	0	23106.9	1016.79	15836.4	0	0	0	0	0
332	Chengdu-Nanchang	54137.3	43776.5	10360.8	0	0	0	0	0	0	0	0	0	0	0	0	0	16894.2	0	1676.92	13129.4	16262.2	6174.61	0	0	0	0	0	0	0	0	0	0	0	0	0
333	Zhengzhou-Yinchuan	47939.2	38808.5	9130.73	0	0	0	0	8948.15	0	16106.9	0	0	0	0	0	0	0	0	0	0	0	0	8732.93	0	0	0	0	0	0	7479.06	6672.12	0	0	0	0
334	Nanning-Xiamen	38775.1	29096.9	9678.18	0	0	0	0	0	0	0	0	0	0	0	17455.3	12978.7	0	8341.12	0	0	0	0	0	0	0	0	0	0	0	0	0	0	0	0	0
335	Fuzhou-Kunming	76351.2	62352	13999.2	376.713	0	0	0	0	0	0	0	0	0	0	8883.74	9777.87	8142.54	15756.8	0	7844.39	0	0	0	0	0	7708.68	17860.4	0	0	0	0	0	0	0	0
336	Hefei-Xi'an	55239.3	42511.2	12728.1	0	0	0	0	22476.7	0	0	0	0	0	13534.8	0	0	0	0	2252.97	0	0	0	0	0	0	0	0	0	0	0	16974.8	0	0	0	0
337	Guangzhou-Hohhot	67168	58268.3	8899.75	0	0	0	0	8953.14	0	13723.9	0	0	0	0	11671.8	0	0	0	9154.84	13222.4	0	0	10442	0	0	0	0	0	0	0	0	0	0	0	0
338	Nanning-Jinan	99733.7	87653.8	12079.8	0	0	0	722.165	17545.1	15036.3	0	392.567	0	0	3520.95	2940.07	23134.6	5177.91	0	12002.5	19261.5	0	0	0	0	0	0	0	0	0	0	0	0	0	0	0
339	Wuhan-Zhuhai	37642.1	31445	6197.13	0	0	0	0	0	0	0	0	0	0	0	13779.8	0	0	0	8735.46	15126.8	0	0	0	0	0	0	0	0	0	0	0	0	0	0	0
340	Nanchang-Qingdao	71455.7	57927.2	13528.5	15507.3	0	0	0	0	12060.7	0	12068.5	0	0	17347.4	0	0	14471.8	0	0	0	0	0	0	0	0	0	0	0	0	0	0	0	0	0	0
341	Shijiangzhuang-Xiamen	67141.8	57865.3	9276.57	0	0	0	12672.5	0	12523.6	0	3651.54	2322.95	0	12683.5	0	0	6658.57	16629.2	0	0	0	0	0	0	0	0	0	0	0	0	0	0	0	0	0
342	Guangzhou-Nanchang	40282.3	27315.8	12966.5	0	0	0	0	0	0	0	0	0	0	0	18309.2	0	21973.2	0	0	0	0	0	0	0	0	0	0	0	0	0	0	0	0	0	0
343	Guilin-Nanjing	50177.9	40665	9512.91	0	0	0	0	0	0	0	7987.14	0	0	9637.46	0	9897.57	0	0	8682.24	13973.5	0	0	0	0	0	0	0	0	0	0	0	0	0	0	0
344	Zhengzhou-Xining	50897	40124.8	10772.2	0	0	0	0	12541.5	0	0	0	0	0	0	0	0	0	0	0	0	0	0	0	0	0	0	0	14546.6	8628.51	4889.41	10291	0	0	0	0
345	Wuhan-Xi'an	57162.9	36678.5	20484.4	0	0	0	0	11128.3	0	0	0	0	0	0	0	0	0	0	24798.8	0	0	0	0	0	0	0	0	0	0	0	21235.8	0	0	0	0
346	Nanjing-Lanzhou	73493	60619.5	12873.5	0	0	0	0	17570.1	0	0	14235.9	0	0	11922.3	0	0	0	0	0	0	0	0	0	0	0	0	0	15188.8	0	4471.33	10104.5	0	0	0	0
347	Changsha-Urumqi	129020	119306	9714.24	0	0	0	0	0	0	0	0	0	0	0	0	0	0	0	9512.25	18171.7	0	4537.02	1570.59	25896.9	0	0	0	31444.9	20774.6	3970.7	13141.5	0	0	0	0
348	Hefei-Zhuhai	48658.7	41446.6	7212.05	0	0	0	0	0	0	0	0	0	0	10512.6	14554.5	0	23591.6	0	0	0	0	0	0	0	0	0	0	0	0	0	0	0	0	0	0
349	Kunming-Wuxi	91562.8	77741	13821.8	0	0	0	0	0	0	0	11262.7	0	0	12044.5	0	0	0	0	19291.5	7596.18	2815.47	8798.63	0	0	0	11376	18377.8	0	0	0	0	0	0	0	0
350	Changsha-Lanzhou	64890.3	53318.2	11572.1	0	0	0	0	0	0	0	0	0	0	0	0	0	0	0	12068	15672.3	0	3373.94	0	0	0	0	0	16745.1	0	3605.74	13425.3	0	0	0	0
351	Guangzhou-Lijiang	51730	41653.5	10076.5	0	0	0	0	0	0	0	0	0	0	0	16137.1	15123	0	0	0	0	0	0	0	0	0	0	20469.9	0	0	0	0	0	0	0	0
352	Hohhot-Changsha	54433	46021.3	8411.65	0	0	0	1138.56	13520.9	2547.6	13508.5	0	0	0	0	0	0	0	0	8036.9	7970.47	0	0	7710.07	0	0	0	0	0	0	0	0	0	0	0	0
353	Guilin-Xiamen	38446	30674.3	7771.71	0	0	0	0	0	0	0	0	0	0	0	17548.1	12120.2	0	8777.73	0	0	0	0	0	0	0	0	0	0	0	0	0	0	0	0	0
354	Haikou-Guilin	49066.5	39157.3	9909.2	9224.41	0	0	0	0	0	0	0	0	0	0	5941.97	26428.2	0	0	0	0	0	0	0	0	0	0	0	0	0	0	0	0	0	0	7471.94
355	Xi'an-Yantai	51334	39609.3	11724.7	0	0	0	0	14129.2	21898.4	0	0	0	0	0	0	0	0	0	0	0	0	0	0	0	0	0	0	0	0	0	15306.3	0	0	0	0
356	Guiyang-Tianjin	74235.2	63054	11181.2	0	0	6745.74	9994.23	3729.55	0	10477.9	0	0	0	0	0	0	0	0	6128.76	3244.07	3842.21	4939.46	0	0	0	14512.4	0	0	0	0	10620.9	0	0	0	0
357	Xingyi-Guiyang	23384.4	14553.1	8831.32	0	0	0	0	0	0	0	0	0	0	0	0	0	0	0	0	0	0	0	0	0	0	23384.4	0	0	0	0	0	0	0	0	0
358	Kunming-Lanzhou	71053.4	59700.9	11352.5	0	0	0	0	0	0	0	0	0	0	0	0	0	0	0	0	0	23412.9	2406.49	0	0	0	635.805	16229.9	28368.3	0	0	0	0	0	0	0
359	Haikou-Xiamen	40254.6	34122.7	6131.85	4792.69	0	0	0	0	0	0	0	0	0	0	20970	0	0	9152.18	0	0	0	0	0	0	0	0	0	0	0	0	0	0	0	0	5339.74
360	Zhangjiajie-Shanghai	50210.8	41279.6	8931.23	0	0	0	0	0	0	0	9047.67	0	8962.25	10688.6	0	0	0	0	8990.25	12522.1	0	0	0	0	0	0	0	0	0	0	0	0	0	0	0
361	Hangzhou-Jieyang	41882.2	32736.2	9146.03	0	0	0	0	0	0	0	0	16632.6	0	0	9634.81	0	0	15614.8	0	0	0	0	0	0	0	0	0	0	0	0	0	0	0	0	0
362	Dalian-Wuhan	57957.3	47132.3	10824.9	5449.16	0	0	3299.35	17101.3	16507.1	0	0	0	0	0	0	0	0	0	8786.49	0	0	0	0	0	0	0	0	0	0	0	0	0	0	6813.79	0
363	Hangzhou-Changsha	46264.4	37797	8467.4	0	0	0	0	0	0	0	0	17239.6	0	0	0	0	18044	0	0	10980.8	0	0	0	0	0	0	0	0	0	0	0	0	0	0	0
364	Chengdu-Zhuhai	46571.6	38412.5	8159.13	0	0	0	0	0	0	0	0	0	0	0	10328.3	9756.8	0	0	0	0	14244.4	654.015	0	0	0	11588.1	0	0	0	0	0	0	0	0	0
365	Dali-Kunming	36941.7	15067.2	21874.5	0	0	0	0	0	0	0	0	0	0	0	0	0	0	0	0	0	0	0	0	0	0	0	36941.7	0	0	0	0	0	0	0	0
366	Changsha-Jieyang	44824.8	34160.6	10664.2	0	0	0	0	0	0	0	0	0	0	0	20825	0	4124.17	0	0	19875.6	0	0	0	0	0	0	0	0	0	0	0	0	0	0	0
367	Changchun-Shijiangzhuang	47383.7	39923.3	7460.43	0	2665.15	0	15477	0	0	0	0	0	0	0	0	0	0	0	0	0	0	0	18271.2	0	0	0	0	0	0	0	0	0	8596.54	2373.82	0
368	Kunming-Sanya	42840.8	33251.4	9589.39	8111.37	0	0	0	0	0	0	0	0	0	0	0	9482	0	0	0	0	0	0	0	0	0	0	14380.9	0	0	0	0	0	0	0	10866.6
369	Fuzhou-Nanning	48338.9	41517.8	6821.01	0	0	0	0	0	0	0	0	0	0	0	19743.1	14347.8	0	14247.9	0	0	0	0	0	0	0	0	0	0	0	0	0	0	0	0	0
370	Nanchang-Taiyuan	49955.8	39185.1	10770.7	0	0	0	0	18191	0	14123.5	0	0	0	0	0	0	10395.4	0	7245.9	0	0	0	0	0	0	0	0	0	0	0	0	0	0	0	0
371	Wuhan-Lanzhou	64091.1	37628.5	26462.6	0	0	0	0	8352.06	0	0	0	0	0	0	0	0	0	0	22017.2	0	0	0	0	0	0	0	0	20960.6	0	3010.28	9750.96	0	0	0	0
372	Beijing-Weihai	28119.5	20806.3	7313.27	4518.3	5834.64	2025.45	5044.14	0	10697	0	0	0	0	0	0	0	0	0	0	0	0	0	0	0	0	0	0	0	0	0	0	0	0	0	0
373	Chongqing-Yinchuan	41702.1	32985.1	8716.98	0	0	0	0	0	0	0	0	0	0	0	0	0	0	0	0	0	7526.82	6892.72	0	0	0	0	0	5498.57	0	10244.9	11539.1	0	0	0	0
374	Ningbo-Xi'an	51794.8	42232.9	9561.9	0	0	0	0	14544.3	0	0	5349.81	10927.3	2008.91	8470.56	0	0	2378.99	0	0	0	0	0	0	0	0	0	0	0	0	0	8114.96	0	0	0	0
375	Guiyang-Jinan	60775.6	48749.1	12026.5	0	0	0	1145.1	10965.7	10953.8	331.562	465.199	0	0	1808.96	0	0	2042.71	0	7731.47	6694.81	927.416	1745.02	0	0	0	12444.9	0	0	0	0	3518.87	0	0	0	0
376	Hailar-Beijing	39016.7	33770.4	5246.29	0	5807.29	0	6800.38	0	0	0	0	0	0	0	0	0	0	0	0	0	0	0	26409	0	0	0	0	0	0	0	0	0	0	0	0
377	Hohhot-Xilinhot	34167.2	24781.3	9385.96	0	0	0	0	0	0	0	0	0	0	0	0	0	0	0	0	0	0	0	34167.2	0	0	0	0	0	0	0	0	0	0	0	0
378	Lijiang-Xi'an	49372.6	40810.5	8562.14	0	0	0	0	0	0	0	0	0	0	0	0	0	0	0	0	0	24342	846.646	0	0	0	2778.21	7542.18	0	0	0	13863.6	0	0	0	0
379	Shijiangzhuang-Sanya	64269.2	56458.2	7811.04	1668.18	0	0	8584.13	11010.6	0	1601.17	0	0	0	0	1052.77	14303.2	0	0	8176.41	10772.5	0	0	0	0	0	0	0	0	0	0	0	0	0	0	7100.28
380	Zhengzhou-Lanzhou	51381.8	37117.7	14264	0	0	0	0	19050.3	0	0	0	0	0	0	0	0	0	0	0	0	0	0	0	0	0	0	0	15142.8	0	3951.01	13237.7	0	0	0	0
381	Guangzhou-Yichang	40356.1	29176.4	11179.7	0	0	0	0	0	0	0	0	0	0	0	12919.7	0	0	0	9448.28	17988.2	0	0	0	0	0	0	0	0	0	0	0	0	0	0	0
382	Nanjing-Zhuhai	65918.3	53528.2	12390.1	0	0	0	0	0	0	0	16755.1	0	0	9693.31	17372.2	0	22097.7	0	0	0	0	0	0	0	0	0	0	0	0	0	0	0	0	0	0
383	Hangzhou-Yantai	54217.5	36412.5	17805	22886.8	0	0	0	0	17846.4	0	0	13484.2	0	0	0	0	0	0	0	0	0	0	0	0	0	0	0	0	0	0	0	0	0	0	0
384	Chongqing-Wuxi	42867.8	36574.6	6293.23	0	0	0	0	0	0	0	6974.31	0	0	7562.3	0	0	0	0	19061.4	0	0	9269.87	0	0	0	0	0	0	0	0	0	0	0	0	0
385	Shenyang-Xiamen	79744	70337.6	9406.36	25193.2	0	0	1580.87	2149.46	10143.6	0	3784.9	3973.47	0	2081.72	0	0	1922.17	15087.4	1516.69	0	0	0	0	0	0	0	0	0	0	0	0	0	0	12310.5	0
386	Quanzhou-Wuhan	36374.2	28933.9	7440.27	0	0	0	0	0	0	0	0	0	0	0	0	0	9679.4	14758.8	11936	0	0	0	0	0	0	0	0	0	0	0	0	0	0	0	0
387	Dalian-Hefei	39410.7	34205.4	5205.34	3914.8	0	0	0	0	11482.5	0	10994.8	0	0	8026.43	0	0	0	0	0	0	0	0	0	0	0	0	0	0	0	0	0	0	0	4992.14	0
388	Nanchang-Guiyang	34869.6	28396.7	6472.91	0	0	0	0	0	0	0	0	0	0	0	0	0	7976.38	0	0	16358.7	0	0	0	0	0	10534.5	0	0	0	0	0	0	0	0	0
389	Jiamusi-Beijing	38061.9	33683.9	4378.01	0	4572.23	0	4022.76	0	0	0	0	0	0	0	0	0	0	0	0	0	0	0	9791.28	0	0	0	0	0	0	0	0	10645	7055.52	1975.16	0
390	Shanghai-Zunyi	64176.7	53415.5	10761.3	0	0	0	0	0	0	0	10916.8	0	9016.23	11544.4	0	0	0	0	11891.6	10686.4	0	0	0	0	0	10121.3	0	0	0	0	0	0	0	0	0
391	Guiyang-Wuhan	46074.6	35242.1	10832.5	0	0	0	0	0	0	0	0	0	0	0	0	0	0	0	13966.6	11372.7	0	0	0	0	0	20735.3	0	0	0	0	0	0	0	0	0
392	Zhoushan-Quanzhou	30826.9	24131.3	6695.59	0	0	0	0	0	0	0	0	16470.1	0	0	0	0	0	14356.8	0	0	0	0	0	0	0	0	0	0	0	0	0	0	0	0	0
393	Haikou-Taiyuan	68610.8	58219.7	10391.1	454.41	0	0	0	8960.32	0	12346.8	0	0	0	3656.51	6758.69	11398.9	3337.04	0	5705.13	11108.9	0	602.757	0	0	0	0	0	0	0	0	564.554	0	0	0	3716.75
394	Beihai-Shanghai	47562.3	39867.2	7695.13	0	0	0	0	0	0	0	0	9159.91	7399.8	0	10790.4	8428.71	0	11783.5	0	0	0	0	0	0	0	0	0	0	0	0	0	0	0	0	0
395	Mianyang-Shanghai	49712.1	42016.9	7695.13	0	0	0	0	0	0	0	6108.6	0	6899.54	8212.93	0	0	0	0	12628.3	0	12058.2	3804.52	0	0	0	0	0	0	0	0	0	0	0	0	0
396	Nanchang-Tianjin	45267.6	39133.4	6134.2	0	0	5278	4787.42	0	12225.6	0	4210.41	5198.75	0	7263.97	0	0	6303.46	0	0	0	0	0	0	0	0	0	0	0	0	0	0	0	0	0	0
397	Haikou-Zhuhai	20482.1	17847.3	2634.88	7286.34	0	0	0	0	0	0	0	0	0	0	8549.46	0	0	0	0	0	0	0	0	0	0	0	0	0	0	0	0	0	0	0	4646.34
398	Fuzhou-Qingdao	47495.1	39446.9	8048.25	27698.6	0	0	0	0	6613.47	0	0	2843.84	0	0	0	0	0	10339.2	0	0	0	0	0	0	0	0	0	0	0	0	0	0	0	0	0
399	Shanghai Pudong-Jinan	18825.8	11832.1	6993.71	0	0	0	0	0	7942.56	0	6155.84	0	4727.39	0	0	0	0	0	0	0	0	0	0	0	0	0	0	0	0	0	0	0	0	0	0
400	Shanghai Hongqiao-Jinan	18635.8	13343	5292.75	0	0	0	0	0	7529.43	0	6737.3	0	4369.07	0	0	0	0	0	0	0	0	0	0	0	0	0	0	0	0	0	0	0	0	0	0
401	Wuxi-Xiamen	32673.2	23777.1	8896.17	0	0	0	0	0	0	0	8392.18	10600.5	0	0	0	0	0	13680.6	0	0	0	0	0	0	0	0	0	0	0	0	0	0	0	0	0
402	Daqing-Beijing	35197.2	28444.9	6752.34	0	6349.95	0	3180.65	0	0	0	0	0	0	0	0	0	0	0	0	0	0	0	12058	0	0	0	0	0	0	0	0	8297.13	5311.43	0	0
403	Jinan-Urumqi	111317	100100	11216.4	0	0	0	3145.38	9958.24	12131	6777.8	0	0	0	0	0	0	0	0	0	0	0	0	4378.15	27315	0	0	0	22932.1	11787.4	4031.93	8859.68	0	0	0	0
404	Shenyang-Taiyuan	48087.2	39491.4	8595.79	0	4084.03	0	15213.1	0	0	8968.74	0	0	0	0	0	0	0	0	0	0	0	0	0	0	0	0	0	0	0	0	0	0	0	19821.3	0
405	Hohhot-Tianjin	28133.3	21437.3	6696.01	0	3075.48	8139.87	6420.68	0	0	0	0	0	0	0	0	0	0	0	0	0	0	0	10497.3	0	0	0	0	0	0	0	0	0	0	0	0
406	Shenyang-Wuxi	41369.6	32219.3	9150.35	9012.02	0	0	0	0	7588.63	0	12773.4	0	0	0	0	0	0	0	0	0	0	0	0	0	0	0	0	0	0	0	0	0	0	11995.5	0
407	Nanchang-Jinan	53451.9	46948	6503.96	0	0	0	0	0	11772.2	0	4109.62	0	0	19110.2	0	0	18459.9	0	0	0	0	0	0	0	0	0	0	0	0	0	0	0	0	0	0
408	Diqing-Kunming	46825.6	21954.9	24870.7	0	0	0	0	0	0	0	0	0	0	0	0	0	0	0	0	0	0	0	0	0	0	0	46825.6	0	0	0	0	0	0	0	0
409	Haikou-Ningbo	53742.6	47629.3	6113.35	7162.03	0	0	0	0	0	0	0	13455.7	0	0	14406.4	0	0	12812.9	0	0	0	0	0	0	0	0	3056.67	0	0	0	0	0	0	0	2848.94
410	Tianjin-Urumqi	89593.5	80817.7	8775.71	0	2776.23	6703.88	6652.79	0	0	4878.67	0	0	0	0	0	0	0	0	0	0	0	0	32318.3	24097.9	0	0	0	7418.76	3776.3	322.261	648.308	0	0	0	0
411	Shanghai-Zhanjiang	54190.3	40477.1	13713.2	0	0	0	0	0	0	0	0	9408.42	7060.18	0	21874.1	0	6795.29	9052.36	0	0	0	0	0	0	0	0	0	0	0	0	0	0	0	0	0
412	Dalian-Shijiangzhuang	37789.5	28095.3	9694.21	9610.02	0	5006.72	14788.5	0	0	0	0	0	0	0	0	0	0	0	0	0	0	0	0	0	0	0	0	0	0	0	0	0	0	8384.23	0
413	Harbin-Shijiangzhuang	44958.3	39567.8	5390.57	0	2508.12	0	16022.4	0	0	0	0	0	0	0	0	0	0	0	0	0	0	0	9708.16	0	0	0	0	0	0	0	0	7489.91	6413.55	2816.23	0

## Sheet: Table 6
No.	Routes	Overall emissions (tons)	At sea	Beijing	Tianjin	Hebei	Henan	Shandong	Shanxi	Jiangsu	Zhejiang	Shanghai	Anhui	Guangdong	Guangxi	Jiangsu	Fujian	Hubei	Hunan	Sichuan	Chongqing	Inner Mongolia	Xinjiang	Tibet	Guizhou	Yunnan	Gansu	Qinghai	Ningxia	Shaanxi	Heilongjiang	Jilin	Liaoning	Hainan
1	Beijing-Shanghai	419621	0	63819.9	25081.9	39002.9	0	111848	0	102518	0	64509.9	12841	0	0	0	0	0	0	0	0	0	0	0	0	0	0	0	0	0	0	0	0	0
2	Guangzhou-Shanghai	80563.6	0	0	0	0	0	0	0	0	18323.1	12159.6	0	20843.8	0	3779.62	25457.4	0	0	0	0	0	0	0	0	0	0	0	0	0	0	0	0	0
3	Shanghai-Shenzhen	12172.9	3011.93	0	0	0	0	0	0	0	1056.22	1417.63	0	3140.17	0	0	3546.99	0	0	0	0	0	0	0	0	0	0	0	0	0	0	0	0	0
4	Guangzhou-Beijing	423714	0	34328.9	0	57887.8	0	119364	0	0	0	0	0	73269.2	0	89947	0	48916.8	0	0	0	0	0	0	0	0	0	0	0	0	0	0	0	0
5	Chengdu-Beijing	429099	0	49073.8	0	68969.4	0	0	98102.1	0	0	0	0	0	0	0	0	0	0	102679	0	0	0	0	0	0	0	0	0	110274	0	0	0	0
6	Beijing-Shenzhen	244640	0	32252.5	0	28061.7	57543	0	0	0	0	0	0	40361.8	0	44951.2	0	20671.9	20798.3	0	0	0	0	0	0	0	0	0	0	0	0	0	0	0
7	Chengdu-Shanghai	198218	0	0	0	0	0	0	0	21112.1	0	28419.7	29562.6	0	0	0	0	48100.8	0	51131.1	19891.4	0	0	0	0	0	0	0	0	0	0	0	0	0
8	Chongqing-Shanghai	53736.9	0	0	0	0	0	0	0	4150.43	0	7994.16	10794.7	0	0	0	0	21269.5	0	0	9528.14	0	0	0	0	0	0	0	0	0	0	0	0	0
9	Guangzhou-Chengdu	101687	0	0	0	0	0	0	0	0	0	0	0	28308.2	22787.8	0	0	0	0	28989.4	0	0	0	0	21602.1	0	0	0	0	0	0	0	0	0
10	Chengdu-Shenzhen	92895.1	0	0	0	0	0	0	0	0	0	0	0	28138.8	20844.1	0	0	0	0	25447.8	0	0	0	0	18464.4	0	0	0	0	0	0	0	0	0
11	Hangzhou-Beijing	256213	0	40856.5	7730.13	28314.5	0	65714.9	0	71384.8	42212.3	0	0	0	0	0	0	0	0	0	0	0	0	0	0	0	0	0	0	0	0	0	0	0
12	Guangzhou-Hangzhou	40266.3	0	0	0	0	0	0	0	0	12620.7	0	0	9059.73	0	16416.4	2169.43	0	0	0	0	0	0	0	0	0	0	0	0	0	0	0	0	0
13	Shanghai-Xi'an	11480.3	0	0	0	0	2993.33	0	0	1897.89	0	2074.43	2470.26	0	0	0	0	0	0	0	0	0	0	0	0	0	0	0	0	2044.42	0	0	0	0
14	Chongqing-Shenzhen	44071.8	0	0	0	0	0	0	0	0	0	0	0	12817	8607.35	0	0	0	0	0	12859.3	0	0	0	9788.25	0	0	0	0	0	0	0	0	0
15	Xishuangbanna-Kunming	0	0	0	0	0	0	0	0	0	0	0	0	0	0	0	0	0	0	0	0	0	0	0	0	0	0	0	0	0	0	0	0	0
16	Chongqing-Beijing	206150	0	28360.1	0	34404.6	12069.5	0	48321	0	0	0	0	0	0	0	0	0	0	13551.4	38292.8	0	0	0	0	0	0	0	0	31151	0	0	0	0
17	Beijing-Xi'an	84243.8	0	15944	0	17846.5	0	0	28970.6	0	0	0	0	0	0	0	0	0	0	0	0	0	0	0	0	0	0	0	0	21482.8	0	0	0	0
18	Guangzhou-Chongqing	47116.9	0	0	0	0	0	0	0	0	0	0	0	11252.5	8989.86	0	0	0	0	0	15609.9	0	0	0	11264.7	0	0	0	0	0	0	0	0	0
19	Shanghai-Qingdao	0	0	0	0	0	0	0	0	0	0	0	0	0	0	0	0	0	0	0	0	0	0	0	0	0	0	0	0	0	0	0	0	0
20	Shanghai-Xiamen	0	0	0	0	0	0	0	0	0	0	0	0	0	0	0	0	0	0	0	0	0	0	0	0	0	0	0	0	0	0	0	0	0
21	Kunming-Beijing	76223.5	0	8832.58	0	8930.82	0	0	12109.8	0	0	0	0	0	0	0	0	0	0	17391.9	860.897	0	0	0	586.719	16210.7	0	0	0	11300	0	0	0	0
22	Hangzhou-Shenzhen	45373.5	0	0	0	0	0	0	0	0	17742.2	0	0	11431.5	0	0	16199.8	0	0	0	0	0	0	0	0	0	0	0	0	0	0	0	0	0
23	Kunming-Shanghai	7700.53	0	0	0	0	0	0	0	178.542	297.351	930.578	849.715	0	0	998.391	0	0	1626.9	0	0	0	0	0	1741.44	1077.61	0	0	0	0	0	0	0	0
24	Beijing-Sanya	155327	4364.39	14780.2	0	26207.4	22976.3	0	8222.77	0	0	0	0	0	23893.5	0	0	15533.7	22754.9	0	0	0	0	0	0	0	0	0	0	0	0	0	0	16593.5
25	Chengdu-Kunming	25328.9	0	0	0	0	0	0	0	0	0	0	0	0	0	0	0	0	0	8875.32	0	0	0	0	3244.78	13208.8	0	0	0	0	0	0	0	0
26	Dalian-Shanghai	8052.03	4844.72	0	0	0	0	864.259	0	0	0	1192.83	0	0	0	0	0	0	0	0	0	0	0	0	0	0	0	0	0	0	0	0	1150.23	0
27	Guangzhou-Xi'an	0	0	0	0	0	0	0	0	0	0	0	0	0	0	0	0	0	0	0	0	0	0	0	0	0	0	0	0	0	0	0	0	0
28	Harbin-Beijing	70363.2	0	9678.58	0	8184.56	0	0	0	0	0	0	0	0	0	0	0	0	0	0	0	24862.6	0	0	0	0	0	0	0	0	11054.8	13442.5	3140.13	0
29	Guangzhou-Nanjing	0	0	0	0	0	0	0	0	0	0	0	0	0	0	0	0	0	0	0	0	0	0	0	0	0	0	0	0	0	0	0	0	0
30	Shanghai-Shenyang	0	0	0	0	0	0	0	0	0	0	0	0	0	0	0	0	0	0	0	0	0	0	0	0	0	0	0	0	0	0	0	0	0
31	Changsha-Beijing	72258.3	0	11529.7	0	16376.9	21198.9	0	0	0	0	0	0	0	0	0	0	10771.8	12380.9	0	0	0	0	0	0	0	0	0	0	0	0	0	0	0
32	Shanghai-Sanya	0	0	0	0	0	0	0	0	0	0	0	0	0	0	0	0	0	0	0	0	0	0	0	0	0	0	0	0	0	0	0	0	0
33	Guangzhou-Haikou	0	0	0	0	0	0	0	0	0	0	0	0	0	0	0	0	0	0	0	0	0	0	0	0	0	0	0	0	0	0	0	0	0
34	Beijing-Xiamen	81268.2	0	8940.3	4044.31	4112.38	0	13374.3	0	2710.89	0	0	19973.3	0	0	7860.38	20252.4	0	0	0	0	0	0	0	0	0	0	0	0	0	0	0	0	0
35	Nanjing-Shenzhen	0	0	0	0	0	0	0	0	0	0	0	0	0	0	0	0	0	0	0	0	0	0	0	0	0	0	0	0	0	0	0	0	0
36	Dalian-Beijing	56451.7	21112.2	11156.4	12619.6	0	0	0	0	0	0	0	0	0	0	0	0	0	0	0	0	0	0	0	0	0	0	0	0	0	0	0	11563.5	0
37	Beijing-Urumqi	111591	0	12289.2	0	6239.2	0	0	5562.82	0	0	0	0	0	0	0	0	0	0	0	0	45337.3	35629.3	0	0	0	6532.85	0	0	0	0	0	0	0
38	Harbin-Shanghai	16721	7234.11	0	0	0	0	1090.8	0	0	0	1388.67	0	0	0	0	0	0	0	0	0	0	0	0	0	0	0	0	0	0	1531.01	2501.47	2974.9	0
39	Shenzhen-Xi'an	0	0	0	0	0	0	0	0	0	0	0	0	0	0	0	0	0	0	0	0	0	0	0	0	0	0	0	0	0	0	0	0	0
40	ShanghaiPudong-Wuhan	0	0	0	0	0	0	0	0	0	0	0	0	0	0	0	0	0	0	0	0	0	0	0	0	0	0	0	0	0	0	0	0	0
41	ShanghaiHongqiao-Wuhan	0	0	0	0	0	0	0	0	0	0	0	0	0	0	0	0	0	0	0	0	0	0	0	0	0	0	0	0	0	0	0	0	0
42	Chengdu-Hangzhou	86854.1	0	0	0	0	0	0	0	0	16096.5	0	2326.37	0	0	19244.2	0	0	19304.6	20753.6	9128.84	0	0	0	0	0	0	0	0	0	0	0	0	0
43	Guangzhou-Kunming	0	0	0	0	0	0	0	0	0	0	0	0	0	0	0	0	0	0	0	0	0	0	0	0	0	0	0	0	0	0	0	0	0
44	Changchun-Shanghai	26973	14460.7	0	0	0	0	1966.24	0	0	0	2458.36	0	0	0	0	0	0	0	0	0	0	0	0	0	0	0	0	0	0	0	3312.34	4775.34	0
45	Shanghai-Tianjin	40866.3	0	0	6855.35	6698.74	0	10389.9	0	10581.9	0	6340.51	0	0	0	0	0	0	0	0	0	0	0	0	0	0	0	0	0	0	0	0	0	0
46	Changsha-Shanghai	0	0	0	0	0	0	0	0	0	0	0	0	0	0	0	0	0	0	0	0	0	0	0	0	0	0	0	0	0	0	0	0	0
47	Chongqing-Hangzhou	49200.2	0	0	0	0	0	0	0	0	11828.2	0	0	0	0	14427.1	0	0	13507.9	0	9437.06	0	0	0	0	0	0	0	0	0	0	0	0	0
48	Beijing-Wuhan	69179	0	8838.45	0	19640.2	23003.7	0	5116.59	0	0	0	0	0	0	0	0	12580.1	0	0	0	0	0	0	0	0	0	0	0	0	0	0	0	0
49	Beijing-Qingdao	38069.8	11323.3	8420.42	4970.35	1955.76	0	11400	0	0	0	0	0	0	0	0	0	0	0	0	0	0	0	0	0	0	0	0	0	0	0	0	0	0
50	Chongqing-Kunming	0	0	0	0	0	0	0	0	0	0	0	0	0	0	0	0	0	0	0	0	0	0	0	0	0	0	0	0	0	0	0	0	0
51	Urumqi-Xi'an	0	0	0	0	0	0	0	0	0	0	0	0	0	0	0	0	0	0	0	0	0	0	0	0	0	0	0	0	0	0	0	0	0
52	Zhengzhou-Kunming	0	0	0	0	0	0	0	0	0	0	0	0	0	0	0	0	0	0	0	0	0	0	0	0	0	0	0	0	0	0	0	0	0
53	Guiyang-Shanghai	15365.6	0	0	0	0	0	0	0	0	2280.84	1950.29	0	0	0	3538.5	0	0	3914.29	0	0	0	0	0	3681.65	0	0	0	0	0	0	0	0	0
54	Kunming-Dehong	0	0	0	0	0	0	0	0	0	0	0	0	0	0	0	0	0	0	0	0	0	0	0	0	0	0	0	0	0	0	0	0	0
55	Kashgar-Urumqi	18699.4	0	0	0	0	0	0	0	0	0	0	0	0	0	0	0	0	0	0	0	0	18699.4	0	0	0	0	0	0	0	0	0	0	0
56	Haikou-Beijing	38256.4	1231.47	3549.64	0	4759.54	1565.55	0	0	0	0	0	0	2436.38	6628.41	0	0	5034.9	6608.84	0	1761.24	0	0	0	0	0	0	0	0	1963.92	0	0	0	2716.54
57	Chengdu-Lhasa	64396.4	0	0	0	0	0	0	0	0	0	0	0	0	0	0	0	0	0	25409.7	0	0	0	38986.7	0	0	0	0	0	0	0	0	0	0
58	Kunming-Shenzhen	0	0	0	0	0	0	0	0	0	0	0	0	0	0	0	0	0	0	0	0	0	0	0	0	0	0	0	0	0	0	0	0	0
59	Hangzhou-Xi'an	28442.2	0	0	0	0	7221.7	0	0	2378.87	6279.94	0	6898.72	0	0	0	0	0	0	0	0	0	0	0	0	0	0	0	0	5662.98	0	0	0	0
60	Guangzhou-Tianjin	55530.5	0	0	5916.84	11292.1	10735.3	0	0	0	0	0	0	10154.8	0	0	0	6146.89	11284.6	0	0	0	0	0	0	0	0	0	0	0	0	0	0	0
61	Haikou-Shenzhen	0	0	0	0	0	0	0	0	0	0	0	0	0	0	0	0	0	0	0	0	0	0	0	0	0	0	0	0	0	0	0	0	0
62	Kunming-Nanjing	0	0	0	0	0	0	0	0	0	0	0	0	0	0	0	0	0	0	0	0	0	0	0	0	0	0	0	0	0	0	0	0	0
63	Zhengzhou-Shenzhen	0	0	0	0	0	0	0	0	0	0	0	0	0	0	0	0	0	0	0	0	0	0	0	0	0	0	0	0	0	0	0	0	0
64	Kunming-Xi'an	0	0	0	0	0	0	0	0	0	0	0	0	0	0	0	0	0	0	0	0	0	0	0	0	0	0	0	0	0	0	0	0	0
65	Guangzhou-Zhengzhou	0	0	0	0	0	0	0	0	0	0	0	0	0	0	0	0	0	0	0	0	0	0	0	0	0	0	0	0	0	0	0	0	0
66	Guiyang-Beijing	81638.4	0	8148.26	0	17512.3	3362.48	0	12551	0	0	0	0	0	0	0	0	10687.9	4405.54	0	3204.65	0	0	0	16293.7	0	0	0	0	5472.61	0	0	0	0
67	Chengdu-Nanjing	15863.3	0	0	0	0	0	0	0	3207.16	0	0	1984.99	0	0	0	0	4613.93	0	4372.67	1684.54	0	0	0	0	0	0	0	0	0	0	0	0	0
68	ShanghaiPudong-Zhuhai	0	0	0	0	0	0	0	0	0	0	0	0	0	0	0	0	0	0	0	0	0	0	0	0	0	0	0	0	0	0	0	0	0
69	ShanghaiHongqiao-Zhuhai	0	0	0	0	0	0	0	0	0	0	0	0	0	0	0	0	0	0	0	0	0	0	0	0	0	0	0	0	0	0	0	0	0
70	Chongqing-Nanjing	23993.2	0	0	0	0	0	0	0	4852.43	0	0	5557.04	0	0	0	0	7917.38	0	0	5666.34	0	0	0	0	0	0	0	0	0	0	0	0	0
71	Changchun-Beijing	80550.1	0	19396.8	0	13467.6	0	0	0	0	0	0	0	0	0	0	0	0	0	0	0	25330.2	0	0	0	0	0	0	0	0	0	16172.9	6182.53	0
72	Zhengzhou-Shanghai	0	0	0	0	0	0	0	0	0	0	0	0	0	0	0	0	0	0	0	0	0	0	0	0	0	0	0	0	0	0	0	0	0
73	Fuzhou-Beijing	45986.7	0	6956.76	0	7500.64	0	8952.91	0	2013.75	0	0	8064.49	0	0	5704.85	6793.29	0	0	0	0	0	0	0	0	0	0	0	0	0	0	0	0	0
74	Yulin-Xi'an	0	0	0	0	0	0	0	0	0	0	0	0	0	0	0	0	0	0	0	0	0	0	0	0	0	0	0	0	0	0	0	0	0
75	Zhengzhou-Haikou	0	0	0	0	0	0	0	0	0	0	0	0	0	0	0	0	0	0	0	0	0	0	0	0	0	0	0	0	0	0	0	0	0
76	Guangzhou-Ningbo	10527.2	0	0	0	0	0	0	0	0	4129.45	0	0	2731.55	0	0	3666.23	0	0	0	0	0	0	0	0	0	0	0	0	0	0	0	0	0
77	Hangzhou-Guiyang	13926.9	0	0	0	0	0	0	0	0	4111.3	0	0	0	0	2683.38	0	0	3829.85	0	0	0	0	0	3302.4	0	0	0	0	0	0	0	0	0
78	Kunming-Wuhan	0	0	0	0	0	0	0	0	0	0	0	0	0	0	0	0	0	0	0	0	0	0	0	0	0	0	0	0	0	0	0	0	0
79	Nanchang-Beijing	59552.8	0	8338.21	3787.43	8616.95	4322.85	11973.2	0	0	0	0	13787.8	0	0	8726.3	0	0	0	0	0	0	0	0	0	0	0	0	0	0	0	0	0	0
80	Yinchuan-Xi'an	5932.3	0	0	0	0	0	0	0	0	0	0	0	0	0	0	0	0	0	0	0	0	0	0	0	0	1651.6	0	2165.63	2115.06	0	0	0	0
81	Zhengzhou-Chengdu	22361.6	0	0	0	0	7606.27	0	0	0	0	0	0	0	0	0	0	0	0	9040.32	0	0	0	0	0	0	0	0	0	5715.04	0	0	0	0
82	Shanghai-Taiyuan	0	0	0	0	0	0	0	0	0	0	0	0	0	0	0	0	0	0	0	0	0	0	0	0	0	0	0	0	0	0	0	0	0
83	Guangzhou-Wenzhou	10424	0	0	0	0	0	0	0	0	2614.36	0	0	4077.07	0	591.733	3140.84	0	0	0	0	0	0	0	0	0	0	0	0	0	0	0	0	0
84	Chengdu-Wuhan	23182	0	0	0	0	0	0	0	0	0	0	0	0	0	0	0	9989.06	0	9140.85	4052.13	0	0	0	0	0	0	0	0	0	0	0	0	0
85	Guangzhou-Wuhan	9758.56	0	0	0	0	0	0	0	0	0	0	0	3239.84	0	0	0	2993.97	3524.75	0	0	0	0	0	0	0	0	0	0	0	0	0	0	0
86	Chengdu-Sanya	21787.9	0	0	0	0	0	0	0	0	0	0	0	0	5973.44	0	0	0	0	6401.79	0	0	0	0	5503.66	0	0	0	0	0	0	0	0	3909.02
87	Chengdu-Urumqi	44571.1	0	0	0	0	0	0	0	0	0	0	0	0	0	0	0	0	0	9208.16	0	0	12732.5	0	0	0	22630.4	0	0	0	0	0	0	0
88	Guangzhou-Wuxi	0	0	0	0	0	0	0	0	0	0	0	0	0	0	0	0	0	0	0	0	0	0	0	0	0	0	0	0	0	0	0	0	0
89	Nanning-Shanghai	13363.1	0	0	0	0	0	0	0	0	2144.69	1960.42	0	0	3485.87	3476.62	0	0	2295.5	0	0	0	0	0	0	0	0	0	0	0	0	0	0	0
90	Nanjing-Xi'an	0	0	0	0	0	0	0	0	0	0	0	0	0	0	0	0	0	0	0	0	0	0	0	0	0	0	0	0	0	0	0	0	0
91	Hangzhou-Kunming	25719	0	0	0	0	0	0	0	0	4755.98	0	0	0	0	5857.73	0	0	6076.27	0	0	0	0	0	5147.2	3881.82	0	0	0	0	0	0	0	0
92	Fuzhou-Shanghai	0	0	0	0	0	0	0	0	0	0	0	0	0	0	0	0	0	0	0	0	0	0	0	0	0	0	0	0	0	0	0	0	0
93	Beijing-Lanzhou	60757.2	0	9932.94	0	5354.81	0	0	3407.61	0	0	0	0	0	0	0	0	0	0	0	0	27111.1	0	0	0	0	11393.3	0	3557.39	0	0	0	0	0
94	Harbin-Qingdao	0	0	0	0	0	0	0	0	0	0	0	0	0	0	0	0	0	0	0	0	0	0	0	0	0	0	0	0	0	0	0	0	0
95	Nanjing-Beijing	54521.5	0	10465.9	0	9029.38	0	16631.2	0	17658.5	0	0	736.536	0	0	0	0	0	0	0	0	0	0	0	0	0	0	0	0	0	0	0	0	0
96	Guiyang-Nanjing	0	0	0	0	0	0	0	0	0	0	0	0	0	0	0	0	0	0	0	0	0	0	0	0	0	0	0	0	0	0	0	0	0
97	Hotan-Urumqi	0	0	0	0	0	0	0	0	0	0	0	0	0	0	0	0	0	0	0	0	0	0	0	0	0	0	0	0	0	0	0	0	0
98	ShanghaiHongqiao-Urumqi	0	0	0	0	0	0	0	0	0	0	0	0	0	0	0	0	0	0	0	0	0	0	0	0	0	0	0	0	0	0	0	0	0
99	ShanghaiPudong-Urumqi	0	0	0	0	0	0	0	0	0	0	0	0	0	0	0	0	0	0	0	0	0	0	0	0	0	0	0	0	0	0	0	0	0
100	Kunming-Lijiang	0	0	0	0	0	0	0	0	0	0	0	0	0	0	0	0	0	0	0	0	0	0	0	0	0	0	0	0	0	0	0	0	0
101	Haikou-Changsha	0	0	0	0	0	0	0	0	0	0	0	0	0	0	0	0	0	0	0	0	0	0	0	0	0	0	0	0	0	0	0	0	0
102	Zhengzhou-Urumqi	0	0	0	0	0	0	0	0	0	0	0	0	0	0	0	0	0	0	0	0	0	0	0	0	0	0	0	0	0	0	0	0	0
103	Changsha-Xi'an	0	0	0	0	0	0	0	0	0	0	0	0	0	0	0	0	0	0	0	0	0	0	0	0	0	0	0	0	0	0	0	0	0
104	Hohhot-Beijing	58897.5	0	12848.2	0	12947.7	0	0	6329.78	0	0	0	0	0	0	0	0	0	0	0	0	26771.8	0	0	0	0	0	0	0	0	0	0	0	0
105	Urumqi-Lanzhou	0	0	0	0	0	0	0	0	0	0	0	0	0	0	0	0	0	0	0	0	0	0	0	0	0	0	0	0	0	0	0	0	0
106	Nanning-Beijing	68180.8	0	8388.68	0	11667.9	2150.77	0	9839.79	0	0	0	0	0	14303.3	0	0	6721.17	10592.6	0	2312.08	0	0	0	0	0	0	0	0	2204.54	0	0	0	0
107	Chongqing-Changsha	7453.71	0	0	0	0	0	0	0	0	0	0	0	0	0	0	0	826.113	4322.14	0	2305.45	0	0	0	0	0	0	0	0	0	0	0	0	0
108	Chongqing-Xi'an	0	0	0	0	0	0	0	0	0	0	0	0	0	0	0	0	0	0	0	0	0	0	0	0	0	0	0	0	0	0	0	0	0
109	Shenzhen-Wuxi	0	0	0	0	0	0	0	0	0	0	0	0	0	0	0	0	0	0	0	0	0	0	0	0	0	0	0	0	0	0	0	0	0
110	Chongqing-Sanya	0	0	0	0	0	0	0	0	0	0	0	0	0	0	0	0	0	0	0	0	0	0	0	0	0	0	0	0	0	0	0	0	0
111	Shenzhen-Tianjin	48957.3	0	2980.67	3147.4	8815.37	10939	0	0	0	0	0	0	7894.95	0	0	0	3573.85	11606.1	0	0	0	0	0	0	0	0	0	0	0	0	0	0	0
112	Beijing-Shenyang	38778.9	0	9533.38	0	6597.35	0	0	0	0	0	0	0	0	0	0	0	0	0	0	0	0	0	0	0	0	0	0	0	0	0	0	22648.2	0
113	Guangzhou-Sanya	0	0	0	0	0	0	0	0	0	0	0	0	0	0	0	0	0	0	0	0	0	0	0	0	0	0	0	0	0	0	0	0	0
114	Chengdu-Tianjin	29131.5	0	0	3975.83	4936.35	0	0	6183.85	0	0	0	0	0	0	0	0	0	0	7499.17	0	0	0	0	0	0	0	0	0	6536.34	0	0	0	0
115	Chengdu-Changsha	20828.2	0	0	0	0	0	0	0	0	0	0	0	0	0	0	0	2536.91	9414.52	4717.81	4159.01	0	0	0	0	0	0	0	0	0	0	0	0	0
116	Xi'an-Xining	0	0	0	0	0	0	0	0	0	0	0	0	0	0	0	0	0	0	0	0	0	0	0	0	0	0	0	0	0	0	0	0	0
117	Haikou-Shanghai	13896.1	1873.82	0	0	0	0	0	0	0	2518.62	1195.66	0	4048.46	0	0	2754.68	0	0	0	0	0	0	0	0	0	0	0	0	0	0	0	0	1504.84
118	Chongqing-Haikou	0	0	0	0	0	0	0	0	0	0	0	0	0	0	0	0	0	0	0	0	0	0	0	0	0	0	0	0	0	0	0	0	0
119	Guangzhou-Jinan	0	0	0	0	0	0	0	0	0	0	0	0	0	0	0	0	0	0	0	0	0	0	0	0	0	0	0	0	0	0	0	0	0
120	Kunming-Xiamen	0	0	0	0	0	0	0	0	0	0	0	0	0	0	0	0	0	0	0	0	0	0	0	0	0	0	0	0	0	0	0	0	0
121	Beijing-Yantai	23186.5	8319.4	4774.75	4628.56	0	0	5463.75	0	0	0	0	0	0	0	0	0	0	0	0	0	0	0	0	0	0	0	0	0	0	0	0	0	0
122	Chengdu-Jinan	15583.6	0	0	0	0	4665.92	3001.21	0	0	0	0	0	0	0	0	0	0	0	4697.39	0	0	0	0	0	0	0	0	0	3219.12	0	0	0	0
123	Nanjing-Xiamen	0	0	0	0	0	0	0	0	0	0	0	0	0	0	0	0	0	0	0	0	0	0	0	0	0	0	0	0	0	0	0	0	0
124	Zhengzhou-Xiamen	12656	0	0	0	0	4026.86	0	0	0	0	0	3392.58	0	0	1655.54	3581.02	0	0	0	0	0	0	0	0	0	0	0	0	0	0	0	0	0
125	Changsha-Kunming	0	0	0	0	0	0	0	0	0	0	0	0	0	0	0	0	0	0	0	0	0	0	0	0	0	0	0	0	0	0	0	0	0
126	Yinchuan-Beijing	47165	0	9113.24	0	4453.41	0	0	2148.72	0	0	0	0	0	0	0	0	0	0	0	0	24654.9	0	0	0	0	0	0	6794.7	0	0	0	0	0
127	Beijing-Zhuhai	64034.9	0	6847.52	0	14109.2	11392.2	0	0	0	0	0	0	13145.4	0	0	0	6474.52	12066	0	0	0	0	0	0	0	0	0	0	0	0	0	0	0
128	Chongqing-Tianjin	10425.5	0	0	1101	1582.39	285.96	0	2040.16	0	0	0	0	0	0	0	0	0	0	1353.5	2809.19	0	0	0	0	0	0	0	0	1253.33	0	0	0	0
129	Hefei-Shenzhen	10923.2	0	0	0	0	0	0	0	0	0	0	2596.72	2614.64	0	5711.85	0	0	0	0	0	0	0	0	0	0	0	0	0	0	0	0	0	0
130	Shanghai-Lanzhou	12436.9	0	0	0	0	2890.15	0	0	1473.81	0	1597.37	2042.66	0	0	0	0	0	0	0	0	0	0	0	0	0	2343.85	0	384.85	1704.25	0	0	0	0
131	Chongqing-Xiamen	9906.82	0	0	0	0	0	0	0	0	0	0	0	1931.06	1477.02	0	2389.81	0	0	0	1538.63	0	0	0	2570.29	0	0	0	0	0	0	0	0	0
132	Chongqing-Jinan	0	0	0	0	0	0	0	0	0	0	0	0	0	0	0	0	0	0	0	0	0	0	0	0	0	0	0	0	0	0	0	0	0
133	Dalian-Nanjing	8868.65	2295.85	0	0	0	0	1850.59	0	3208.67	0	0	283.564	0	0	0	0	0	0	0	0	0	0	0	0	0	0	0	0	0	0	0	1229.97	0
134	Guilin-Shanghai	12677.8	0	0	0	0	0	0	0	0	2616.52	1986.52	0	0	1891.6	3777.2	0	0	2405.92	0	0	0	0	0	0	0	0	0	0	0	0	0	0	0
135	Zhengzhou-Chongqing	11149	0	0	0	0	3048.28	0	0	0	0	0	0	0	0	0	0	0	0	2579.31	2464.42	0	0	0	0	0	0	0	0	3057.01	0	0	0	0
136	Changsha-Tianjin	10850.5	0	0	1785.43	2367.79	2995.46	0	0	0	0	0	0	0	0	0	0	1545.81	2156.02	0	0	0	0	0	0	0	0	0	0	0	0	0	0	0
137	Chengdu-Qingdao	16952.1	0	0	0	0	3823.94	5670.85	0	0	0	0	0	0	0	0	0	0	0	4842.75	0	0	0	0	0	0	0	0	0	2614.59	0	0	0	0
138	Changsha-Xiamen	0	0	0	0	0	0	0	0	0	0	0	0	0	0	0	0	0	0	0	0	0	0	0	0	0	0	0	0	0	0	0	0	0
139	Urumqi-Yining	6279.49	0	0	0	0	0	0	0	0	0	0	0	0	0	0	0	0	0	0	0	0	6279.49	0	0	0	0	0	0	0	0	0	0	0
140	Tianjin-Xi'an	9784.34	0	0	1407.48	2513.73	0	0	3067.88	0	0	0	0	0	0	0	0	0	0	0	0	0	0	0	0	0	0	0	0	2795.25	0	0	0	0
141	ShanghaiPudong-Shijiangzhuang	0	0	0	0	0	0	0	0	0	0	0	0	0	0	0	0	0	0	0	0	0	0	0	0	0	0	0	0	0	0	0	0	0
142	ShanghaiHongqiao-Shijiangzhuang	0	0	0	0	0	0	0	0	0	0	0	0	0	0	0	0	0	0	0	0	0	0	0	0	0	0	0	0	0	0	0	0	0
143	ShanghaiHongqiao-Yantai	0	0	0	0	0	0	0	0	0	0	0	0	0	0	0	0	0	0	0	0	0	0	0	0	0	0	0	0	0	0	0	0	0
144	ShanghaiPudong-Yantai	0	0	0	0	0	0	0	0	0	0	0	0	0	0	0	0	0	0	0	0	0	0	0	0	0	0	0	0	0	0	0	0	0
145	Zhengzhou-Hangzhou	0	0	0	0	0	0	0	0	0	0	0	0	0	0	0	0	0	0	0	0	0	0	0	0	0	0	0	0	0	0	0	0	0
146	Nanchang-Xi'an	0	0	0	0	0	0	0	0	0	0	0	0	0	0	0	0	0	0	0	0	0	0	0	0	0	0	0	0	0	0	0	0	0
147	Shenzhen-Jinan	0	0	0	0	0	0	0	0	0	0	0	0	0	0	0	0	0	0	0	0	0	0	0	0	0	0	0	0	0	0	0	0	0
148	Guangzhou-Urumqi	25671.6	0	0	0	0	0	0	0	0	0	0	0	2357.13	1685.74	0	0	0	0	4717.83	0	0	7368.97	0	2721.92	0	4327.47	2492.55	0	0	0	0	0	0
149	Guiyang-Xi'an	0	0	0	0	0	0	0	0	0	0	0	0	0	0	0	0	0	0	0	0	0	0	0	0	0	0	0	0	0	0	0	0	0
150	Shenzhen-Wuhan	10501.1	0	0	0	0	0	0	0	0	0	0	0	2861.56	0	0	0	2960.77	4678.74	0	0	0	0	0	0	0	0	0	0	0	0	0	0	0
151	Zhengzhou-Shenyang	0	0	0	0	0	0	0	0	0	0	0	0	0	0	0	0	0	0	0	0	0	0	0	0	0	0	0	0	0	0	0	0	0
152	Kunming-Tianjin	22937.1	0	0	2165.48	4300.82	0	0	3856.38	0	0	0	0	0	0	0	0	0	0	4917.18	0	0	0	0	0	3563.73	0	0	0	4133.47	0	0	0	0
153	Ningbo-Beijing	33338.1	0	5743.88	0	4677.77	0	7344.87	0	9682.72	5888.83	0	0	0	0	0	0	0	0	0	0	0	0	0	0	0	0	0	0	0	0	0	0	0
154	Kunming-Jinan	0	0	0	0	0	0	0	0	0	0	0	0	0	0	0	0	0	0	0	0	0	0	0	0	0	0	0	0	0	0	0	0	0
155	Changsha-Sanya	0	0	0	0	0	0	0	0	0	0	0	0	0	0	0	0	0	0	0	0	0	0	0	0	0	0	0	0	0	0	0	0	0
156	Aksu-Urumqi	10920.9	0	0	0	0	0	0	0	0	0	0	0	0	0	0	0	0	0	0	0	0	10920.9	0	0	0	0	0	0	0	0	0	0	0
157	Hangzhou-Taiyuan	10486	0	0	0	0	2829.64	0	1762.54	1203	2064.94	0	2625.85	0	0	0	0	0	0	0	0	0	0	0	0	0	0	0	0	0	0	0	0	0
158	Hangzhou-Qingdao	0	0	0	0	0	0	0	0	0	0	0	0	0	0	0	0	0	0	0	0	0	0	0	0	0	0	0	0	0	0	0	0	0
159	Wuhan-Xiamen	11118.8	0	0	0	0	0	0	0	0	0	0	0	0	0	3272.81	4094.7	3751.28	0	0	0	0	0	0	0	0	0	0	0	0	0	0	0	0
160	Haikou-Hangzhou	0	0	0	0	0	0	0	0	0	0	0	0	0	0	0	0	0	0	0	0	0	0	0	0	0	0	0	0	0	0	0	0	0
161	Zhengzhou-Sanya	0	0	0	0	0	0	0	0	0	0	0	0	0	0	0	0	0	0	0	0	0	0	0	0	0	0	0	0	0	0	0	0	0
162	Chongqing-Urumqi	15661.2	0	0	0	0	0	0	0	0	0	0	0	0	0	0	0	0	0	3141.39	1414.46	0	4796.65	0	0	0	3881.96	2426.71	0	0	0	0	0	0
163	Guilin-Xi'an	10810.6	0	0	0	0	0	0	0	0	0	0	0	0	1751.27	0	0	1212	3954.77	0	1164.47	0	0	0	0	0	0	0	0	2728.08	0	0	0	0
164	Guiyang-Wenzhou	16933.6	0	0	0	0	0	0	0	0	2865.44	0	0	0	0	3627.08	1556.04	0	4146.09	0	0	0	0	0	4738.94	0	0	0	0	0	0	0	0	0
165	Jinan-Xi'an	0	0	0	0	0	0	0	0	0	0	0	0	0	0	0	0	0	0	0	0	0	0	0	0	0	0	0	0	0	0	0	0	0
166	Shanghai-Jieyang	0	0	0	0	0	0	0	0	0	0	0	0	0	0	0	0	0	0	0	0	0	0	0	0	0	0	0	0	0	0	0	0	0
167	Chongqing-Lhasa	12977.4	0	0	0	0	0	0	0	0	0	0	0	0	0	0	0	0	0	5107.54	1755.68	0	0	6114.22	0	0	0	0	0	0	0	0	0	0
168	Nanning-Xi'an	0	0	0	0	0	0	0	0	0	0	0	0	0	0	0	0	0	0	0	0	0	0	0	0	0	0	0	0	0	0	0	0	0
169	Qingdao-Xi'an	0	0	0	0	0	0	0	0	0	0	0	0	0	0	0	0	0	0	0	0	0	0	0	0	0	0	0	0	0	0	0	0	0
170	Tianjin-Xiamen	13740.3	0	0	1714.14	859.336	0	2537.94	0	424.833	0	0	3408.33	0	0	1237.2	3558.53	0	0	0	0	0	0	0	0	0	0	0	0	0	0	0	0	0
171	Guangzhou-Xiamen	0	0	0	0	0	0	0	0	0	0	0	0	0	0	0	0	0	0	0	0	0	0	0	0	0	0	0	0	0	0	0	0	0
172	Kunming-Tengchong	0	0	0	0	0	0	0	0	0	0	0	0	0	0	0	0	0	0	0	0	0	0	0	0	0	0	0	0	0	0	0	0	0
173	Guangzhou-Qingdao	0	0	0	0	0	0	0	0	0	0	0	0	0	0	0	0	0	0	0	0	0	0	0	0	0	0	0	0	0	0	0	0	0
174	Haikou-Nanchang	0	0	0	0	0	0	0	0	0	0	0	0	0	0	0	0	0	0	0	0	0	0	0	0	0	0	0	0	0	0	0	0	0
175	Hangzhou-Nanning	14734.5	0	0	0	0	0	0	0	0	2820.02	0	0	0	4275.78	3778.03	0	0	3860.66	0	0	0	0	0	0	0	0	0	0	0	0	0	0	0
176	Beijing-Wenzhou	55385.8	0	8956.45	0	5943.02	0	10663.6	0	11944.4	15281.7	2596.61	0	0	0	0	0	0	0	0	0	0	0	0	0	0	0	0	0	0	0	0	0	0
177	Chifeng-Hohhot	6903.38	0	0	0	2264.11	0	0	0	0	0	0	0	0	0	0	0	0	0	0	0	4639.27	0	0	0	0	0	0	0	0	0	0	0	0
178	Guangzhou-Hefei	0	0	0	0	0	0	0	0	0	0	0	0	0	0	0	0	0	0	0	0	0	0	0	0	0	0	0	0	0	0	0	0	0
179	Quanzhou-Shanghai	0	0	0	0	0	0	0	0	0	0	0	0	0	0	0	0	0	0	0	0	0	0	0	0	0	0	0	0	0	0	0	0	0
180	Harbin-Nanjing	0	0	0	0	0	0	0	0	0	0	0	0	0	0	0	0	0	0	0	0	0	0	0	0	0	0	0	0	0	0	0	0	0
181	Xi'an-Xiamen	0	0	0	0	0	0	0	0	0	0	0	0	0	0	0	0	0	0	0	0	0	0	0	0	0	0	0	0	0	0	0	0	0
182	Shenyang-Qingdao	0	0	0	0	0	0	0	0	0	0	0	0	0	0	0	0	0	0	0	0	0	0	0	0	0	0	0	0	0	0	0	0	0
183	Sanya-Xi'an	0	0	0	0	0	0	0	0	0	0	0	0	0	0	0	0	0	0	0	0	0	0	0	0	0	0	0	0	0	0	0	0	0
184	Beijing-Xining	29008.1	0	3369.49	0	2608.1	0	0	0	0	0	0	0	0	0	0	0	0	0	0	0	13888.9	0	0	0	0	3937.95	3611.67	1592.09	0	0	0	0	0
185	Hangzhou-Xiamen	0	0	0	0	0	0	0	0	0	0	0	0	0	0	0	0	0	0	0	0	0	0	0	0	0	0	0	0	0	0	0	0	0
186	Sanya-Shenzhen	0	0	0	0	0	0	0	0	0	0	0	0	0	0	0	0	0	0	0	0	0	0	0	0	0	0	0	0	0	0	0	0	0
187	Chengdu-Xiamen	10156	0	0	0	0	0	0	0	0	0	0	0	2449	1746.88	0	1710.94	0	0	2259.74	0	0	0	0	1989.49	0	0	0	0	0	0	0	0	0
188	Hangzhou-Harbin	19019.4	6686.71	0	0	0	0	2806.91	0	0	1770.91	483.964	0	0	0	0	0	0	0	0	0	0	0	0	0	0	0	0	0	0	1438.75	2702.7	3129.41	0
189	Hangzhou-Shenyang	0	0	0	0	0	0	0	0	0	0	0	0	0	0	0	0	0	0	0	0	0	0	0	0	0	0	0	0	0	0	0	0	0
190	Hangzhou-Sanya	0	0	0	0	0	0	0	0	0	0	0	0	0	0	0	0	0	0	0	0	0	0	0	0	0	0	0	0	0	0	0	0	0
191	Zhengzhou-Guiyang	0	0	0	0	0	0	0	0	0	0	0	0	0	0	0	0	0	0	0	0	0	0	0	0	0	0	0	0	0	0	0	0	0
192	Haikou-Wuhan	11818.8	175.021	0	0	0	0	0	0	0	0	0	0	1618.94	2300.79	0	0	2576.7	3616.37	0	0	0	0	0	0	0	0	0	0	0	0	0	0	1530.95
193	Changchun-Nanjing	0	0	0	0	0	0	0	0	0	0	0	0	0	0	0	0	0	0	0	0	0	0	0	0	0	0	0	0	0	0	0	0	0
194	Sanya-Wuhan	0	0	0	0	0	0	0	0	0	0	0	0	0	0	0	0	0	0	0	0	0	0	0	0	0	0	0	0	0	0	0	0	0
195	Hohhot-Hailar	0	0	0	0	0	0	0	0	0	0	0	0	0	0	0	0	0	0	0	0	0	0	0	0	0	0	0	0	0	0	0	0	0
196	Qingdao-Wuhan	9533.17	0	0	0	0	4207.36	3409.32	0	0	0	0	0	0	0	0	0	1916.48	0	0	0	0	0	0	0	0	0	0	0	0	0	0	0	0
197	Zhengzhou-Nanning	0	0	0	0	0	0	0	0	0	0	0	0	0	0	0	0	0	0	0	0	0	0	0	0	0	0	0	0	0	0	0	0	0
198	Nanchang-Shenzhen	0	0	0	0	0	0	0	0	0	0	0	0	0	0	0	0	0	0	0	0	0	0	0	0	0	0	0	0	0	0	0	0	0
199	Harbin-Jinan	0	0	0	0	0	0	0	0	0	0	0	0	0	0	0	0	0	0	0	0	0	0	0	0	0	0	0	0	0	0	0	0	0
200	Dalian-Hangzhou	0	0	0	0	0	0	0	0	0	0	0	0	0	0	0	0	0	0	0	0	0	0	0	0	0	0	0	0	0	0	0	0	0
201	Chengdu-Nanning	9333.88	0	0	0	0	0	0	0	0	0	0	0	0	2864.87	0	0	0	0	3576.91	0	0	0	0	2892.09	0	0	0	0	0	0	0	0	0
202	Chengdu-Lanzhou	9540.4	0	0	0	0	0	0	0	0	0	0	0	0	0	0	0	0	0	4536.75	0	0	0	0	0	0	5003.65	0	0	0	0	0	0	0
203	Zhengzhou-Dalian	0	0	0	0	0	0	0	0	0	0	0	0	0	0	0	0	0	0	0	0	0	0	0	0	0	0	0	0	0	0	0	0	0
204	Dalian-Xi'an	8286.6	112.456	0	540.442	1974.52	0	0	1924.85	0	0	0	0	0	0	0	0	0	0	0	0	0	0	0	0	0	0	0	0	2732.69	0	0	1001.64	0
205	Kunming-Taiyuan	0	0	0	0	0	0	0	0	0	0	0	0	0	0	0	0	0	0	0	0	0	0	0	0	0	0	0	0	0	0	0	0	0
206	Baoshan-Kunming	0	0	0	0	0	0	0	0	0	0	0	0	0	0	0	0	0	0	0	0	0	0	0	0	0	0	0	0	0	0	0	0	0
207	Haikou-Kunming	0	0	0	0	0	0	0	0	0	0	0	0	0	0	0	0	0	0	0	0	0	0	0	0	0	0	0	0	0	0	0	0	0
208	Dalian-Tianjin	6624.41	2664.92	0	1945.23	0	0	0	0	0	0	0	0	0	0	0	0	0	0	0	0	0	0	0	0	0	0	0	0	0	0	0	2014.27	0
209	Dalian-Jinan	6504.83	2218.15	0	0	0	0	2855.72	0	0	0	0	0	0	0	0	0	0	0	0	0	0	0	0	0	0	0	0	0	0	0	0	1430.96	0
210	Guangzhou-Taiyuan	0	0	0	0	0	0	0	0	0	0	0	0	0	0	0	0	0	0	0	0	0	0	0	0	0	0	0	0	0	0	0	0	0
211	Nanjing-Shenyang	0	0	0	0	0	0	0	0	0	0	0	0	0	0	0	0	0	0	0	0	0	0	0	0	0	0	0	0	0	0	0	0	0
212	Guangzhou-Shenyang	0	0	0	0	0	0	0	0	0	0	0	0	0	0	0	0	0	0	0	0	0	0	0	0	0	0	0	0	0	0	0	0	0
213	Hangzhou-Tianjin	18211.4	0	0	2431.69	1568.31	0	4974.26	0	5234.57	3409.79	0	592.787	0	0	0	0	0	0	0	0	0	0	0	0	0	0	0	0	0	0	0	0	0
214	Guiyang-Shenzhen	13226.9	0	0	0	0	0	0	0	0	0	0	0	5018.68	4096.07	0	0	0	0	0	0	0	0	0	4112.16	0	0	0	0	0	0	0	0	0
215	Baotou-Beijing	27233	0	7457.55	0	3741.41	0	0	3636.45	0	0	0	0	0	0	0	0	0	0	0	0	12397.6	0	0	0	0	0	0	0	0	0	0	0	0
216	Nanjing-Nanning	0	0	0	0	0	0	0	0	0	0	0	0	0	0	0	0	0	0	0	0	0	0	0	0	0	0	0	0	0	0	0	0	0
217	Haikou-Nanjing	0	0	0	0	0	0	0	0	0	0	0	0	0	0	0	0	0	0	0	0	0	0	0	0	0	0	0	0	0	0	0	0	0
218	Harbin-Tianjin	10096.8	593.942	0	1691.25	1338.44	0	0	0	0	0	0	0	0	0	0	0	0	0	0	0	0	0	0	0	0	0	0	0	0	1533.09	2339.17	2600.92	0
219	Hefei-Kunming	0	0	0	0	0	0	0	0	0	0	0	0	0	0	0	0	0	0	0	0	0	0	0	0	0	0	0	0	0	0	0	0	0
220	Changsha-Nanjing	0	0	0	0	0	0	0	0	0	0	0	0	0	0	0	0	0	0	0	0	0	0	0	0	0	0	0	0	0	0	0	0	0
221	Chongqing-Hefei	0	0	0	0	0	0	0	0	0	0	0	0	0	0	0	0	0	0	0	0	0	0	0	0	0	0	0	0	0	0	0	0	0
222	Guiyang-Xiamen	0	0	0	0	0	0	0	0	0	0	0	0	0	0	0	0	0	0	0	0	0	0	0	0	0	0	0	0	0	0	0	0	0
223	Chengdu-Guiyang	15302.3	0	0	0	0	0	0	0	0	0	0	0	0	0	0	0	0	0	9676.79	0	0	0	0	5625.53	0	0	0	0	0	0	0	0	0
224	Kunming-Wenzhou	26374.6	0	0	0	0	0	0	0	0	4567.94	0	0	0	0	5381.38	685.495	0	5454.99	0	0	0	0	0	5791.71	4493.12	0	0	0	0	0	0	0	0
225	Haikou-Guiyang	10898.2	21.0981	0	0	0	0	0	0	0	0	0	0	1121.08	5251.51	0	0	0	0	0	0	0	0	0	3198.31	0	0	0	0	0	0	0	0	1306.19
226	Shenyang-Wuhan	14292.1	1131.4	0	0	638.75	3331.69	3187.64	0	0	0	0	0	0	0	0	0	2363.59	0	0	0	0	0	0	0	0	0	0	0	0	0	0	3639.05	0
227	Hangzhou-Shijiangzhuang	0	0	0	0	0	0	0	0	0	0	0	0	0	0	0	0	0	0	0	0	0	0	0	0	0	0	0	0	0	0	0	0	0
228	Zhengzhou-Fuzhou	0	0	0	0	0	0	0	0	0	0	0	0	0	0	0	0	0	0	0	0	0	0	0	0	0	0	0	0	0	0	0	0	0
229	Guangzhou-Harbin	0	0	0	0	0	0	0	0	0	0	0	0	0	0	0	0	0	0	0	0	0	0	0	0	0	0	0	0	0	0	0	0	0
230	Chengdu-Wenzhou	23263.1	0	0	0	0	0	0	0	0	3825.31	0	0	0	0	4998.33	0	0	4787.53	6685.92	2966	0	0	0	0	0	0	0	0	0	0	0	0	0
231	Shanghai-Wenzhou	7615.88	3464.84	0	0	0	0	0	0	0	2351.12	1799.93	0	0	0	0	0	0	0	0	0	0	0	0	0	0	0	0	0	0	0	0	0	0
232	Zhengzhou-Harbin	0	0	0	0	0	0	0	0	0	0	0	0	0	0	0	0	0	0	0	0	0	0	0	0	0	0	0	0	0	0	0	0	0
233	Chongqing-Wuhan	7475.21	0	0	0	0	0	0	0	0	0	0	0	0	0	0	0	5213.99	0	0	2261.22	0	0	0	0	0	0	0	0	0	0	0	0	0
234	Hangzhou-Zhuhai	0	0	0	0	0	0	0	0	0	0	0	0	0	0	0	0	0	0	0	0	0	0	0	0	0	0	0	0	0	0	0	0	0
235	Harbin-Yantai	0	0	0	0	0	0	0	0	0	0	0	0	0	0	0	0	0	0	0	0	0	0	0	0	0	0	0	0	0	0	0	0	0
236	Changchun-Qingdao	0	0	0	0	0	0	0	0	0	0	0	0	0	0	0	0	0	0	0	0	0	0	0	0	0	0	0	0	0	0	0	0	0
237	Sanya-Tianjin	13951.7	0	0	941.012	1669.49	737.45	0	1905.99	0	0	0	0	616.205	2025.24	0	0	1556.73	1825.66	0	518.909	0	0	0	0	0	0	0	0	409.14	0	0	0	1745.82
238	Shenyang-Xi'an	0	0	0	0	0	0	0	0	0	0	0	0	0	0	0	0	0	0	0	0	0	0	0	0	0	0	0	0	0	0	0	0	0
239	Xi'an-Zhuhai	0	0	0	0	0	0	0	0	0	0	0	0	0	0	0	0	0	0	0	0	0	0	0	0	0	0	0	0	0	0	0	0	0
240	Chengdu-Shenyang	11244.6	0	461.07	0	2448.81	0	0	1866.75	0	0	0	0	0	0	0	0	0	0	2227.58	0	0	0	0	0	0	0	0	0	1826.13	0	0	2414.25	0
241	Hangzhou-Lanzhou	23648.2	0	0	0	0	5700.5	0	0	0	3466.32	0	4896.1	0	0	0	0	0	0	0	0	0	0	0	0	0	5384.31	0	1185.67	3015.31	0	0	0	0
242	Shenyang-Shenzhen	0	0	0	0	0	0	0	0	0	0	0	0	0	0	0	0	0	0	0	0	0	0	0	0	0	0	0	0	0	0	0	0	0
243	Shenzhen-Qingdao	0	0	0	0	0	0	0	0	0	0	0	0	0	0	0	0	0	0	0	0	0	0	0	0	0	0	0	0	0	0	0	0	0
244	Lhasa-Xi'an	0	0	0	0	0	0	0	0	0	0	0	0	0	0	0	0	0	0	0	0	0	0	0	0	0	0	0	0	0	0	0	0	0
245	Zhengzhou-Zhuhai	0	0	0	0	0	0	0	0	0	0	0	0	0	0	0	0	0	0	0	0	0	0	0	0	0	0	0	0	0	0	0	0	0
246	Guangzhou-Fuzhou	0	0	0	0	0	0	0	0	0	0	0	0	0	0	0	0	0	0	0	0	0	0	0	0	0	0	0	0	0	0	0	0	0
247	Nanning-Wuhan	0	0	0	0	0	0	0	0	0	0	0	0	0	0	0	0	0	0	0	0	0	0	0	0	0	0	0	0	0	0	0	0	0
248	Nanchang-Kunming	0	0	0	0	0	0	0	0	0	0	0	0	0	0	0	0	0	0	0	0	0	0	0	0	0	0	0	0	0	0	0	0	0
249	Chongqing-Lijiang	0	0	0	0	0	0	0	0	0	0	0	0	0	0	0	0	0	0	0	0	0	0	0	0	0	0	0	0	0	0	0	0	0
250	Chengdu-Hefei	12253.1	0	0	0	0	0	0	0	0	0	0	2466.32	0	0	0	0	3744.68	0	3732.56	2309.51	0	0	0	0	0	0	0	0	0	0	0	0	0
251	Nanjing-Taiyuan	0	0	0	0	0	0	0	0	0	0	0	0	0	0	0	0	0	0	0	0	0	0	0	0	0	0	0	0	0	0	0	0	0
252	Chongqing-Nanning	0	0	0	0	0	0	0	0	0	0	0	0	0	0	0	0	0	0	0	0	0	0	0	0	0	0	0	0	0	0	0	0	0
253	Changsha-Qingdao	0	0	0	0	0	0	0	0	0	0	0	0	0	0	0	0	0	0	0	0	0	0	0	0	0	0	0	0	0	0	0	0	0
254	Fuzhou-Xi'an	0	0	0	0	0	0	0	0	0	0	0	0	0	0	0	0	0	0	0	0	0	0	0	0	0	0	0	0	0	0	0	0	0
255	Hangzhou-Guilin	0	0	0	0	0	0	0	0	0	0	0	0	0	0	0	0	0	0	0	0	0	0	0	0	0	0	0	0	0	0	0	0	0
256	Chongqing-Zhuhai	15681.9	0	0	0	0	0	0	0	0	0	0	0	4556.87	3342.43	0	0	0	0	0	4108.35	0	0	0	3674.28	0	0	0	0	0	0	0	0	0
257	Urumqi-Wuhan	0	0	0	0	0	0	0	0	0	0	0	0	0	0	0	0	0	0	0	0	0	0	0	0	0	0	0	0	0	0	0	0	0
258	Hohhot-Shanghai	22147.2	0	0	0	0	4492.8	0	5846.39	2857.72	0	3426.92	2851.6	0	0	0	0	0	0	0	0	2671.8	0	0	0	0	0	0	0	0	0	0	0	0
259	Chongqing-Fuzhou	11211.6	0	0	0	0	0	0	0	0	0	0	0	0	0	2750.87	3157.21	0	2873.96	0	2429.52	0	0	0	0	0	0	0	0	0	0	0	0	0
260	Xishuangbanna-Lijiang	0	0	0	0	0	0	0	0	0	0	0	0	0	0	0	0	0	0	0	0	0	0	0	0	0	0	0	0	0	0	0	0	0
261	Changsha-Jinan	9444.85	0	0	0	541.516	3105.53	2278.04	0	0	0	0	0	0	0	0	0	1562.84	1956.91	0	0	0	0	0	0	0	0	0	0	0	0	0	0	0
262	Guangzhou-Changchun	0	0	0	0	0	0	0	0	0	0	0	0	0	0	0	0	0	0	0	0	0	0	0	0	0	0	0	0	0	0	0	0	0
263	Haikou-Nanning	0	0	0	0	0	0	0	0	0	0	0	0	0	0	0	0	0	0	0	0	0	0	0	0	0	0	0	0	0	0	0	0	0
264	Hangzhou-Wuhan	0	0	0	0	0	0	0	0	0	0	0	0	0	0	0	0	0	0	0	0	0	0	0	0	0	0	0	0	0	0	0	0	0
265	Chengdu-Wuxi	0	0	0	0	0	0	0	0	0	0	0	0	0	0	0	0	0	0	0	0	0	0	0	0	0	0	0	0	0	0	0	0	0
266	Chengdu-Taiyuan	10432.8	0	0	0	0	0	0	2931.36	0	0	0	0	0	0	0	0	0	0	3238.07	0	0	0	0	0	0	0	0	0	4263.39	0	0	0	0
267	Hefei-Xiamen	0	0	0	0	0	0	0	0	0	0	0	0	0	0	0	0	0	0	0	0	0	0	0	0	0	0	0	0	0	0	0	0	0
268	Fuzhou-Guiyang	0	0	0	0	0	0	0	0	0	0	0	0	0	0	0	0	0	0	0	0	0	0	0	0	0	0	0	0	0	0	0	0	0
269	Chengdu-Haikou	12480.4	0	0	0	0	0	0	0	0	0	0	0	0	3157.47	0	0	0	0	4797.81	0	0	0	0	3070.3	0	0	0	0	0	0	0	0	1454.86
270	Korla-Urumqi	0	0	0	0	0	0	0	0	0	0	0	0	0	0	0	0	0	0	0	0	0	0	0	0	0	0	0	0	0	0	0	0	0
271	Hohhot-Xi'an	0	0	0	0	0	0	0	0	0	0	0	0	0	0	0	0	0	0	0	0	0	0	0	0	0	0	0	0	0	0	0	0	0
272	Ningbo-Shenzhen	0	0	0	0	0	0	0	0	0	0	0	0	0	0	0	0	0	0	0	0	0	0	0	0	0	0	0	0	0	0	0	0	0
273	Nanjing-Sanya	0	0	0	0	0	0	0	0	0	0	0	0	0	0	0	0	0	0	0	0	0	0	0	0	0	0	0	0	0	0	0	0	0
274	Chongqing-Taiyuan	0	0	0	0	0	0	0	0	0	0	0	0	0	0	0	0	0	0	0	0	0	0	0	0	0	0	0	0	0	0	0	0	0
275	Haikou-Xi'an	0	0	0	0	0	0	0	0	0	0	0	0	0	0	0	0	0	0	0	0	0	0	0	0	0	0	0	0	0	0	0	0	0
276	Zhengzhou-Wenzhou	0	0	0	0	0	0	0	0	0	0	0	0	0	0	0	0	0	0	0	0	0	0	0	0	0	0	0	0	0	0	0	0	0
277	Chongqing-Qingdao	0	0	0	0	0	0	0	0	0	0	0	0	0	0	0	0	0	0	0	0	0	0	0	0	0	0	0	0	0	0	0	0	0
278	Chongqing-Wenzhou	11714.2	0	0	0	0	0	0	0	0	2474.3	0	0	0	0	2906.07	0	666.512	3007.9	0	2659.45	0	0	0	0	0	0	0	0	0	0	0	0	0
279	Guangzhou-Guiyang	0	0	0	0	0	0	0	0	0	0	0	0	0	0	0	0	0	0	0	0	0	0	0	0	0	0	0	0	0	0	0	0	0
280	Jinan-Xiamen	0	0	0	0	0	0	0	0	0	0	0	0	0	0	0	0	0	0	0	0	0	0	0	0	0	0	0	0	0	0	0	0	0
281	Dalian-Qingdao	5787.39	955.303	0	0	0	0	3036.36	0	0	0	0	0	0	0	0	0	0	0	0	0	0	0	0	0	0	0	0	0	0	0	0	1795.73	0
282	Harbin-Shenzhen	0	0	0	0	0	0	0	0	0	0	0	0	0	0	0	0	0	0	0	0	0	0	0	0	0	0	0	0	0	0	0	0	0
283	Kunming-Puer	0	0	0	0	0	0	0	0	0	0	0	0	0	0	0	0	0	0	0	0	0	0	0	0	0	0	0	0	0	0	0	0	0
284	Guangzhou-Shijiangzhuang	0	0	0	0	0	0	0	0	0	0	0	0	0	0	0	0	0	0	0	0	0	0	0	0	0	0	0	0	0	0	0	0	0
285	Zhengzhou-Quanzhou	0	0	0	0	0	0	0	0	0	0	0	0	0	0	0	0	0	0	0	0	0	0	0	0	0	0	0	0	0	0	0	0	0
286	Fuzhou-Nanjing	7833.85	0	0	0	0	0	0	0	1931.69	3437.91	0	0	0	0	0	2464.26	0	0	0	0	0	0	0	0	0	0	0	0	0	0	0	0	0
287	Wenzhou-Xi'an	10498.3	0	0	0	0	2169.25	0	0	0	2366.01	0	2125.96	0	0	949.993	0	0	0	0	0	0	0	0	0	0	0	0	0	2887.1	0	0	0	0
288	Ningbo-Qingdao	0	0	0	0	0	0	0	0	0	0	0	0	0	0	0	0	0	0	0	0	0	0	0	0	0	0	0	0	0	0	0	0	0
289	Guangzhou-Lanzhou	0	0	0	0	0	0	0	0	0	0	0	0	0	0	0	0	0	0	0	0	0	0	0	0	0	0	0	0	0	0	0	0	0
290	Hohhot-Tongliao	9430.04	0	0	0	2493.51	0	0	0	0	0	0	0	0	0	0	0	0	0	0	0	6936.53	0	0	0	0	0	0	0	0	0	0	0	0
291	Changsha-Ningbo	0	0	0	0	0	0	0	0	0	0	0	0	0	0	0	0	0	0	0	0	0	0	0	0	0	0	0	0	0	0	0	0	0
292	Wenzhou-Wuhan	0	0	0	0	0	0	0	0	0	0	0	0	0	0	0	0	0	0	0	0	0	0	0	0	0	0	0	0	0	0	0	0	0
293	Guangzhou-Yiwu	0	0	0	0	0	0	0	0	0	0	0	0	0	0	0	0	0	0	0	0	0	0	0	0	0	0	0	0	0	0	0	0	0
294	Chengdu-Shijiangzhuang	0	0	0	0	0	0	0	0	0	0	0	0	0	0	0	0	0	0	0	0	0	0	0	0	0	0	0	0	0	0	0	0	0
295	Nanchang-Shanghai	0	0	0	0	0	0	0	0	0	0	0	0	0	0	0	0	0	0	0	0	0	0	0	0	0	0	0	0	0	0	0	0	0
296	Tianjin-Wuhan	10369.8	0	0	1285.86	3716.51	3521.44	0	0	0	0	0	0	0	0	0	0	1846	0	0	0	0	0	0	0	0	0	0	0	0	0	0	0	0
297	Sanya-Jinan	0	0	0	0	0	0	0	0	0	0	0	0	0	0	0	0	0	0	0	0	0	0	0	0	0	0	0	0	0	0	0	0	0
298	Chengdu-Xining	9979.04	0	0	0	0	0	0	0	0	0	0	0	0	0	0	0	0	0	4001.46	0	0	0	0	0	0	3763.44	2214.13	0	0	0	0	0	0
299	Qingdao-Xiamen	0	0	0	0	0	0	0	0	0	0	0	0	0	0	0	0	0	0	0	0	0	0	0	0	0	0	0	0	0	0	0	0	0
300	Yinchuan-Shanghai	25669.2	0	0	0	0	5527.49	0	0	3979.25	0	2896.6	4395.87	0	0	0	0	0	0	0	0	0	0	0	0	0	3206.82	0	2907.86	2755.3	0	0	0	0
301	Ordos-Beijing	39309.9	0	9263.58	0	5798.93	0	0	3653.54	0	0	0	0	0	0	0	0	0	0	0	0	20593.8	0	0	0	0	0	0	0	0	0	0	0	0
302	Kunming-Shijiangzhuang	0	0	0	0	0	0	0	0	0	0	0	0	0	0	0	0	0	0	0	0	0	0	0	0	0	0	0	0	0	0	0	0	0
303	Zhengzhou-Ningbo	0	0	0	0	0	0	0	0	0	0	0	0	0	0	0	0	0	0	0	0	0	0	0	0	0	0	0	0	0	0	0	0	0
304	Chongqing-Nanchang	11806.2	0	0	0	0	0	0	0	0	0	0	0	0	0	3290.59	0	433.604	4698.53	0	3383.43	0	0	0	0	0	0	0	0	0	0	0	0	0
305	Chongqing-Ningbo	9864.94	0	0	0	0	0	0	0	0	2418.41	0	409.747	0	0	2214.05	0	584.008	2302.59	0	1936.13	0	0	0	0	0	0	0	0	0	0	0	0	0
306	Changchun-Jinan	0	0	0	0	0	0	0	0	0	0	0	0	0	0	0	0	0	0	0	0	0	0	0	0	0	0	0	0	0	0	0	0	0
307	Chongqing-Shijiangzhuang	0	0	0	0	0	0	0	0	0	0	0	0	0	0	0	0	0	0	0	0	0	0	0	0	0	0	0	0	0	0	0	0	0
308	Zhengzhou-Hohhot	5917.29	0	0	0	0	1493.32	0	2972.44	0	0	0	0	0	0	0	0	0	0	0	0	1451.53	0	0	0	0	0	0	0	0	0	0	0	0
309	Chengdu-Lijiang	12665.6	0	0	0	0	0	0	0	0	0	0	0	0	0	0	0	0	0	9278.6	0	0	0	0	0	3387.01	0	0	0	0	0	0	0	0
310	Changchun-Tianjin	0	0	0	0	0	0	0	0	0	0	0	0	0	0	0	0	0	0	0	0	0	0	0	0	0	0	0	0	0	0	0	0	0
311	Guangzhou-Dalian	0	0	0	0	0	0	0	0	0	0	0	0	0	0	0	0	0	0	0	0	0	0	0	0	0	0	0	0	0	0	0	0	0
312	Zhengzhou-Qingdao	0	0	0	0	0	0	0	0	0	0	0	0	0	0	0	0	0	0	0	0	0	0	0	0	0	0	0	0	0	0	0	0	0
313	Chengdu-Fuzhou	9749.87	0	0	0	0	0	0	0	0	0	0	0	0	0	1756.77	2433.35	0	2316.1	1421.7	1821.95	0	0	0	0	0	0	0	0	0	0	0	0	0
314	Harbin-Xi'an	0	0	0	0	0	0	0	0	0	0	0	0	0	0	0	0	0	0	0	0	0	0	0	0	0	0	0	0	0	0	0	0	0
315	Guiyang-Sanya	0	0	0	0	0	0	0	0	0	0	0	0	0	0	0	0	0	0	0	0	0	0	0	0	0	0	0	0	0	0	0	0	0
316	Guilin-Beijing	41998.9	0	5115.1	0	6592.99	5469.2	0	2801	0	0	0	0	0	4074.94	0	0	4461.23	8401.17	0	913.522	0	0	0	0	0	0	0	0	4169.76	0	0	0	0
317	Fuzhou-Changsha	0	0	0	0	0	0	0	0	0	0	0	0	0	0	0	0	0	0	0	0	0	0	0	0	0	0	0	0	0	0	0	0	0
318	Nanjing-Qingdao	0	0	0	0	0	0	0	0	0	0	0	0	0	0	0	0	0	0	0	0	0	0	0	0	0	0	0	0	0	0	0	0	0
319	Fuzhou-Tianjin	9836.75	0	0	969.219	1307.67	0	1585.2	0	955.93	0	0	1945.83	0	0	1011.33	2061.56	0	0	0	0	0	0	0	0	0	0	0	0	0	0	0	0	0
320	Shenzhen-Taiyuan	0	0	0	0	0	0	0	0	0	0	0	0	0	0	0	0	0	0	0	0	0	0	0	0	0	0	0	0	0	0	0	0	0
321	Nanchang-Zhuhai	0	0	0	0	0	0	0	0	0	0	0	0	0	0	0	0	0	0	0	0	0	0	0	0	0	0	0	0	0	0	0	0	0
322	Dalian-Shenzhen	9953.59	428.229	0	0	0	0	1256.04	0	1202.69	0	0	2325.43	1253.84	0	2739.09	0	0	0	0	0	0	0	0	0	0	0	0	0	0	0	0	748.267	0
323	Changsha-Taiyuan	0	0	0	0	0	0	0	0	0	0	0	0	0	0	0	0	0	0	0	0	0	0	0	0	0	0	0	0	0	0	0	0	0
324	Quanzhou-Kunming	0	0	0	0	0	0	0	0	0	0	0	0	0	0	0	0	0	0	0	0	0	0	0	0	0	0	0	0	0	0	0	0	0
325	Hefei-Beijing	31937.4	0	4850.14	0	6372.34	0	8392.18	0	1539.82	0	0	10782.9	0	0	0	0	0	0	0	0	0	0	0	0	0	0	0	0	0	0	0	0	0
326	Shijiangzhuang-Shenzhen	0	0	0	0	0	0	0	0	0	0	0	0	0	0	0	0	0	0	0	0	0	0	0	0	0	0	0	0	0	0	0	0	0
327	Changchun-Hangzhou	15784.8	6468.2	0	0	0	0	2272.67	0	0	1953.47	0	0	0	0	0	0	0	0	0	0	0	0	0	0	0	0	0	0	0	0	2119.58	2970.87	0
328	Enshi-Wuhan	0	0	0	0	0	0	0	0	0	0	0	0	0	0	0	0	0	0	0	0	0	0	0	0	0	0	0	0	0	0	0	0	0
329	Beijing-Taiyuan	6642.55	0	2651.07	0	2003.5	0	0	1987.98	0	0	0	0	0	0	0	0	0	0	0	0	0	0	0	0	0	0	0	0	0	0	0	0	0
330	Chongqing-Quanzhou	0	0	0	0	0	0	0	0	0	0	0	0	0	0	0	0	0	0	0	0	0	0	0	0	0	0	0	0	0	0	0	0	0
331	Chengdu-Yinchuan	21859.2	0	0	0	0	0	0	0	0	0	0	0	0	0	0	0	0	0	7722.5	0	1835.21	0	0	0	0	7244.55	0	5056.93	0	0	0	0	0
332	Chengdu-Nanchang	13847.2	0	0	0	0	0	0	0	0	0	0	0	0	0	4186.86	0	451.061	3531.57	4016.88	1660.85	0	0	0	0	0	0	0	0	0	0	0	0	0
333	Zhengzhou-Yinchuan	0	0	0	0	0	0	0	0	0	0	0	0	0	0	0	0	0	0	0	0	0	0	0	0	0	0	0	0	0	0	0	0	0
334	Nanning-Xiamen	0	0	0	0	0	0	0	0	0	0	0	0	0	0	0	0	0	0	0	0	0	0	0	0	0	0	0	0	0	0	0	0	0
335	Fuzhou-Kunming	0	0	0	0	0	0	0	0	0	0	0	0	0	0	0	0	0	0	0	0	0	0	0	0	0	0	0	0	0	0	0	0	0
336	Hefei-Xi'an	0	0	0	0	0	0	0	0	0	0	0	0	0	0	0	0	0	0	0	0	0	0	0	0	0	0	0	0	0	0	0	0	0
337	Guangzhou-Hohhot	10443.3	0	0	0	0	1403.45	0	2151.29	0	0	0	0	1786.8	0	0	0	1435.07	2072.68	0	0	1594.02	0	0	0	0	0	0	0	0	0	0	0	0
338	Nanning-Jinan	0	0	0	0	0	0	0	0	0	0	0	0	0	0	0	0	0	0	0	0	0	0	0	0	0	0	0	0	0	0	0	0	0
339	Wuhan-Zhuhai	10575.2	0	0	0	0	0	0	0	0	0	0	0	3921.39	0	0	0	2554.31	4099.52	0	0	0	0	0	0	0	0	0	0	0	0	0	0	0
340	Nanchang-Qingdao	0	0	0	0	0	0	0	0	0	0	0	0	0	0	0	0	0	0	0	0	0	0	0	0	0	0	0	0	0	0	0	0	0
341	Shijiangzhuang-Xiamen	0	0	0	0	0	0	0	0	0	0	0	0	0	0	0	0	0	0	0	0	0	0	0	0	0	0	0	0	0	0	0	0	0
342	Guangzhou-Nanchang	0	0	0	0	0	0	0	0	0	0	0	0	0	0	0	0	0	0	0	0	0	0	0	0	0	0	0	0	0	0	0	0	0
343	Guilin-Nanjing	0	0	0	0	0	0	0	0	0	0	0	0	0	0	0	0	0	0	0	0	0	0	0	0	0	0	0	0	0	0	0	0	0
344	Zhengzhou-Xining	0	0	0	0	0	0	0	0	0	0	0	0	0	0	0	0	0	0	0	0	0	0	0	0	0	0	0	0	0	0	0	0	0
345	Wuhan-Xi'an	0	0	0	0	0	0	0	0	0	0	0	0	0	0	0	0	0	0	0	0	0	0	0	0	0	0	0	0	0	0	0	0	0
346	Nanjing-Lanzhou	0	0	0	0	0	0	0	0	0	0	0	0	0	0	0	0	0	0	0	0	0	0	0	0	0	0	0	0	0	0	0	0	0
347	Changsha-Urumqi	0	0	0	0	0	0	0	0	0	0	0	0	0	0	0	0	0	0	0	0	0	0	0	0	0	0	0	0	0	0	0	0	0
348	Hefei-Zhuhai	0	0	0	0	0	0	0	0	0	0	0	0	0	0	0	0	0	0	0	0	0	0	0	0	0	0	0	0	0	0	0	0	0
349	Kunming-Wuxi	0	0	0	0	0	0	0	0	0	0	0	0	0	0	0	0	0	0	0	0	0	0	0	0	0	0	0	0	0	0	0	0	0
350	Changsha-Lanzhou	0	0	0	0	0	0	0	0	0	0	0	0	0	0	0	0	0	0	0	0	0	0	0	0	0	0	0	0	0	0	0	0	0
351	Guangzhou-Lijiang	0	0	0	0	0	0	0	0	0	0	0	0	0	0	0	0	0	0	0	0	0	0	0	0	0	0	0	0	0	0	0	0	0
352	Hohhot-Changsha	0	0	0	0	0	0	0	0	0	0	0	0	0	0	0	0	0	0	0	0	0	0	0	0	0	0	0	0	0	0	0	0	0
353	Guilin-Xiamen	0	0	0	0	0	0	0	0	0	0	0	0	0	0	0	0	0	0	0	0	0	0	0	0	0	0	0	0	0	0	0	0	0
354	Haikou-Guilin	0	0	0	0	0	0	0	0	0	0	0	0	0	0	0	0	0	0	0	0	0	0	0	0	0	0	0	0	0	0	0	0	0
355	Xi'an-Yantai	0	0	0	0	0	0	0	0	0	0	0	0	0	0	0	0	0	0	0	0	0	0	0	0	0	0	0	0	0	0	0	0	0
356	Guiyang-Tianjin	13703.1	0	0	1597.96	1928.16	663.91	0	2012.92	0	0	0	0	0	0	0	0	2034.69	1074.73	0	806.344	0	0	0	3042.91	0	0	0	0	541.487	0	0	0	0
357	Xingyi-Guiyang	0	0	0	0	0	0	0	0	0	0	0	0	0	0	0	0	0	0	0	0	0	0	0	0	0	0	0	0	0	0	0	0	0
358	Kunming-Lanzhou	0	0	0	0	0	0	0	0	0	0	0	0	0	0	0	0	0	0	0	0	0	0	0	0	0	0	0	0	0	0	0	0	0
359	Haikou-Xiamen	0	0	0	0	0	0	0	0	0	0	0	0	0	0	0	0	0	0	0	0	0	0	0	0	0	0	0	0	0	0	0	0	0
360	Zhangjiajie-Shanghai	0	0	0	0	0	0	0	0	0	0	0	0	0	0	0	0	0	0	0	0	0	0	0	0	0	0	0	0	0	0	0	0	0
361	Hangzhou-Jieyang	0	0	0	0	0	0	0	0	0	0	0	0	0	0	0	0	0	0	0	0	0	0	0	0	0	0	0	0	0	0	0	0	0
362	Dalian-Wuhan	0	0	0	0	0	0	0	0	0	0	0	0	0	0	0	0	0	0	0	0	0	0	0	0	0	0	0	0	0	0	0	0	0
363	Hangzhou-Changsha	0	0	0	0	0	0	0	0	0	0	0	0	0	0	0	0	0	0	0	0	0	0	0	0	0	0	0	0	0	0	0	0	0
364	Chengdu-Zhuhai	8143.98	0	0	0	0	0	0	0	0	0	0	0	1803.95	1787.65	0	0	0	0	2833.23	0	0	0	0	1719.15	0	0	0	0	0	0	0	0	0
365	Dali-Kunming	0	0	0	0	0	0	0	0	0	0	0	0	0	0	0	0	0	0	0	0	0	0	0	0	0	0	0	0	0	0	0	0	0
366	Changsha-Jieyang	0	0	0	0	0	0	0	0	0	0	0	0	0	0	0	0	0	0	0	0	0	0	0	0	0	0	0	0	0	0	0	0	0
367	Changchun-Shijiangzhuang	0	0	0	0	0	0	0	0	0	0	0	0	0	0	0	0	0	0	0	0	0	0	0	0	0	0	0	0	0	0	0	0	0
368	Kunming-Sanya	0	0	0	0	0	0	0	0	0	0	0	0	0	0	0	0	0	0	0	0	0	0	0	0	0	0	0	0	0	0	0	0	0
369	Fuzhou-Nanning	0	0	0	0	0	0	0	0	0	0	0	0	0	0	0	0	0	0	0	0	0	0	0	0	0	0	0	0	0	0	0	0	0
370	Nanchang-Taiyuan	0	0	0	0	0	0	0	0	0	0	0	0	0	0	0	0	0	0	0	0	0	0	0	0	0	0	0	0	0	0	0	0	0
371	Wuhan-Lanzhou	0	0	0	0	0	0	0	0	0	0	0	0	0	0	0	0	0	0	0	0	0	0	0	0	0	0	0	0	0	0	0	0	0
372	Beijing-Weihai	18746.4	3012.2	3889.76	1350.3	3362.76	0	7131.34	0	0	0	0	0	0	0	0	0	0	0	0	0	0	0	0	0	0	0	0	0	0	0	0	0	0
373	Chongqing-Yinchuan	7476.59	0	0	0	0	0	0	0	0	0	0	0	0	0	0	0	0	0	1622.48	1236.32	0	0	0	0	0	1000.37	0	1517.68	2099.74	0	0	0	0
374	Ningbo-Xi'an	0	0	0	0	0	0	0	0	0	0	0	0	0	0	0	0	0	0	0	0	0	0	0	0	0	0	0	0	0	0	0	0	0
375	Guiyang-Jinan	0	0	0	0	0	0	0	0	0	0	0	0	0	0	0	0	0	0	0	0	0	0	0	0	0	0	0	0	0	0	0	0	0
376	Hailar-Beijing	20382.7	0	3340.83	0	3400.19	0	0	0	0	0	0	0	0	0	0	0	0	0	0	0	13641.7	0	0	0	0	0	0	0	0	0	0	0	0
377	Hohhot-Xilinhot	7273.53	0	0	0	0	0	0	0	0	0	0	0	0	0	0	0	0	0	0	0	7273.53	0	0	0	0	0	0	0	0	0	0	0	0
378	Lijiang-Xi'an	0	0	0	0	0	0	0	0	0	0	0	0	0	0	0	0	0	0	0	0	0	0	0	0	0	0	0	0	0	0	0	0	0
379	Shijiangzhuang-Sanya	0	0	0	0	0	0	0	0	0	0	0	0	0	0	0	0	0	0	0	0	0	0	0	0	0	0	0	0	0	0	0	0	0
380	Zhengzhou-Lanzhou	0	0	0	0	0	0	0	0	0	0	0	0	0	0	0	0	0	0	0	0	0	0	0	0	0	0	0	0	0	0	0	0	0
381	Guangzhou-Yichang	0	0	0	0	0	0	0	0	0	0	0	0	0	0	0	0	0	0	0	0	0	0	0	0	0	0	0	0	0	0	0	0	0
382	Nanjing-Zhuhai	0	0	0	0	0	0	0	0	0	0	0	0	0	0	0	0	0	0	0	0	0	0	0	0	0	0	0	0	0	0	0	0	0
383	Hangzhou-Yantai	5901.71	2938.41	0	0	0	0	1761.68	0	0	1201.63	0	0	0	0	0	0	0	0	0	0	0	0	0	0	0	0	0	0	0	0	0	0	0
384	Chongqing-Wuxi	0	0	0	0	0	0	0	0	0	0	0	0	0	0	0	0	0	0	0	0	0	0	0	0	0	0	0	0	0	0	0	0	0
385	Shenyang-Xiamen	0	0	0	0	0	0	0	0	0	0	0	0	0	0	0	0	0	0	0	0	0	0	0	0	0	0	0	0	0	0	0	0	0
386	Quanzhou-Wuhan	0	0	0	0	0	0	0	0	0	0	0	0	0	0	0	0	0	0	0	0	0	0	0	0	0	0	0	0	0	0	0	0	0
387	Dalian-Hefei	8427.22	765.314	0	0	0	0	2244.75	0	2149.41	0	0	1930.47	0	0	0	0	0	0	0	0	0	0	0	0	0	0	0	0	0	0	0	1337.28	0
388	Nanchang-Guiyang	0	0	0	0	0	0	0	0	0	0	0	0	0	0	0	0	0	0	0	0	0	0	0	0	0	0	0	0	0	0	0	0	0
389	Jiamusi-Beijing	26834	0	3777.82	0	2681.84	0	0	0	0	0	0	0	0	0	0	0	0	0	0	0	6527.52	0	0	0	0	0	0	0	0	7826.33	4703.68	1316.77	0
390	Shanghai-Zunyi	0	0	0	0	0	0	0	0	0	0	0	0	0	0	0	0	0	0	0	0	0	0	0	0	0	0	0	0	0	0	0	0	0
391	Guiyang-Wuhan	7136.63	0	0	0	0	0	0	0	0	0	0	0	0	0	0	0	2431.56	2037.34	0	0	0	0	0	2667.72	0	0	0	0	0	0	0	0	0
392	Zhoushan-Quanzhou	0	0	0	0	0	0	0	0	0	0	0	0	0	0	0	0	0	0	0	0	0	0	0	0	0	0	0	0	0	0	0	0	0
393	Haikou-Taiyuan	0	0	0	0	0	0	0	0	0	0	0	0	0	0	0	0	0	0	0	0	0	0	0	0	0	0	0	0	0	0	0	0	0
394	Beihai-Shanghai	0	0	0	0	0	0	0	0	0	0	0	0	0	0	0	0	0	0	0	0	0	0	0	0	0	0	0	0	0	0	0	0	0
395	Mianyang-Shanghai	0	0	0	0	0	0	0	0	0	0	0	0	0	0	0	0	0	0	0	0	0	0	0	0	0	0	0	0	0	0	0	0	0
396	Nanchang-Tianjin	0	0	0	0	0	0	0	0	0	0	0	0	0	0	0	0	0	0	0	0	0	0	0	0	0	0	0	0	0	0	0	0	0
397	Haikou-Zhuhai	0	0	0	0	0	0	0	0	0	0	0	0	0	0	0	0	0	0	0	0	0	0	0	0	0	0	0	0	0	0	0	0	0
398	Fuzhou-Qingdao	0	0	0	0	0	0	0	0	0	0	0	0	0	0	0	0	0	0	0	0	0	0	0	0	0	0	0	0	0	0	0	0	0
399	Shanghai Pudong-Jinan	0	0	0	0	0	0	0	0	0	0	0	0	0	0	0	0	0	0	0	0	0	0	0	0	0	0	0	0	0	0	0	0	0
400	Shanghai Hongqiao-Jinan	0	0	0	0	0	0	0	0	0	0	0	0	0	0	0	0	0	0	0	0	0	0	0	0	0	0	0	0	0	0	0	0	0
401	Wuxi-Xiamen	0	0	0	0	0	0	0	0	0	0	0	0	0	0	0	0	0	0	0	0	0	0	0	0	0	0	0	0	0	0	0	0	0
402	Daqing-Beijing	22776.6	0	4166.69	0	2041.97	0	0	0	0	0	0	0	0	0	0	0	0	0	0	0	7741.22	0	0	0	0	0	0	0	0	5416.77	3409.92	0	0
403	Jinan-Urumqi	0	0	0	0	0	0	0	0	0	0	0	0	0	0	0	0	0	0	0	0	0	0	0	0	0	0	0	0	0	0	0	0	0
404	Shenyang-Taiyuan	0	0	0	0	0	0	0	0	0	0	0	0	0	0	0	0	0	0	0	0	0	0	0	0	0	0	0	0	0	0	0	0	0
405	Hohhot-Tianjin	6030.07	0	632.313	1796.5	1320.08	0	0	0	0	0	0	0	0	0	0	0	0	0	0	0	2281.18	0	0	0	0	0	0	0	0	0	0	0	0
406	Shenyang-Wuxi	0	0	0	0	0	0	0	0	0	0	0	0	0	0	0	0	0	0	0	0	0	0	0	0	0	0	0	0	0	0	0	0	0
407	Nanchang-Jinan	0	0	0	0	0	0	0	0	0	0	0	0	0	0	0	0	0	0	0	0	0	0	0	0	0	0	0	0	0	0	0	0	0
408	Diqing-Kunming	0	0	0	0	0	0	0	0	0	0	0	0	0	0	0	0	0	0	0	0	0	0	0	0	0	0	0	0	0	0	0	0	0
409	Haikou-Ningbo	0	0	0	0	0	0	0	0	0	0	0	0	0	0	0	0	0	0	0	0	0	0	0	0	0	0	0	0	0	0	0	0	0
410	Tianjin-Urumqi	15305.3	0	581.091	1207.22	1125.46	0	0	723.807	0	0	0	0	0	0	0	0	0	0	0	0	6388.74	4247.02	0	0	0	1032.02	0	0	0	0	0	0	0
411	Shanghai-Zhanjiang	0	0	0	0	0	0	0	0	0	0	0	0	0	0	0	0	0	0	0	0	0	0	0	0	0	0	0	0	0	0	0	0	0
412	Dalian-Shijiangzhuang	7252.53	1924.76	0	1002.78	2803.84	0	0	0	0	0	0	0	0	0	0	0	0	0	0	0	0	0	0	0	0	0	0	0	0	0	0	1521.15	0
413	Harbin-Shijiangzhuang	0	0	0	0	0	0	0	0	0	0	0	0	0	0	0	0	0	0	0	0	0	0	0	0	0	0	0	0	0	0	0	0	0
